# Supplementary material for: Identification and Analysis of Multi-Protein Complexes in Placenta
Source: PLoS One. 2013 Apr 29;8(4):e62988. doi: 10.1371/journal.pone.0062988 (PMC3639281; doi:10.1371/journal.pone.0062988)
Supplement: Table S2 — Placenta proteins identified by BN/SDS-PAGE. (XLS) [file pone.0062988.s003.xls]

## Sheet: protein_idenditification
gel bands or spots	prot_hit_num	prot_acc	protein source	uniprot accession	uniport entry name	prot_desc	prot_score	prot_mass	prot_matches	prot_matches_sig	prot_sequences	prot_sequences_sig	prot_cover	pep_query	pep_rank	pep_isbold	pep_isunique	pep_exp_mz	pep_exp_mr	pep_exp_z	pep_calc_mr	pep_delta	pep_miss	pep_score	pep_expect	pep_res_before	pep_seq	pep_res_after	pep_var_mod
1D-3,2D-45,2D-47	128	sp|P61604|CH10_HUMAN	sp	P61604	CH10_HUMAN	10 kDa heat shock protein, mitochondrial OS=Homo sapiens GN=HSPE1 PE=1 SV=2	59	10925	3	3	1	1	13.7	1959	1	1	1	658.383	1314.75	2	1314.75	0.0011	0	54.41	0.00014	K	VLQATVVAVGSGSK	G
1D-1,1D-8,2D-66,2D-87	128	sp|O60613|SEP15_HUMAN	sp	O60613	SEP15_HUMAN	15 kDa selenoprotein OS=Homo sapiens GN=SEP15 PE=1 SV=3	78	18236	2	2	1	1	9.9	3438	1	1	1	878.973	1755.93	2	1755.93	0.0054	0	78.34	6.1e-07	K	LLDDNGNIAEELSILK	W
1D-7,2D-23,2D-27,2D-63,2D-69	214	sp|Q9NQ66|PLCB1_HUMAN	sp	Q9NQ66	PLCB1_HUMAN	1-phosphatidylinositol-4,5-bisphosphate phosphodiesterase beta-1 OS=Homo sapiens GN=PLCB1 PE=1 SV=1	29	139335	1	0	1	0	0.6	142	1	1	1	422.753	843.491	2	843.506	-0.0159	1	28.97	0.073	K	LIDLKDK	Q
1D-1,1D-4,2D-5,2D-18,2D-29,2D-45,2D-58,2D-64	227	sp|P16885|PLCG2_HUMAN	sp	P16885	PLCG2_HUMAN	1-phosphatidylinositol-4,5-bisphosphate phosphodiesterase gamma-2 OS=Homo sapiens GN=PLCG2 PE=1 SV=4	29	148974	1	1	1	1	1.1	2972	2	0	1	535.994	1604.96	3	1604.91	0.0455	2	28.97	0.012	R	TTKIKFDDVVQAIK	D
1D-2,2D-15,2D-17	94	sp|O00487|PSDE_HUMAN	sp	O00487	PSDE_HUMAN	26S proteasome non-ATPase regulatory subunit 14 OS=Homo sapiens GN=PSMD14 PE=1 SV=1	35	34726	1	1	1	1	4.2	1882	1	1	1	662.899	1323.78	2	1323.78	0.0082	0	34.75	0.0051	R	AVAVVVDPIQSVK	G
1D-6,2D-68,2D-69	91	sp|Q02218|ODO1_HUMAN	sp	Q02218	ODO1_HUMAN	2-oxoglutarate dehydrogenase, mitochondrial OS=Homo sapiens GN=OGDH PE=1 SV=3	34	117059	2	1	1	1	1	888	1	1	1	553.288	1104.56	2	1104.56	0.0025	0	33.74	0.023	R	DMVGQVAITR	I	Oxidation (M)
1D-6,2D-67,2D-68	145	sp|Q9ULD0|OGDHL_HUMAN	sp	Q9ULD0	OGDHL_HUMAN	2-oxoglutarate dehydrogenase-like, mitochondrial OS=Homo sapiens GN=OGDHL PE=1 SV=3	30	115264	1	1	1	1	1	1046	2	0	1	546.771	1091.53	2	1091.52	0.0029	0	30.3	0.039	R	SSPYPTDVAR	V
1D-3,2D-45,2D-47	19	sp|P14060|3BHS1_HUMAN	sp	P14060	3BHS1_HUMAN	3 beta-hydroxysteroid dehydrogenase/Delta 5-->4-isomerase type 1 OS=Homo sapiens GN=HSD3B1 PE=1 SV=2	491	42510	21	21	9	9	33.2	1224	1	1	1	630.838	1259.66	2	1259.65	0.0114	0	32.92	0.029	K	TVEWVGSLVDR	H
1D-4,2D-55,2D-56,2D-57	178	sp|Q9P035|HACD3_HUMAN	sp	Q9P035	HACD3_HUMAN	3-hydroxyacyl-CoA dehydratase 3 OS=Homo sapiens GN=PTPLAD1 PE=1 SV=2	29	43360	1	1	1	1	2.8	1446	1	1	1	599.83	1197.65	2	1197.64	0.0022	0	29.1	0.05	R	FSFTLPYPVK	I
1D-4,2D-55,2D-56,2D-57	102	sp|Q99714|HCD2_HUMAN	sp	Q99714	HCD2_HUMAN	3-hydroxyacyl-CoA dehydrogenase type-2 OS=Homo sapiens GN=HSD17B10 PE=1 SV=3	84	27134	2	2	1	1	7.7	3718	1	1	1	907.015	1812.02	2	1812.01	0.0055	0	66.05	6.8e-06	K	GLVAVITGGASGLGLATAER	L
1D-4,2D-54,2D-57	21	sp|P31937|3HIDH_HUMAN	sp	P31937	3HIDH_HUMAN	3-hydroxyisobutyrate dehydrogenase, mitochondrial OS=Homo sapiens GN=HIBADH PE=1 SV=2	521	35705	20	20	8	8	33.3	2954	1	1	1	784.454	1566.89	2	1566.89	0.0045	0	54.73	9e-05	K	SPILLGSLAHQIYR	M
1D-4,2D-53,2D-56	49	sp|P42765|THIM_HUMAN	sp	P42765	THIM_HUMAN	3-ketoacyl-CoA thiolase, mitochondrial OS=Homo sapiens GN=ACAA2 PE=1 SV=2	239	42354	9	9	5	5	17.9	4396	1	1	1	882.122	2643.35	3	2643.34	0.0099	1	45.85	0.00091	K	DGTVTAGNASGVADGAGAVIIASEDAVKK	H
1D-5,2D-61	212	sp|P62263|RS14_HUMAN	sp	P62263	RS14_HUMAN	40S ribosomal protein S14 OS=Homo sapiens GN=RPS14 PE=1 SV=3	29	16434	1	0	1	0	5.3	146	1	1	1	422.756	843.498	2	843.467	0.0308	1	29.11	0.069	K	LRATGGNR	T
1D-5,2D-65,2D-67	214	sp|P62753|RS6_HUMAN	sp	P62753	RS6_HUMAN	40S ribosomal protein S6 OS=Homo sapiens GN=RPS6 PE=1 SV=1	31	28834	1	1	1	1	2.8	99	3	0	1	425.248	848.482	2	848.512	-0.0295	1	30.69	0.032	R	KLFNLSK	E
1D-5	128	sp|P80404|GABT_HUMAN	sp	P80404	GABT_HUMAN	4-aminobutyrate aminotransferase, mitochondrial OS=Homo sapiens GN=ABAT PE=1 SV=3	76	57087	2	2	1	1	2.4	1878	1	1	1	642.39	1282.76	2	1282.76	0.004	0	51.91	0.00013	K	ALLTGLLDLQAR	Y
1D-9,2D-97	65	sp|P08195|4F2_HUMAN	sp	P08195	4F2_HUMAN	4F2 cell-surface antigen heavy chain OS=Homo sapiens GN=SLC3A2 PE=1 SV=3	70	68180	2	2	2	2	4	1398	1	1	1	623.303	1244.59	2	1244.59	0.0032	0	36.45	0.0083	K	VAEDEAEAAAAAK	F
1D-8,2D-71,2D-73	194	sp|Q86UY8|NT5D3_HUMAN	sp	Q86UY8	NT5D3_HUMAN	5~-nucleotidase domain-containing protein 3 OS=Homo sapiens GN=NT5DC3 PE=2 SV=1	32	63721	1	1	1	1	1.6	470	1	1	1	485.292	968.569	2	968.566	0.0032	0	31.91	0.016	R	TGAIIPELR	S
1D-8,2D-81,2D-82	87	sp|P21589|5NTD_HUMAN	sp	P21589	5NTD_HUMAN	5~-nucleotidase OS=Homo sapiens GN=NT5E PE=1 SV=1	113	63898	5	5	2	2	5.6	3455	1	1	1	866.483	1730.95	2	1730.95	0.0058	0	64.79	1.1e-05	K	VLPVGDEVVGIVGYTSK	E
1D-3,2D-5	185	sp|Q00013|EM55_HUMAN	sp	Q00013	EM55_HUMAN	55 kDa erythrocyte membrane protein OS=Homo sapiens GN=MPP1 PE=1 SV=2	43	52492	1	1	1	1	2.6	2072	1	1	1	677.406	1352.8	2	1352.79	0.0052	0	42.86	0.00096	K	IAILDIEPQTLK	I
1D-5,2D-56,2D-57	114	sp|Q9H6S1|AZI2_HUMAN	sp	Q9H6S1	AZI2_HUMAN	5-azacytidine-induced protein 2 OS=Homo sapiens GN=AZI2 PE=1 SV=1	40	45420	1	1	1	1	2	604	2	0	1	500.303	998.592	2	998.576	0.0162	0	39.62	0.0038	K	EVELLQLR	T
1D-3,2D-35,2D-37	37	sp|P10809|CH60_HUMAN	sp	P10809	CH60_HUMAN	60 kDa heat shock protein, mitochondrial OS=Homo sapiens GN=HSPD1 PE=1 SV=2	149	61187	6	6	3	3	8.9	408	1	1	1	480.76	959.505	2	959.504	0.0012	0	39.43	0.0073	R	VTDALNATR	A
1D-2,2D-22,2D-23	203	sp|Q8NHW5|RLA0L_HUMAN	sp	Q8NHW5	RLA0L_HUMAN	60S acidic ribosomal protein P0-like OS=Homo sapiens GN=RPLP0P6 PE=5 SV=1	31	34514	1	1	1	1	3.8	1879	1	1	1	657.362	1312.71	2	1312.7	0.0067	0	30.79	0.034	K	TSFFQALGITTK	I
1D-2	7	sp|P11021|GRP78_HUMAN	sp	P11021	GRP78_HUMAN	78 kDa glucose-regulated protein OS=Homo sapiens GN=HSPA5 PE=1 SV=2	495	72402	16	16	11	11	21.3	1516	1	1	1	617.318	1232.62	2	1232.62	0.0029	0	33.81	0.021	K	DAGTIAGLNVMR	I	Oxidation (M)
1D-4,2D-44,2D-47	161	sp|A1L0T0|ILVBL_HUMAN	sp	A1L0T0	ILVBL_HUMAN	Acetolactate synthase-like protein OS=Homo sapiens GN=ILVBL PE=1 SV=2	47	68452	1	1	1	1	3.6	4531	1	1	1	795.101	2382.28	3	2382.27	0.0123	0	46.55	0.00069	K	NAQMAQSPILLLGGAASTLLQNR	G	Oxidation (M)
1D-2,2D-23,2D-29	134	sp|P24752|THIL_HUMAN	sp	P24752	THIL_HUMAN	Acetyl-CoA acetyltransferase, mitochondrial OS=Homo sapiens GN=ACAT1 PE=1 SV=1	75	45456	1	1	1	1	4	3241	1	1	1	851.499	1700.98	2	1700.97	0.0116	0	74.9	6.8e-07	R	TPIGSFLGSLSLLPATK	L
1D-2,2D-25	117	sp|Q9NUB1|ACS2L_HUMAN	sp	Q9NUB1	ACS2L_HUMAN	Acetyl-coenzyme A synthetase 2-like, mitochondrial OS=Homo sapiens GN=ACSS1 PE=1 SV=2	69	75664	1	1	1	1	2	2529	1	1	1	731.359	1460.7	2	1460.7	0.0036	0	68.7	5.8e-06	K	DSAGDSDVVVQELK	S
1D-4,1D-8,2D-44,2D-47,2D-82,2D-88	30	sp|Q99798|ACON_HUMAN	sp	Q99798	ACON_HUMAN	Aconitate hydratase, mitochondrial OS=Homo sapiens GN=ACO2 PE=1 SV=2	388	86113	18	17	8	8	13.8	383	1	1	1	468.252	934.49	2	934.487	0.003	0	33.3	0.026	R	DGYAQILR	D
1D-3,1D-5,1D-8,2D-35,2D-56	8	sp|P62736|ACTA_HUMAN	sp	P62736	ACTA_HUMAN	Actin, aortic smooth muscle OS=Homo sapiens GN=ACTA2 PE=1 SV=1	431	42381	24	23	9	9	23.6	330	1	0	0	462.288	922.562	2	922.56	0.0017	1	29.6	0.016	K	IIAPPERK	Y
1D-3,1D-5,1D-8,2D-35,2D-54,2D-83,	1	sp|P60709|ACTB_HUMAN	sp	P60709	ACTB_HUMAN	Actin, cytoplasmic 1 OS=Homo sapiens GN=ACTB PE=1 SV=1	867	42052	59	58	16	16	54.4	330	1	1	0	462.288	922.562	2	922.56	0.0017	1	29.6	0.016	K	IIAPPERK	Y
1D-3,1D-5,1D-8,2D-32,2D-54,2D-56,2D-58	9	sp|P63261|ACTG_HUMAN	sp	P63261	ACTG_HUMAN	Actin, cytoplasmic 2 OS=Homo sapiens GN=ACTG1 PE=1 SV=1	910	42108	62	62	14	14	50.1	2155	1	0	0	677.818	1353.62	2	1353.62	0.0046	1	52.69	0.00016	K	DSYVGDEAQSKR	G
1D-3,1D-5,1D-8,2D-37,2D-86	143	sp|P61160|ARP2_HUMAN	sp	P61160	ARP2_HUMAN	Actin-related protein 2 OS=Homo sapiens GN=ACTR2 PE=1 SV=1	39	45017	2	2	1	1	3	2163	1	1	1	685.376	1368.74	2	1368.73	0.0054	0	39.08	0.0049	K	ILLTEPPMNPTK	N	Oxidation (M)
1D-3,1D-5,1D-8,2D-34,2D-53,2D-88	146	sp|P59998|ARPC4_HUMAN	sp	P59998	ARPC4_HUMAN	Actin-related protein 2/3 complex subunit 4 OS=Homo sapiens GN=ARPC4 PE=1 SV=3	52	19768	1	1	1	1	6.5	1251	1	1	1	634.887	1267.76	2	1267.75	0.0097	0	51.5	0.00012	K	ELLLQPVTISR	N
1D-3,1D-5,1D-8,2D-32,2D-57,2D-86	154	sp|Q9C0K3|ARP3C_HUMAN	sp	Q9C0K3	ARP3C_HUMAN	Actin-related protein 3C OS=Homo sapiens GN=ACTR3C PE=2 SV=1	47	23925	2	2	1	1	5.2	1692	1	1	1	705.396	1408.78	2	1408.77	0.0056	0	46.16	0.00073	R	DITYFIQQLLR	E
1D-8	200	sp|Q9H2P0|ADNP_HUMAN	sp	Q9H2P0	ADNP_HUMAN	Activity-dependent neuroprotector homeobox protein OS=Homo sapiens GN=ADNP PE=1 SV=1	29	124854	1	1	1	1	0.8	645	2	0	1	507.286	1012.56	2	1012.57	-0.0091	1	29.23	0.041	K	NKNDGLKPK	Q
1D-8,2D-85,2D-87	83	sp|P13798|ACPH_HUMAN	sp	P13798	ACPH_HUMAN	Acylamino-acid-releasing enzyme OS=Homo sapiens GN=APEH PE=1 SV=4	120	82142	6	6	3	3	5.1	2298	1	1	1	701.377	1400.74	2	1400.73	0.0061	0	40.37	0.0046	K	TPLLLMLGQEDR	R	Oxidation (M)
1D-8,2D-85	214	sp|Q9H845|ACAD9_HUMAN	sp	Q9H845	ACAD9_HUMAN	Acyl-CoA dehydrogenase family member 9, mitochondrial OS=Homo sapiens GN=ACAD9 PE=1 SV=1	28	69344	1	0	1	0	2.4	2877	1	1	1	793.925	1585.84	2	1585.84	0.0011	0	28.48	0.067	K	IPVENILGEVGDGFK	V
1D-8	218	sp|O75608|LYPA1_HUMAN	sp	O75608	LYPA1_HUMAN	Acyl-protein thioesterase 1 OS=Homo sapiens GN=LYPLA1 PE=1 SV=1	30	24996	2	1	1	1	5.7	1819	1	1	1	636.33	1270.65	2	1270.64	0.0036	0	30.05	0.043	R	ASFPQGPIGGANR	D
1D-1	29	sp|P23526|SAHH_HUMAN	sp	P23526	SAHH_HUMAN	Adenosylhomocysteinase OS=Homo sapiens GN=AHCY PE=1 SV=4	421	48255	18	16	8	8	18.8	2140	1	1	1	690.88	1379.75	2	1379.74	0.0048	1	66.74	8.9e-06	K	KLDEAVAEAHLGK	L
1D-3	26	sp|Q01518|CAP1_HUMAN	sp	Q01518	CAP1_HUMAN	Adenylyl cyclase-associated protein 1 OS=Homo sapiens GN=CAP1 PE=1 SV=5	261	52325	10	10	6	6	16.2	1244	1	1	1	567.268	1132.52	2	1132.52	0.003	0	30.19	0.03	M	ADMQNLVER	L	Acetyl (Protein N-term); Oxidation (M)
1D-6,2D-65	122	sp|Q9HDC9|APMAP_HUMAN	sp	Q9HDC9	APMAP_HUMAN	Adipocyte plasma membrane-associated protein OS=Homo sapiens GN=APMAP PE=1 SV=2	63	46622	2	2	2	2	5.5	1644	1	1	1	622.829	1243.64	2	1243.64	0.0023	0	32.2	0.033	K	LENGEIETIAR	F
1D-2,2D-21,2D-27	72	sp|P05141|ADT2_HUMAN	sp	P05141	ADT2_HUMAN	ADP/ATP translocase 2 OS=Homo sapiens GN=SLC25A5 PE=1 SV=7	150	33059	6	6	3	3	11.7	1092	1	1	1	610.336	1218.66	2	1218.66	-0.0028	0	74.42	1.7e-06	K	DFLAGGVAAAISK	T
1D-2,2D-25,2D-26	69	sp|P12236|ADT3_HUMAN	sp	P12236	ADT3_HUMAN	ADP/ATP translocase 3 OS=Homo sapiens GN=SLC25A6 PE=1 SV=4	63	33073	2	2	1	1	4.4	1345	1	1	1	617.347	1232.68	2	1232.68	0.0026	0	63.23	2.1e-05	K	DFLAGGIAAAISK	T
1D-1	194	sp|Q9NVJ2|ARL8B_HUMAN	sp	Q9NVJ2	ARL8B_HUMAN	ADP-ribosylation factor-like protein 8B OS=Homo sapiens GN=ARL8B PE=1 SV=1	31	21753	1	1	1	1	7.5	2706	1	1	1	754.383	1506.75	2	1506.75	0.0012	0	31.28	0.036	R	GVNAIVYMIDAADR	E
1D-4,2D-45,2D-47	33	sp|P05091|ALDH2_HUMAN	sp	P05091	ALDH2_HUMAN	Aldehyde dehydrogenase, mitochondrial OS=Homo sapiens GN=ALDH2 PE=1 SV=2	350	56859	12	12	6	6	16.4	3830	1	1	1	922.536	1843.06	2	1843.05	0.0116	0	56.16	5.4e-05	K	VAEQTPLTALYVANLIK	E
1D-3,2D-35	88	sp|P05187|PPB1_HUMAN	sp	P05187	PPB1_HUMAN	Alkaline phosphatase, placental type OS=Homo sapiens GN=ALPP PE=1 SV=2	62	58259	2	2	2	2	3.7	1257	1	1	1	564.796	1127.58	2	1127.58	0.0012	0	31.23	0.033	R	GFFLFVEGGR	I
1D-3,2D-37	24	sp|P10696|PPBN_HUMAN	sp	P10696	PPBN_HUMAN	Alkaline phosphatase, placental-like OS=Homo sapiens GN=ALPPL2 PE=1 SV=4	438	57626	13	13	7	7	22.6	768	1	1	1	564.798	1127.58	2	1127.58	0.0054	0	54.64	0.00015	R	GFFLFVEGGR	I
1D-6,2D-61	208	sp|Q495W5|FUT11_HUMAN	sp	Q495W5	FUT11_HUMAN	Alpha-(1,3)-fucosyltransferase 11 OS=Homo sapiens GN=FUT11 PE=1 SV=1	30	56294	1	1	1	1	2	1346	2	0	1	593.321	1184.63	2	1184.62	0.0077	0	30.07	0.051	R	LFNLTSTFSR	H
1D-6,2D-65	25	sp|P01009|A1AT_HUMAN	sp	P01009	A1AT_HUMAN	Alpha-1-antitrypsin OS=Homo sapiens GN=SERPINA1 PE=1 SV=3	219	46878	7	7	4	4	12.9	636	1	1	1	508.312	1014.61	2	1014.61	0.0021	0	28.5	0.051	K	SVLGQLGITK	V
1D-3,2D-35	113	sp|P01023|A2MG_HUMAN	sp	P01023	A2MG_HUMAN	Alpha-2-macroglobulin OS=Homo sapiens GN=A2M PE=1 SV=3	85	164613	3	3	2	2	1.6	526	1	1	1	523.802	1045.59	2	1045.58	0.0076	0	35.36	0.014	K	FEVQVTVPK	I
1D-3,1D-5,1D-8,2D-34,2D-55,2D-87	3	sp|P12814|ACTN1_HUMAN	sp	P12814	ACTN1_HUMAN	Alpha-actinin-1 OS=Homo sapiens GN=ACTN1 PE=1 SV=2	1282	103563	63	62	23	23	32.6	177	1	0	0	432.746	863.477	2	863.475	0.0022	0	41.7	0.0028	K	ALDFIASK	G
1D-3,1D-5,1D-8,2D-31,2D-52,2D-85	30	sp|P35609|ACTN2_HUMAN	sp	P35609	ACTN2_HUMAN	Alpha-actinin-2 OS=Homo sapiens GN=ACTN2 PE=1 SV=1	409	104358	25	24	7	7	10.2	3402	1	0	0	439.213	1752.82	4	1752.82	0.0034	1	30.8	0.027	R	KHEAFESDLAAHQDR	V
1D-3,1D-5,1D-8,2D-34,2D-53,2D-82	76	sp|O43707|ACTN4_HUMAN	sp	O43707	ACTN4_HUMAN	Alpha-actinin-4 OS=Homo sapiens GN=ACTN4 PE=1 SV=2	145	105245	5	5	2	2	3.2	2088	1	1	1	769.391	1536.77	2	1536.77	-0.0005	0	51.98	0.00029	R	FAIQDISVEETSAK	E
1D-8	95	sp|P49419|AL7A1_HUMAN	sp	P49419	AL7A1_HUMAN	Alpha-aminoadipic semialdehyde dehydrogenase OS=Homo sapiens GN=ALDH7A1 PE=1 SV=5	35	59020	2	2	1	1	2.6	1945	1	1	1	672.893	1343.77	2	1343.77	0.0044	0	34.55	0.011	K	GAPTTSLISVAVTK	I
1D-7,2D-75	50	sp|P06733|ENOA_HUMAN	sp	P06733	ENOA_HUMAN	Alpha-enolase OS=Homo sapiens GN=ENO1 PE=1 SV=2	96	47481	3	3	1	1	5.1	3616	1	1	1	1177.09	2352.17	2	2352.15	0.0135	0	96	9.8e-09	R	SGETEDTFIADLVVGLCTGQIK	T
1D-6	181	sp|Q9NZD4|AHSP_HUMAN	sp	Q9NZD4	AHSP_HUMAN	Alpha-hemoglobin-stabilizing protein OS=Homo sapiens GN=AHSP PE=1 SV=1	28	11833	1	0	1	0	7.8	354	1	1	1	452.751	903.487	2	903.521	-0.0337	1	28.21	0.087	-	MALLKANK	D	Oxidation (M)
1D-8	153	sp|P17050|NAGAB_HUMAN	sp	P17050	NAGAB_HUMAN	Alpha-N-acetylgalactosaminidase OS=Homo sapiens GN=NAGA PE=1 SV=2	53	47047	2	2	1	1	4.1	4028	1	1	1	981.508	1961	2	1961	0.0061	0	41.64	0.0029	R	TISAQNMDILQNPLMIK	I	2 Oxidation (M)
1D-5,2D-55,2D-57	6	sp|P21397|AOFA_HUMAN	sp	P21397	AOFA_HUMAN	Amine oxidase [flavin-containing] A OS=Homo sapiens GN=MAOA PE=1 SV=1	868	60157	44	42	15	14	42.7	816	1	1	1	574.307	1146.6	2	1146.6	0.0034	0	40.69	0.0048	R	IMDLLGDQVK	L	Oxidation (M)
1D-5,2D-53,2D-57	127	sp|P15144|AMPN_HUMAN	sp	P15144	AMPN_HUMAN	Aminopeptidase N OS=Homo sapiens GN=ANPEP PE=1 SV=4	34	109870	1	1	1	1	1.2	2637	1	1	1	734.397	1466.78	2	1466.78	0.0025	0	33.92	0.017	R	YLSYTLNPDLIR	K
1D-5,2D-58,2D-59	91	sp|Q6Q4G3|AMPQ_HUMAN	sp	Q6Q4G3	AMPQ_HUMAN	Aminopeptidase Q OS=Homo sapiens GN=AQPEP PE=1 SV=4	117	113781	3	3	2	2	3.3	2924	1	1	1	910.957	1819.9	2	1819.89	0.0109	0	57.74	8.6e-05	K	TSEIQELFDIFTYSK	G
1D-8,2D-81,2D-82	66	sp|P12821|ACE_HUMAN	sp	P12821	ACE_HUMAN	Angiotensin-converting enzyme OS=Homo sapiens GN=ACE PE=1 SV=1	70	150418	3	3	2	2	1.9	829	1	1	1	542.822	1083.63	2	1083.63	0.0003	0	31.22	0.023	R	TLGSANLPLAK	R
1D-1,2D-1,2D-3	169	sp|Q8IZ07|AN13A_HUMAN	sp	Q8IZ07	AN13A_HUMAN	Ankyrin repeat domain-containing protein 13A OS=Homo sapiens GN=ANKRD13A PE=1 SV=3	29	67976	1	1	1	1	1.9	2012	2	0	1	651.377	1300.74	2	1300.75	-0.0136	1	28.61	0.05	R	LTLDLMKPKSR	E
1D-1,2D-5,2D-8	213	sp|E5RJM6|ANR65_HUMAN	sp	E5RJM6	ANR65_HUMAN	Ankyrin repeat domain-containing protein 65 OS=Homo sapiens GN=ANKRD65 PE=2 SV=2	29	41586	1	1	1	1	2	397	2	0	1	471.312	940.61	2	940.571	0.0391	0	29.47	0.013	R	VAELLLQR	G
1D-1,2D-3,2D-9	108	sp|P16157|ANK1_HUMAN	sp	P16157	ANK1_HUMAN	Ankyrin-1 OS=Homo sapiens GN=ANK1 PE=1 SV=3	118	207334	5	5	3	3	2.6	1062	1	1	1	551.771	1101.53	2	1101.52	0.0033	0	39.8	0.0039	K	HGVMVDATTR	M	Oxidation (M)
1D-3,2D-31,2D-32	11	sp|P04083|ANXA1_HUMAN	sp	P04083	ANXA1_HUMAN	Annexin A1 OS=Homo sapiens GN=ANXA1 PE=1 SV=2	397	38918	18	18	9	9	28	1453	1	1	1	607.271	1212.53	2	1212.53	0.0018	0	39.49	0.0018	K	DITSDTSGDFR	N
1D-3,2D-35,2D-37	167	sp|P50995|ANX11_HUMAN	sp	P50995	ANX11_HUMAN	Annexin A11 OS=Homo sapiens GN=ANXA11 PE=1 SV=1	45	54697	2	2	1	1	2.2	2087	1	1	1	669.373	1336.73	2	1336.73	0.0044	0	33.27	0.017	K	TPVLFDIYEIK	E
1D-3,2D-32,2D-33	11	sp|P07355|ANXA2_HUMAN	sp	P07355	ANXA2_HUMAN	Annexin A2 OS=Homo sapiens GN=ANXA2 PE=1 SV=2	680	38808	32	31	15	15	49	2101	1	1	1	771.93	1541.85	2	1541.84	0.0049	0	34.69	0.014	K	GVDEVTIVNILTNR	S
1D-3,2D-35,2D-36	141	sp|P12429|ANXA3_HUMAN	sp	P12429	ANXA3_HUMAN	Annexin A3 OS=Homo sapiens GN=ANXA3 PE=1 SV=3	65	36524	2	2	1	1	5	3242	1	1	1	837.441	1672.87	2	1672.86	0.0045	0	52.14	0.0003	K	GAGTNEDALIEILTTR	T
1D-3,2D-36	62	sp|P09525|ANXA4_HUMAN	sp	P09525	ANXA4_HUMAN	Annexin A4 OS=Homo sapiens GN=ANXA4 PE=1 SV=4	191	36088	8	8	4	4	20.4	2496	1	1	1	833.936	1665.86	2	1665.85	0.0119	0	48.26	0.00067	K	SETSGSFEDALLAIVK	C
1D-3,2D-38	10	sp|P08133|ANXA6_HUMAN	sp	P08133	ANXA6_HUMAN	Annexin A6 OS=Homo sapiens GN=ANXA6 PE=1 SV=3	723	76168	27	27	11	11	24.5	2813	1	1	1	890.448	1778.88	2	1778.87	0.0098	1	48.27	0.00063	R	DLMTDLKSEISGDLAR	L	Oxidation (M)
1D-5,2D-55	190	sp|Q9BYT9|ANO3_HUMAN	sp	Q9BYT9	ANO3_HUMAN	Anoctamin-3 OS=Homo sapiens GN=ANO3 PE=2 SV=2	31	115666	1	1	1	1	0.6	99	1	1	1	418.735	835.456	2	835.434	0.0222	0	31.41	0.029	K	FVTQWR	R
1D-5,2D-56	229	sp|O43747|AP1G1_HUMAN	sp	O43747	AP1G1_HUMAN	AP-1 complex subunit gamma-1 OS=Homo sapiens GN=AP1G1 PE=1 SV=5	29	92148	1	0	1	0	1.2	1716	2	0	1	623.845	1245.67	2	1245.68	-0.0081	1	28.81	0.069	R	FLLNNDKNIR	Y
1D-5	181	sp|O95831|AIFM1_HUMAN	sp	O95831	AIFM1_HUMAN	Apoptosis-inducing factor 1, mitochondrial OS=Homo sapiens GN=AIFM1 PE=1 SV=1	35	67144	1	1	1	1	1.8	1176	1	1	1	571.826	1141.64	2	1141.63	0.0032	0	35.37	0.014	R	ISGLGLTPEQK	Q
1D-5	157	sp|P15289|ARSA_HUMAN	sp	P15289	ARSA_HUMAN	Arylsulfatase A OS=Homo sapiens GN=ARSA PE=1 SV=3	59	54409	2	2	1	1	3.4	3330	1	1	1	862.486	1722.96	2	1722.95	0.0049	0	48.26	0.00043	R	GGLPLEEVTVAEVLAAR	G
1D-2,2D-23,2D-24	46	sp|P00505|AATM_HUMAN	sp	P00505	AATM_HUMAN	Aspartate aminotransferase, mitochondrial OS=Homo sapiens GN=GOT2 PE=1 SV=3	107	47886	4	4	3	3	8.6	1231	1	1	1	577.768	1153.52	2	1153.52	0.0022	0	28.68	0.034	R	DAGMQLQGYR	Y	Oxidation (M)
1D-3	121	sp|Q6DD88|ATLA3_HUMAN	sp	Q6DD88	ATLA3_HUMAN	Atlastin-3 OS=Homo sapiens GN=ATL3 PE=1 SV=1	28	60960	1	1	1	1	3.5	3212	1	1	1	924.948	1847.88	2	1847.9	-0.0238	0	28.42	0.056	K	SMLQATAEANNLAAAASAK	D	Oxidation (M)
1D-3,2D-32,2D-37	177	sp|P00846|ATP6_HUMAN	sp	P00846	ATP6_HUMAN	ATP synthase subunit a OS=Homo sapiens GN=MT-ATP6 PE=1 SV=1	36	24801	1	1	1	1	4.4	1671	1	1	1	622.377	1242.74	2	1242.73	0.0055	0	36.48	0.0057	R	LITTQQWLIK	L
1D-3,2D-35,2D-37,2D-38,2D-39	5	sp|P25705|ATPA_HUMAN	sp	P25705	ATPA_HUMAN	ATP synthase subunit alpha, mitochondrial OS=Homo sapiens GN=ATP5A1 PE=1 SV=1	1013	59828	49	47	18	17	38.2	1738	1	1	1	712.344	1422.67	2	1422.67	0.0082	0	62.69	2e-05	K	TGTAEMSSILEER	I
1D-3,2D-35	33	sp|P24539|AT5F1_HUMAN	sp	P24539	AT5F1_HUMAN	ATP synthase subunit b, mitochondrial OS=Homo sapiens GN=ATP5F1 PE=1 SV=2	160	28947	5	5	3	3	12.9	806	1	1	1	529.31	1056.61	2	1056.6	0.0021	1	42.51	0.0025	K	SQQALVQKR	H
1D-3,2D-32	1	sp|P06576|ATPB_HUMAN	sp	P06576	ATPB_HUMAN	ATP synthase subunit beta, mitochondrial OS=Homo sapiens GN=ATP5B PE=1 SV=3	1396	56525	98	97	24	24	71.8	1234	1	1	1	631.826	1261.64	2	1261.63	0.0036	0	35.86	0.013	R	TIAMDGTEGLVR	G
1D-3,2D-36	98	sp|O75947|ATP5H_HUMAN	sp	O75947	ATP5H_HUMAN	ATP synthase subunit d, mitochondrial OS=Homo sapiens GN=ATP5H PE=1 SV=3	98	18537	4	4	3	3	12.4	1119	1	1	1	561.297	1120.58	2	1120.58	0.0034	1	32.62	0.028	K	AGLVDDFEKK	F
1D-3,2D-35,2D-38	164	sp|P30049|ATPD_HUMAN	sp	P30049	ATPD_HUMAN	ATP synthase subunit delta, mitochondrial OS=Homo sapiens GN=ATP5D PE=1 SV=2	38	17479	2	2	1	1	8.3	2364	1	1	1	716.359	1430.7	2	1430.7	0.0037	0	31.24	0.037	K	AQAELVGTADEATR	A
1D-3,2D-33,2D-36	140	sp|P56385|ATP5I_HUMAN	sp	P56385	ATP5I_HUMAN	ATP synthase subunit e, mitochondrial OS=Homo sapiens GN=ATP5I PE=1 SV=2	53	7928	2	2	1	1	20.3	2561	1	1	1	744.899	1487.78	2	1487.78	0.007	0	52.79	0.00025	R	YSALFLGVAYGATR	Y
1D-3,2D-37	97	sp|P56134|ATPK_HUMAN	sp	P56134	ATPK_HUMAN	ATP synthase subunit f, mitochondrial OS=Homo sapiens GN=ATP5J2 PE=1 SV=3	46	11025	2	2	1	1	13.8	2472	1	1	1	714.853	1427.69	2	1427.68	0.0075	0	45.82	0.001	R	DFSPSGIFGAFQR	G
1D-3,2D-36	123	sp|O75964|ATP5L_HUMAN	sp	O75964	ATP5L_HUMAN	ATP synthase subunit g, mitochondrial OS=Homo sapiens GN=ATP5L PE=1 SV=3	76	11421	4	4	2	2	27.2	1727	1	1	1	709.407	1416.8	2	1416.8	0.0024	0	29.24	0.042	K	VELVPPTPAEIPR	A
1D-3,2D-32,2D-33,2D-34,2D-35	30	sp|P36542|ATPG_HUMAN	sp	P36542	ATPG_HUMAN	ATP synthase subunit gamma, mitochondrial OS=Homo sapiens GN=ATP5C1 PE=1 SV=1	181	33032	12	12	4	4	16.4	965	1	1	1	548.808	1095.6	2	1095.6	-0.0018	0	34.25	0.013	K	HLLIGVSSDR	G
1D-3,2D-37,2D-38	104	sp|P48047|ATPO_HUMAN	sp	P48047	ATPO_HUMAN	ATP synthase subunit O, mitochondrial OS=Homo sapiens GN=ATP5O PE=1 SV=1	98	23377	3	3	2	2	13.1	856	1	1	1	580.841	1159.67	2	1159.66	0.008	0	48.22	0.00052	K	VAASVLNPYVK	R
1D-3	178	sp|Q9UNQ0|ABCG2_HUMAN	sp	Q9UNQ0	ABCG2_HUMAN	ATP-binding cassette sub-family G member 2 OS=Homo sapiens GN=ABCG2 PE=1 SV=3	38	72952	1	1	1	1	1.5	744	1	1	1	522.808	1043.6	2	1043.6	0.004	0	37.65	0.0075	K	SSLLDVLAAR	K
1D-3,2D-38	149	sp|P53396|ACLY_HUMAN	sp	P53396	ACLY_HUMAN	ATP-citrate synthase OS=Homo sapiens GN=ACLY PE=1 SV=3	49	121674	2	2	1	1	1.4	2815	1	1	1	784.46	1566.91	2	1566.9	0.0082	0	48.79	0.0003	R	TIAIIAEGIPEALTR	K
1D-4	218	sp|P29374|ARI4A_HUMAN	sp	P29374	ARI4A_HUMAN	AT-rich interactive domain-containing protein 4A OS=Homo sapiens GN=ARID4A PE=1 SV=3	29	143634	1	0	1	0	0.6	153	1	1	1	422.762	843.509	2	843.481	0.0272	0	28.83	0.064	R	VGAIVETR	T
1D-5,2D-52,2D-57	98	sp|P02730|B3AT_HUMAN	sp	P02730	B3AT_HUMAN	Band 3 anion transport protein OS=Homo sapiens GN=SLC4A1 PE=1 SV=3	131	102013	6	6	3	3	4.4	2688	1	1	1	745.907	1489.8	2	1489.79	0.0065	0	39.66	0.0051	R	ADFLEQPVLGFVR	L
1D-9,2D-95,2D-97	90	sp|P50895|BCAM_HUMAN	sp	P50895	BCAM_HUMAN	Basal cell adhesion molecule OS=Homo sapiens GN=BCAM PE=1 SV=2	139	68161	4	4	2	2	4.3	2402	1	1	1	717.383	1432.75	2	1432.74	0.0067	0	32.91	0.024	R	VAYLDPLELSEGK	V
1D-6,2D-63,2D-65	48	sp|P35613|BASI_HUMAN	sp	P35613	BASI_HUMAN	Basigin OS=Homo sapiens GN=BSG PE=1 SV=2	263	42573	11	11	5	5	17.1	3989	1	1	1	647.658	1939.95	3	1939.95	0.0029	1	31.1	0.034	R	RKPEDVLDDDDAGSAPLK	S
1D-6,2D-61,2D-67	121	sp|P51572|BAP31_HUMAN	sp	P51572	BAP31_HUMAN	B-cell receptor-associated protein 31 OS=Homo sapiens GN=BCAP31 PE=1 SV=3	77	28031	2	2	2	2	9.3	2653	1	1	1	857.936	1713.86	2	1713.85	0.0045	1	43	0.0023	K	LDVGNAEVKLEEENR	S
1D-3,2D-66,2D-67	203	sp|P15291|B4GT1_HUMAN	sp	P15291	B4GT1_HUMAN	Beta-1,4-galactosyltransferase 1 OS=Homo sapiens GN=B4GALT1 PE=1 SV=5	32	44291	1	1	1	1	2	368	1	1	1	464.804	927.594	2	927.591	0.0037	0	32.08	0.013	K	VAIIIPFR	N
1D-6,2D-61,2D-62	204	sp|O43286|B4GT5_HUMAN	sp	O43286	B4GT5_HUMAN	Beta-1,4-galactosyltransferase 5 OS=Homo sapiens GN=B4GALT5 PE=2 SV=1	32	45318	1	1	1	1	2.1	368	1	0	1	464.804	927.594	2	927.591	0.0037	0	32.08	0.013	K	VAILIPFR	N
1D-5,2D-53	78	sp|P02749|APOH_HUMAN	sp	P02749	APOH_HUMAN	Beta-2-glycoprotein 1 OS=Homo sapiens GN=APOH PE=1 SV=3	162	39584	7	6	4	4	17.7	4498	1	1	1	796.008	2385	3	2384.99	0.012	0	40.98	0.00087	K	ATFGCHDGYSLDGPEEIECTK	L
1D-4,2D-45,2D-47,2D-48,2D-49	129	sp|P61769|B2MG_HUMAN	sp	P61769	B2MG_HUMAN	Beta-2-microglobulin OS=Homo sapiens GN=B2M PE=1 SV=1	41	13820	1	1	1	1	7.6	1014	1	1	1	546.297	1090.58	2	1090.61	-0.0332	1	40.54	0.0047	R	TPKIQVYSR	H
1D-1	63	sp|Q562R1|ACTBL_HUMAN	sp	Q562R1	ACTBL_HUMAN	Beta-actin-like protein 2 OS=Homo sapiens GN=ACTBL2 PE=1 SV=2	188	42318	14	13	4	4	12.8	2856	1	0	0	895.956	1789.9	2	1789.88	0.0126	0	80.35	4.5e-07	R	SYELPDGQVITIGNER	F
1D-7,2D-75	83	sp|P08236|BGLR_HUMAN	sp	P08236	BGLR_HUMAN	Beta-glucuronidase OS=Homo sapiens GN=GUSB PE=1 SV=2	73	75027	2	2	2	2	5.1	3301	1	1	1	723.361	2167.06	3	2167.05	0.0081	0	33.2	0.02	K	SLDPSRPVTFVSNSNYAADK	G
1D-5,2D-51,2D-57	216	sp|P06865|HEXA_HUMAN	sp	P06865	HEXA_HUMAN	Beta-hexosaminidase subunit alpha OS=Homo sapiens GN=HEXA PE=1 SV=2	29	61120	1	0	1	0	1.3	236	1	1	1	440.233	878.451	2	878.45	0.0015	0	28.51	0.068	K	EVIEYAR	L
1D-5,2D-54,2D-57	87	sp|P07686|HEXB_HUMAN	sp	P07686	HEXB_HUMAN	Beta-hexosaminidase subunit beta OS=Homo sapiens GN=HEXB PE=1 SV=3	94	63527	4	4	2	2	4.5	1010	1	1	1	550.341	1098.67	2	1098.66	0.0032	0	38.48	0.0039	K	VLDIIATINK	G
1D-3,2D-31	100	sp|Q13867|BLMH_HUMAN	sp	Q13867	BLMH_HUMAN	Bleomycin hydrolase OS=Homo sapiens GN=BLMH PE=1 SV=1	98	53155	3	3	2	2	5.5	3037	1	1	1	809.404	1616.79	2	1616.79	0.0062	0	66.17	1.1e-05	K	LYTVEYLSNMVGGR	K	Oxidation (M)
1D-3,2D-33,2D-37,2D-38,2D-39	123	sp|Q10589|BST2_HUMAN	sp	Q10589	BST2_HUMAN	Bone marrow stromal antigen 2 OS=Homo sapiens GN=BST2 PE=1 SV=1	82	20041	4	4	2	2	13.9	1127	1	1	1	559.279	1116.54	2	1116.54	0.0026	0	30.94	0.035	K	LQDASAEVER	L
1D-2,2D-22	165	sp|P80723|BASP1_HUMAN	sp	P80723	BASP1_HUMAN	Brain acid soluble protein 1 OS=Homo sapiens GN=BASP1 PE=1 SV=2	36	22680	1	1	1	1	6.2	2224	1	1	1	693.844	1385.67	2	1385.67	0.0056	0	36.11	0.0097	K	ETPAATEAPSSTPK	A
1D-2,2D-22,2D-23	177	sp|O15382|BCAT2_HUMAN	sp	O15382	BCAT2_HUMAN	Branched-chain-amino-acid aminotransferase, mitochondrial OS=Homo sapiens GN=BCAT2 PE=1 SV=2	37	44658	1	1	1	1	4.1	3074	1	1	1	621.67	1861.99	3	1861.97	0.0162	0	37.24	0.0077	R	NLHIPTMENGPELILR	F	Oxidation (M)
1D-3,2D-35	181	sp|Q96CX2|KCD12_HUMAN	sp	Q96CX2	KCD12_HUMAN	BTB/POZ domain-containing protein KCTD12 OS=Homo sapiens GN=KCTD12 PE=1 SV=1	36	35964	2	2	1	1	3.1	1659	1	1	1	629.811	1257.61	2	1257.6	0.0049	0	36.27	0.0091	K	FNFLEQAFDK	L
1D-4,2D-41,2D-42,2D-44,2D-45	151	sp|P55290|CAD13_HUMAN	sp	P55290	CAD13_HUMAN	Cadherin-13 OS=Homo sapiens GN=CDH13 PE=1 SV=1	49	78694	1	1	1	1	1.7	1823	1	1	1	638.83	1275.65	2	1275.64	0.0044	0	49.13	0.00065	R	INENTGSVSVTR	T
1D-4,2D-45	102	sp|O75746|CMC1_HUMAN	sp	O75746	CMC1_HUMAN	Calcium-binding mitochondrial carrier protein Aralar1 OS=Homo sapiens GN=SLC25A12 PE=1 SV=2	97	75114	3	3	3	3	4.9	536	1	0	0	482.269	962.523	2	962.519	0.0041	0	30.82	0.036	K	LTVNDFVR	D
1D-4,2D-45	108	sp|Q9UJS0|CMC2_HUMAN	sp	Q9UJS0	CMC2_HUMAN	Calcium-binding mitochondrial carrier protein Aralar2 OS=Homo sapiens GN=SLC25A13 PE=1 SV=2	29	74528	1	1	1	1	2.7	2850	1	1	1	985.025	1968.04	2	1968.03	0.0048	0	28.57	0.055	R	IAPLEEGTLPFNLAEAQR	Q
1D-4,2D-43,2D-45	123	sp|P27824|CALX_HUMAN	sp	P27824	CALX_HUMAN	Calnexin OS=Homo sapiens GN=CANX PE=1 SV=2	28	67982	1	0	1	0	2	1803	1	1	1	651.366	1300.72	2	1300.72	0.0009	1	28.35	0.065	K	LPGDKGLVLMSR	A	Oxidation (M)
1D-4,2D-45,2D-47	115	sp|Q9Y6Q1|CAN6_HUMAN	sp	Q9Y6Q1	CAN6_HUMAN	Calpain-6 OS=Homo sapiens GN=CAPN6 PE=1 SV=2	29	75384	1	1	1	1	2	2496	1	1	1	762.412	1522.81	2	1522.8	0.0067	0	29.01	0.05	K	YANETVNPYLVIK	C
1D-3,2D-31	119	sp|Q7LFX5|CHSTF_HUMAN	sp	Q7LFX5	CHSTF_HUMAN	Carbohydrate sulfotransferase 15 OS=Homo sapiens GN=CHST15 PE=1 SV=1	36	65569	1	1	1	1	2	1662	2	0	1	651.378	1300.74	2	1300.72	0.0234	0	38.95	0.0046	K	QMNLLAVLEVR	T	Oxidation (M)
1D-3,2D-36,2D-37	162	sp|P15086|CBPB1_HUMAN	sp	P15086	CBPB1_HUMAN	Carboxypeptidase B OS=Homo sapiens GN=CPB1 PE=1 SV=4	30	47737	1	1	1	1	2.6	1922	2	0	1	641.831	1281.65	2	1281.63	0.0206	0	29.53	0.044	R	ATCEETFLAIK	Y
1D-3,2D-32,2D-37,2D-38	201	sp|Q9UBD9|CLCF1_HUMAN	sp	Q9UBD9	CLCF1_HUMAN	Cardiotrophin-like cytokine factor 1 OS=Homo sapiens GN=CLCF1 PE=1 SV=1	32	25388	1	1	1	1	3.6	160	1	1	1	428.767	855.519	2	855.481	0.0374	0	32.23	0.018	R	LGAETLPR	A
1D-7,2D-71,2D-73	159	sp|P23786|CPT2_HUMAN	sp	P23786	CPT2_HUMAN	Carnitine O-palmitoyltransferase 2, mitochondrial OS=Homo sapiens GN=CPT2 PE=1 SV=2	34	74244	2	2	1	1	1.5	1291	1	1	1	582.321	1162.63	2	1162.62	0.0031	0	33.73	0.02	K	LNFELTDALK	T
1D-7,2D-71,2D-72,2D-73,2D-74,	70	sp|P04040|CATA_HUMAN	sp	P04040	CATA_HUMAN	Catalase OS=Homo sapiens GN=CAT PE=1 SV=3	91	59947	4	4	2	2	6.8	2691	1	1	1	741.374	1480.73	2	1480.73	0.0014	0	58.69	5.8e-05	R	AFYVNVLNEEQR	K
1D-8,2D-82,2D-83	152	sp|P21964|COMT_HUMAN	sp	P21964	COMT_HUMAN	Catechol O-methyltransferase OS=Homo sapiens GN=COMT PE=1 SV=2	49	30474	1	1	1	1	5.5	3586	1	1	1	902.982	1803.95	2	1803.94	0.0064	0	48.99	0.00056	R	YLPDTLLLEECGLLR	K
1D-8,2D-82,2D-87	180	sp|P11717|MPRI_HUMAN	sp	P11717	MPRI_HUMAN	Cation-independent mannose-6-phosphate receptor OS=Homo sapiens GN=IGF2R PE=1 SV=3	35	281155	2	2	1	1	0.4	1550	1	1	1	605.321	1208.63	2	1208.62	0.0055	0	32.17	0.025	R	ATLITFLCDR	D
1D-8,2D-81,2D-82	47	sp|Q03135|CAV1_HUMAN	sp	Q03135	CAV1_HUMAN	Caveolin-1 OS=Homo sapiens GN=CAV1 PE=1 SV=4	106	20630	4	4	2	2	12.4	367	1	1	1	470.249	938.484	2	938.482	0.0015	0	38.16	0.0052	K	HLNDDVVK	I
1D-5,2D-51	163	sp|P48509|CD151_HUMAN	sp	P48509	CD151_HUMAN	CD151 antigen OS=Homo sapiens GN=CD151 PE=1 SV=3	40	29132	1	1	1	1	3.6	704	1	1	1	502.273	1002.53	2	1002.53	0.0026	0	39.7	0.006	K	TVVALCGQR	D
1D-5	159	sp|Q5ZPR3|CD276_HUMAN	sp	Q5ZPR3	CD276_HUMAN	CD276 antigen OS=Homo sapiens GN=CD276 PE=1 SV=1	45	57941	1	1	1	1	3.4	4004	1	1	1	664.35	1990.03	3	1990.02	0.0041	0	45.31	0.0012	R	NPVLQQDAHSSVTITPQR	S
1D-5,2D-55,2D-57	139	sp|Q96JB5|CK5P3_HUMAN	sp	Q96JB5	CK5P3_HUMAN	CDK5 regulatory subunit-associated protein 3 OS=Homo sapiens GN=CDK5RAP3 PE=1 SV=2	58	57227	2	2	1	1	2.8	2896	1	1	1	789.91	1577.81	2	1577.79	0.0128	0	38.25	0.0068	R	GPDALTLLEYTETR	N
1D-5,2D-52,2D-57,2D-58	99	sp|O14735|CDIPT_HUMAN	sp	O14735	CDIPT_HUMAN	CDP-diacylglycerol--inositol 3-phosphatidyltransferase OS=Homo sapiens GN=CDIPT PE=1 SV=1	33	23865	1	1	1	1	5.2	1505	1	1	1	615.831	1229.65	2	1229.64	0.004	0	33.21	0.026	K	MIDLSGNPVLR	I	Oxidation (M)
1D-6,2D-61,2D-62,2D-65	143	sp|Q9BY67|CADM1_HUMAN	sp	Q9BY67	CADM1_HUMAN	Cell adhesion molecule 1 OS=Homo sapiens GN=CADM1 PE=1 SV=2	64	48935	4	4	1	1	6.1	4762	1	1	1	757.385	3025.51	4	3025.5	0.0077	1	43.98	0.0013	K	VHKEDDGVPVICQVEHPAVTGNLQTQR	Y
1D-6,2D-63,2D-67	123	sp|Q4KMG0|CDON_HUMAN	sp	Q4KMG0	CDON_HUMAN	Cell adhesion molecule-related/down-regulated by oncogenes OS=Homo sapiens GN=CDON PE=1 SV=2	35	140656	1	1	1	1	1.1	2522	2	0	1	718.844	1435.67	2	1435.72	-0.0468	0	34.71	0.012	R	DGSETGLLSSFPVK	V
1D-6,2D-65	186	sp|P60953|CDC42_HUMAN	sp	P60953	CDC42_HUMAN	Cell division control protein 42 homolog OS=Homo sapiens GN=CDC42 PE=1 SV=2	36	21587	4	3	1	1	8.9	3798	1	1	1	618.331	1851.97	3	1851.96	0.0082	0	28.74	0.054	K	NVFDEAILAALEPPEPK	K
1D-5,2D-53	113	sp|P43121|MUC18_HUMAN	sp	P43121	MUC18_HUMAN	Cell surface glycoprotein MUC18 OS=Homo sapiens GN=MCAM PE=1 SV=2	68	72532	2	2	2	2	4	2968	1	1	1	800.424	1598.83	2	1598.83	0.0072	0	36.85	0.0094	R	GATLALTQVTPQDER	I
1D-5,2D-53	205	sp|Q7Z7A1|CNTRL_HUMAN	sp	Q7Z7A1	CNTRL_HUMAN	Centriolin OS=Homo sapiens GN=CNTRL PE=1 SV=2	29	269860	1	1	1	1	0.3	474	1	1	1	471.791	941.568	2	941.602	-0.0339	1	32	0.021	K	SLRVLNLK	G
1D-5,2D-57	110	sp|P49454|CENPF_HUMAN	sp	P49454	CENPF_HUMAN	Centromere protein F OS=Homo sapiens GN=CENPF PE=1 SV=2	30	370844	1	1	1	1	0.3	1128	2	0	1	565.782	1129.55	2	1129.51	0.0349	1	29.53	0.044	K	MDKMSFVEK	V	Oxidation (M)
1D-5,2D-56	132	sp|Q66GS9|CP135_HUMAN	sp	Q66GS9	CP135_HUMAN	Centrosomal protein of 135 kDa OS=Homo sapiens GN=CEP135 PE=1 SV=2	32	133864	1	1	1	1	0.9	1430	2	0	1	616.843	1231.67	2	1231.67	0.0002	2	31.77	0.033	R	RIMAEKEALR	E	Oxidation (M)
1D-5,2D-52,2D-54,2D-57	205	sp|O15078|CE290_HUMAN	sp	O15078	CE290_HUMAN	Centrosomal protein of 290 kDa OS=Homo sapiens GN=CEP290 PE=1 SV=2	31	290892	1	1	1	1	0.3	707	1	1	1	515.284	1028.55	2	1028.54	0.016	1	30.73	0.044	R	FKEMAIFK	I	Oxidation (M)
1D-5	26	sp|P05108|CP11A_HUMAN	sp	P05108	CP11A_HUMAN	Cholesterol side-chain cleavage enzyme, mitochondrial OS=Homo sapiens GN=CYP11A1 PE=1 SV=2	207	60178	9	9	5	5	12.5	452	1	1	1	486.768	971.521	2	971.519	0.0026	0	30.03	0.055	R	DFVSVLHR	R
1D-6,2D-61	208	sp|Q8WWI5|CTL1_HUMAN	sp	Q8WWI5	CTL1_HUMAN	Choline transporter-like protein 1 OS=Homo sapiens GN=SLC44A1 PE=1 SV=1	29	74793	1	1	1	1	2.1	2871	1	1	1	516.963	1547.87	3	1547.86	0.0047	0	29.46	0.035	K	LPVPASAPIPFFHR	C
1D-6,2D-62	82	sp|Q8IWA5|CTL2_HUMAN	sp	Q8IWA5	CTL2_HUMAN	Choline transporter-like protein 2 OS=Homo sapiens GN=SLC44A2 PE=1 SV=3	121	81610	7	7	3	3	5	427	1	1	1	479.278	956.542	2	956.54	0.0019	1	32.99	0.022	K	KANGVLEAR	Q
1D-6,2D-65,2D-67	190	sp|Q53GD3|CTL4_HUMAN	sp	Q53GD3	CTL4_HUMAN	Choline transporter-like protein 4 OS=Homo sapiens GN=SLC44A4 PE=2 SV=2	33	80741	1	1	1	1	1.1	694	1	0	1	514.275	1026.54	2	1026.5	0.0364	0	33.21	0.017	K	NAFMLLMR	N	2 Oxidation (M)
1D-5	60	sp|Q6UVK1|CSPG4_HUMAN	sp	Q6UVK1	CSPG4_HUMAN	Chondroitin sulfate proteoglycan 4 OS=Homo sapiens GN=CSPG4 PE=1 SV=2	70	251067	2	1	2	1	1.2	2049	1	1	1	690.356	1378.7	2	1378.69	0.0056	0	43.9	0.002	K	SPPSAGYLVMVSR	G	Oxidation (M)
1D-5	131	sp|O75390|CISY_HUMAN	sp	O75390	CISY_HUMAN	Citrate synthase, mitochondrial OS=Homo sapiens GN=CS PE=1 SV=2	76	51908	2	2	1	1	3.4	3442	1	1	1	881.949	1761.88	2	1761.88	0.006	0	53.69	0.0002	K	GLVYETSVLDPDEGIR	F
1D-4,2D-44,2D-47	111	sp|Q00610|CLH1_HUMAN	sp	Q00610	CLH1_HUMAN	Clathrin heavy chain 1 OS=Homo sapiens GN=CLTC PE=1 SV=5	29	193260	1	1	1	1	0.6	1588	1	1	1	626.837	1251.66	2	1251.65	0.006	0	29.47	0.047	K	TLQIFNIEMK	S	Oxidation (M)
1D-5,2D-58,2D-57	160	sp|P10909|CLUS_HUMAN	sp	P10909	CLUS_HUMAN	Clusterin OS=Homo sapiens GN=CLU PE=1 SV=1	38	53031	1	1	1	1	2.7	2258	1	1	1	697.354	1392.69	2	1392.69	0.0052	0	38.03	0.0075	R	ASSIIDELFQDR	F
1D-8,2D-81,2D-82	189	sp|P00451|FA8_HUMAN	sp	P00451	FA8_HUMAN	Coagulation factor VIII OS=Homo sapiens GN=F8 PE=1 SV=1	34	268323	1	1	1	1	0.6	2668	2	0	1	762.412	1522.81	2	1522.77	0.0419	1	33.8	0.017	K	YKWTVTVEDGPTK	S
1D-8,2D-83,2D-87,2D-88	87	sp|P00488|F13A_HUMAN	sp	P00488	F13A_HUMAN	Coagulation factor XIII A chain OS=Homo sapiens GN=F13A1 PE=1 SV=4	126	83728	5	5	3	3	5.6	1450	1	1	1	663.919	1325.82	2	1325.82	0.0075	0	40.74	0.00092	K	STVLTIPEIIIK	V
1D-4,2D-48	196	sp|Q9UBF2|COPG2_HUMAN	sp	Q9UBF2	COPG2_HUMAN	Coatomer subunit gamma-2 OS=Homo sapiens GN=COPG2 PE=1 SV=1	31	98700	1	1	1	1	1.4	1649	1	1	1	622.899	1243.78	2	1243.78	0.0091	0	30.66	0.005	R	SIATLAITTLLK	T
1D-4,2D-47,2D-49	198	sp|P23528|COF1_HUMAN	sp	P23528	COF1_HUMAN	Cofilin-1 OS=Homo sapiens GN=CFL1 PE=1 SV=3	33	18719	1	1	1	1	7.2	1246	1	1	1	572.816	1143.62	2	1143.61	0.0035	0	32.72	0.029	M	ASGVAVSDGVIK	V	Acetyl (Protein N-term)
1D-5,2D-51,2D-52,2D-54	153	sp|Q8NEF3|CC112_HUMAN	sp	Q8NEF3	CC112_HUMAN	Coiled-coil domain-containing protein 112 OS=Homo sapiens GN=CCDC112 PE=2 SV=2	32	53589	1	1	1	1	2	1112	1	1	1	557.255	1112.49	2	1112.52	-0.0259	1	32.46	0.011	K	QKSIEMSMK	C	2 Oxidation (M)
1D-5,2D-52,2D-53	239	sp|Q8NCX0|CC150_HUMAN	sp	Q8NCX0	CC150_HUMAN	Coiled-coil domain-containing protein 150 OS=Homo sapiens GN=CCDC150 PE=2 SV=2	30	129536	1	0	1	0	1.3	2891	2	0	1	794.404	1586.79	2	1586.85	-0.0514	1	29.82	0.054	K	MQGALEKVQIELGR	R	Oxidation (M)
1D-5,2D-55,2D-57	213	sp|Q9NVE4|CCD87_HUMAN	sp	Q9NVE4	CCD87_HUMAN	Coiled-coil domain-containing protein 87 OS=Homo sapiens GN=CCDC87 PE=2 SV=2	29	96741	1	1	1	1	0.8	116	1	0	1	421.759	841.504	2	841.502	0.0017	1	28.61	0.046	K	ELKSIPR	L
1D-9,2D-95,2D-97	152	sp|P01024|CO3_HUMAN	sp	P01024	CO3_HUMAN	Complement C3 OS=Homo sapiens GN=C3 PE=1 SV=2	40	188569	1	1	1	1	1	3570	1	1	1	908.954	1815.89	2	1815.88	0.0089	0	40.11	0.0045	R	SNLDEDIIAEENIVSR	S
1D-9,2D-95	41	sp|P80365|DHI2_HUMAN	sp	P80365	DHI2_HUMAN	Corticosteroid 11-beta-dehydrogenase isozyme 2 OS=Homo sapiens GN=HSD11B2 PE=1 SV=2	117	44612	5	5	3	3	10.9	87	1	1	1	413.78	825.546	2	825.544	0.0025	0	33.26	0.004	R	ALLQLLR	S
1D-9,2D-92,2D-93	108	sp|Q9BZJ0|CRNL1_HUMAN	sp	Q9BZJ0	CRNL1_HUMAN	Crooked neck-like protein 1 OS=Homo sapiens GN=CRNKL1 PE=1 SV=4	30	100902	1	1	1	1	1.2	1397	1	1	1	601.863	1201.71	2	1201.67	0.0368	2	29.94	0.028	R	VDKLMPEKVK	K	Oxidation (M)
1D-8,2D-83,2D-87	226	sp|O95319|CELF2_HUMAN	sp	O95319	CELF2_HUMAN	CUGBP Elav-like family member 2 OS=Homo sapiens GN=CELF2 PE=1 SV=1	29	54706	1	1	1	1	1.6	294	1	1	1	447.778	893.541	2	893.505	0.0364	0	29.14	0.018	K	LFIGMVSK	K
1D-8,2D-85	89	sp|Q5MAI5|CDKL4_HUMAN	sp	Q5MAI5	CDKL4_HUMAN	Cyclin-dependent kinase-like 4 OS=Homo sapiens GN=CDKL4 PE=2 SV=1	35	36656	1	1	1	1	2.5	248	2	0	1	449.279	896.543	2	896.581	-0.0381	1	34.94	0.0047	R	TLGKLIPR	H
1D-6,2D-61,2D-63	194	sp|P00156|CYB_HUMAN	sp	P00156	CYB_HUMAN	Cytochrome b OS=Homo sapiens GN=MT-CYB PE=1 SV=1	32	42816	2	2	1	1	1.8	210	1	1	1	430.258	858.501	2	858.5	0.0018	1	31.93	0.035	R	KINPLMK	L	Oxidation (M)
1D-6,2D-62,2D-65	172	sp|P04839|CY24B_HUMAN	sp	P04839	CY24B_HUMAN	Cytochrome b-245 heavy chain OS=Homo sapiens GN=CYBB PE=1 SV=2	35	66206	1	1	1	1	3	3698	1	1	1	902.985	1803.95	2	1803.94	0.0106	0	35.24	0.013	R	IGVFLCGPEALAETLSK	Q
1D-6,2D-64,2D-67	27	sp|P31930|QCR1_HUMAN	sp	P31930	QCR1_HUMAN	Cytochrome b-c1 complex subunit 1, mitochondrial OS=Homo sapiens GN=UQCRC1 PE=1 SV=3	206	53297	7	7	5	5	15.2	812	1	1	1	529.797	1057.58	2	1057.58	0.0021	0	45.95	0.0016	R	IAEVDASVVR	E
1D-6,2D-68,2D-69	39	sp|P22695|QCR2_HUMAN	sp	P22695	QCR2_HUMAN	Cytochrome b-c1 complex subunit 2, mitochondrial OS=Homo sapiens GN=UQCRC2 PE=1 SV=3	291	48584	12	10	7	6	24.5	2492	1	1	1	555.949	1664.83	3	1664.82	0.0102	0	28.05	0.069	R	YEDFSNLGTTHLLR	L
1D-6,2D-66	172	sp|P07919|QCR6_HUMAN	sp	P07919	QCR6_HUMAN	Cytochrome b-c1 complex subunit 6, mitochondrial OS=Homo sapiens GN=UQCRH PE=1 SV=2	37	11017	2	2	1	1	7.7	454	1	1	1	467.719	933.424	2	933.423	0.0019	0	36.15	0.0084	R	LELCDER	V
1D-6,2D-67	43	sp|P14927|QCR7_HUMAN	sp	P14927	QCR7_HUMAN	Cytochrome b-c1 complex subunit 7 OS=Homo sapiens GN=UQCRB PE=1 SV=2	245	13522	12	12	5	5	45	1228	1	1	1	567.283	1132.55	2	1132.55	-0.0008	0	32.2	0.027	R	LPENLYNDR	M
1D-6,2D-67	45	sp|O14949|QCR8_HUMAN	sp	O14949	QCR8_HUMAN	Cytochrome b-c1 complex subunit 8 OS=Homo sapiens GN=UQCRQ PE=1 SV=4	242	9900	12	11	6	6	61	865	1	1	1	525.279	1048.54	2	1048.54	0.0025	1	32.11	0.033	M	GREFGNLTR	M
1D-6,2D-64,2D-65	211	sp|Q9UDW1|QCR9_HUMAN	sp	Q9UDW1	QCR9_HUMAN	Cytochrome b-c1 complex subunit 9 OS=Homo sapiens GN=UQCR10 PE=1 SV=3	31	7304	1	1	1	1	27	3075	1	1	1	621.953	1862.84	3	1862.84	-0.0048	0	30.83	0.023	R	AFDQGADAIYDHINEGK	L
1D-6,2D-65,2D-67	17	sp|P47985|UCRI_HUMAN	sp	P47985	UCRI_HUMAN	Cytochrome b-c1 complex subunit Rieske, mitochondrial OS=Homo sapiens GN=UQCRFS1 PE=1 SV=2	294	29934	12	12	5	5	21.9	580	1	1	1	506.741	1011.47	2	1011.47	0.0019	0	33.05	0.012	K	VPDFSEYR	R
1D-6,2D-65	171	sp|P00395|COX1_HUMAN	sp	P00395	COX1_HUMAN	Cytochrome c oxidase subunit 1 OS=Homo sapiens GN=MT-CO1 PE=1 SV=1	51	57060	2	2	1	1	3.3	3575	1	1	1	900.49	1798.96	2	1798.95	0.0107	0	51.02	0.00029	R	AYFTSATMIIAIPTGVK	V	Oxidation (M)
1D-6,2D-64	55	sp|P00403|COX2_HUMAN	sp	P00403	COX2_HUMAN	Cytochrome c oxidase subunit 2 OS=Homo sapiens GN=MT-CO2 PE=1 SV=1	76	25719	3	3	2	2	11.5	1018	1	1	1	553.851	1105.69	2	1105.69	0.0015	0	30.45	0.0068	R	VVLPIEAPIR	M
1D-6,2D-67	220	sp|P00414|COX3_HUMAN	sp	P00414	COX3_HUMAN	Cytochrome c oxidase subunit 3 OS=Homo sapiens GN=MT-CO3 PE=1 SV=2	33	29988	2	2	1	1	5.4	2979	1	1	1	804.896	1607.78	2	1607.77	0.0078	0	29.11	0.056	R	ESTYQGHHTPPVQK	G
1D-6,2D-61,2D-67	149	sp|P13073|COX41_HUMAN	sp	P13073	COX41_HUMAN	Cytochrome c oxidase subunit 4 isoform 1, mitochondrial OS=Homo sapiens GN=COX4I1 PE=1 SV=1	50	19621	1	1	1	1	7.1	1794	1	1	1	723.818	1445.62	2	1445.61	0.009	0	50.14	0.00016	K	SEDFSLPAYMDR	R	Oxidation (M)
1D-6,2D-62,2D-63,2D-68	181	sp|P20674|COX5A_HUMAN	sp	P20674	COX5A_HUMAN	Cytochrome c oxidase subunit 5A, mitochondrial OS=Homo sapiens GN=COX5A PE=1 SV=2	37	16923	2	2	1	1	10	2576	1	1	1	846.934	1691.85	2	1691.84	0.0098	0	36.81	0.0091	K	GINTLVTYDMVPEPK	I	Oxidation (M)
1D-6,2D-61	181	sp|P10606|COX5B_HUMAN	sp	P10606	COX5B_HUMAN	Cytochrome c oxidase subunit 5B, mitochondrial OS=Homo sapiens GN=COX5B PE=1 SV=2	48	13915	2	2	1	1	9.3	1942	1	1	1	657.877	1313.74	2	1313.73	0.0053	1	34.15	0.015	K	KGLDPYNVLAPK	G
1D-6,2D-67,2D-69	129	sp|P09669|COX6C_HUMAN	sp	P09669	COX6C_HUMAN	Cytochrome c oxidase subunit 6C OS=Homo sapiens GN=COX6C PE=1 SV=2	34	8776	1	1	1	1	10.7	167	1	1	1	425.246	848.477	2	848.476	0.0018	0	33.52	0.018	K	AGIFQSVK	-
1D-6,2D-63,2D-69	171	sp|P24310|CX7A1_HUMAN	sp	P24310	CX7A1_HUMAN	Cytochrome c oxidase subunit 7A1, mitochondrial OS=Homo sapiens GN=COX7A1 PE=1 SV=2	35	9169	1	1	1	1	16.5	3069	1	1	1	804.423	1606.83	2	1606.82	0.007	0	35.44	0.013	K	LFQEDNDIPLYLK	G
1D-6,2D-66	45	sp|P14406|CX7A2_HUMAN	sp	P14406	CX7A2_HUMAN	Cytochrome c oxidase subunit 7A2, mitochondrial OS=Homo sapiens GN=COX7A2 PE=1 SV=1	241	9390	10	10	3	3	56.6	4125	1	1	1	835.113	2502.32	3	2502.31	0.0092	0	31.4	0.023	R	ATMILTVGGTAYAIYELAVASFPK	K	Oxidation (M)
1D-6,2D-69	200	sp|O14548|COX7R_HUMAN	sp	O14548	COX7R_HUMAN	Cytochrome c oxidase subunit 7A-related protein, mitochondrial OS=Homo sapiens GN=COX7A2L PE=1 SV=2	33	12664	1	1	1	1	11.4	1734	1	1	1	710.336	1418.66	2	1418.66	0.0001	0	32.53	0.019	K	LTSDSTVYDYAGK	N
1D-6,2D-65,2D-68	225	sp|P24311|COX7B_HUMAN	sp	P24311	COX7B_HUMAN	Cytochrome c oxidase subunit 7B, mitochondrial OS=Homo sapiens GN=COX7B PE=1 SV=2	32	9212	1	1	1	1	8.8	186	1	1	1	430.202	858.389	2	858.387	0.0023	0	31.78	0.014	R	TPDFHDK	Y
1D-6,2D-67	116	sp|P15954|COX7C_HUMAN	sp	P15954	COX7C_HUMAN	Cytochrome c oxidase subunit 7C, mitochondrial OS=Homo sapiens GN=COX7C PE=1 SV=1	89	7298	2	2	1	1	27	4055	1	1	1	998.005	1993.99	2	1993.98	0.0152	0	89.39	4.9e-08	K	MCLYFGSAFATPFLVVR	H	Oxidation (M)
1D-6,2D-67,2D-69	230	sp|P10176|COX8A_HUMAN	sp	P10176	COX8A_HUMAN	Cytochrome c oxidase subunit 8A, mitochondrial OS=Homo sapiens GN=COX8A PE=1 SV=2	31	7631	1	1	1	1	13	544	1	1	1	489.276	976.538	2	976.534	0.0035	0	30.84	0.039	K	IHSLPPEGK	L
1D-6,2D-63,2D-67	32	sp|P11511|CP19A_HUMAN	sp	P11511	CP19A_HUMAN	Cytochrome P450 19A1 OS=Homo sapiens GN=CYP19A1 PE=1 SV=3	162	58358	5	5	5	5	11.7	1331	1	1	1	592.352	1182.69	2	1182.69	0.0037	0	32.03	0.015	R	IPLDESAIVVK	I
1D-5	132	sp|P21399|ACOC_HUMAN	sp	P21399	ACOC_HUMAN	Cytoplasmic aconitate hydratase OS=Homo sapiens GN=ACO1 PE=1 SV=3	72	98850	3	3	2	2	3.7	2612	1	1	1	735.939	1469.86	2	1469.86	0.0029	0	39.78	0.0024	R	YQQAGLPLIVLAGK	E
1D-5,2D-54	201	sp|Q8NCM8|DYHC2_HUMAN	sp	Q8NCM8	DYHC2_HUMAN	Cytoplasmic dynein 2 heavy chain 1 OS=Homo sapiens GN=DYNC2H1 PE=1 SV=4	29	495790	1	1	1	1	0.3	2966	2	0	1	804.423	1606.83	2	1606.87	-0.0347	2	31.72	0.031	R	EMKRFIGIPNQFK	G
1D-5,2D-55,2D-57	126	sp|Q07065|CKAP4_HUMAN	sp	Q07065	CKAP4_HUMAN	Cytoskeleton-associated protein 4 OS=Homo sapiens GN=CKAP4 PE=1 SV=2	74	66097	1	1	1	1	3.2	3159	1	1	1	952.963	1903.91	2	1903.91	-0.0005	0	74.13	1.6e-06	R	LEGLGSSEADQDGLASTVR	S
1D-5,2D-53,2D-57	57	sp|P28838|AMPL_HUMAN	sp	P28838	AMPL_HUMAN	Cytosol aminopeptidase OS=Homo sapiens GN=LAP3 PE=1 SV=3	134	56530	6	6	3	3	6.9	2004	1	1	1	659.818	1317.62	2	1317.62	0.0052	0	45.68	0.00099	K	TIQVDNTDAEGR	L
1D-5,2D-51,2D-57	109	sp|O00154|BACH_HUMAN	sp	O00154	BACH_HUMAN	Cytosolic acyl coenzyme A thioester hydrolase OS=Homo sapiens GN=ACOT7 PE=1 SV=3	118	42454	6	6	3	3	11.6	1769	1	1	1	630.837	1259.66	2	1259.65	0.0049	0	41.23	0.0044	K	LMDEVAGIVAAR	H	Oxidation (M)
1D-5,2D-54,2D-59	127	sp|Q13268|DHRS2_HUMAN	sp	Q13268	DHRS2_HUMAN	Dehydrogenase/reductase SDR family member 2 OS=Homo sapiens GN=DHRS2 PE=1 SV=3	70	27764	2	2	1	1	6.6	2276	1	1	1	803.455	1604.9	2	1604.89	0.0074	0	55.72	8.3e-05	R	VAVVTGSTSGIGFAIAR	R
1D-7	55	sp|Q13011|ECH1_HUMAN	sp	Q13011	ECH1_HUMAN	Delta(3,5)-Delta(2,4)-dienoyl-CoA isomerase, mitochondrial OS=Homo sapiens GN=ECH1 PE=1 SV=2	89	36136	3	2	2	2	9.5	2175	1	1	1	771.911	1541.81	2	1541.8	0.0027	0	52.66	0.00026	K	EVDVGLAADVGTLQR	L
1D-7,2D-75,2D-77	79	sp|P30038|AL4A1_HUMAN	sp	P30038	AL4A1_HUMAN	Delta-1-pyrroline-5-carboxylate dehydrogenase, mitochondrial OS=Homo sapiens GN=ALDH4A1 PE=1 SV=3	44	62137	1	1	1	1	2.3	1864	1	1	1	660.345	1318.67	2	1318.67	0.0018	0	43.5	0.0024	R	SADVESVVSGTLR	S
1D-7,2D-75,2D-78	171	sp|P54886|P5CS_HUMAN	sp	P54886	P5CS_HUMAN	Delta-1-pyrroline-5-carboxylate synthase OS=Homo sapiens GN=ALDH18A1 PE=1 SV=2	36	87989	1	1	1	1	1.5	1376	1	1	1	592.85	1183.69	2	1183.68	0.0042	0	35.85	0.0082	R	GPVGLEGLLTTK	W
1D-7,2D-73,2D-76	100	sp|Q9BUN8|DERL1_HUMAN	sp	Q9BUN8	DERL1_HUMAN	Derlin-1 OS=Homo sapiens GN=DERL1 PE=1 SV=1	32	28896	1	1	1	1	4.4	2065	1	1	1	693.366	1384.72	2	1384.71	0.0041	0	31.99	0.031	R	NFLSTPQFLYR	W
1D-5,2D-51,2D-54	102	sp|P09622|DLDH_HUMAN	sp	P09622	DLDH_HUMAN	Dihydrolipoyl dehydrogenase, mitochondrial OS=Homo sapiens GN=DLD PE=1 SV=2	101	54713	4	4	2	2	6.5	2195	1	1	1	784.423	1566.83	2	1566.83	0.0059	0	67.77	7.2e-06	K	NLGLEELGIELDPR	G
1D-5,2D-51,2D-57	185	sp|P10515|ODP2_HUMAN	sp	P10515	ODP2_HUMAN	Dihydrolipoyllysine-residue acetyltransferase component of pyruvate dehydrogenase complex, mitochondrial OS=Homo sapiens GN=DLAT PE=1 SV=3	36	69466	1	1	1	1	2.3	2687	1	1	1	758.918	1515.82	2	1515.81	0.0072	0	35.61	0.013	K	GVETIANDVVSLATK	A
1D-5,2D-56	73	sp|P36957|ODO2_HUMAN	sp	P36957	ODO2_HUMAN	Dihydrolipoyllysine-residue succinyltransferase component of 2-oxoglutarate dehydrogenase complex, mitochondrial OS=Homo sapiens GN=DLST PE=1 SV=4	49	49067	2	2	1	1	2.6	2207	1	1	1	712.829	1423.64	2	1423.64	0.0041	0	49.22	0.00035	R	NVEAMNFADIER	T	Oxidation (M)
1D-5,2D-53	144	sp|Q9BPU6|DPYL5_HUMAN	sp	Q9BPU6	DPYL5_HUMAN	Dihydropyrimidinase-related protein 5 OS=Homo sapiens GN=DPYSL5 PE=1 SV=1	30	61952	3	3	1	1	1.4	758	2	0	1	508.829	1015.64	2	1015.62	0.0252	1	28.86	0.016	K	LLNLYPRK	G
1D-5,2D-57	220	sp|Q9BPU6|DPYL5_HUMAN	sp	Q9BPU6	DPYL5_HUMAN	Dihydropyrimidinase-related protein 5 OS=Homo sapiens GN=DPYSL5 PE=1 SV=1	29	61952	1	1	1	1	1.4	463	2	0	1	508.831	1015.65	2	1015.62	0.029	1	29.46	0.011	K	LLNLYPRK	G
1D-5,2D-59	158	sp|P53634|CATC_HUMAN	sp	P53634	CATC_HUMAN	Dipeptidyl peptidase 1 OS=Homo sapiens GN=CTSC PE=1 SV=2	30	52619	1	1	1	1	2.6	2102	1	1	1	669.869	1337.72	2	1337.72	0.0038	0	29.86	0.04	R	NVHGINFVSPVR	N
1D-5,2D-56,2D-57	28	sp|P27487|DPP4_HUMAN	sp	P27487	DPP4_HUMAN	Dipeptidyl peptidase 4 OS=Homo sapiens GN=DPP4 PE=1 SV=2	397	88907	13	13	8	8	14.6	317	1	1	1	484.26	966.505	2	966.502	0.0025	0	29.28	0.044	K	IQLSDYTK	V
1D-5,2D-59,2D-60	236	sp|Q14689|DIP2A_HUMAN	sp	Q14689	DIP2A_HUMAN	Disco-interacting protein 2 homolog A OS=Homo sapiens GN=DIP2A PE=1 SV=2	30	172371	1	1	1	1	0.5	596	1	1	1	495.779	989.544	2	989.515	0.0288	2	30.12	0.054	R	KMPMPSKR	R	Oxidation (M)
1D-5,2D-51,2D-57	120	sp|Q9P265|DIP2B_HUMAN	sp	Q9P265	DIP2B_HUMAN	Disco-interacting protein 2 homolog B OS=Homo sapiens GN=DIP2B PE=1 SV=3	28	173606	1	0	1	0	0.5	302	1	1	1	452.75	903.486	2	903.456	0.0305	0	28.44	0.081	K	MALPMPTK	R	Oxidation (M)
1D-8,2D-83,2D-87	161	sp|P49917|DNLI4_HUMAN	sp	P49917	DNLI4_HUMAN	DNA ligase 4 OS=Homo sapiens GN=LIG4 PE=1 SV=2	30	105044	1	1	1	1	0.8	284	2	0	1	438.764	875.512	2	875.515	-0.0026	1	30.43	0.031	R	MIIKDLK	L	Oxidation (M)
1D-8,2D-81,2D-82	145	sp|Q92889|XPF_HUMAN	sp	Q92889	XPF_HUMAN	DNA repair endonuclease XPF OS=Homo sapiens GN=ERCC4 PE=1 SV=3	30	105333	1	1	1	1	1.5	2569	2	0	1	836.929	1671.84	2	1671.9	-0.0547	2	29.72	0.053	K	LIREKASMVVPEER	E	Oxidation (M)
1D-8,2D-83,2D-84	215	sp|P49736|MCM2_HUMAN	sp	P49736	MCM2_HUMAN	DNA replication licensing factor MCM2 OS=Homo sapiens GN=MCM2 PE=1 SV=4	31	102516	1	1	1	1	1	1213	1	1	1	568.265	1134.52	2	1134.55	-0.0331	1	30.68	0.026	R	MNKFSHDLK	R	Oxidation (M)
1D-8,2D-87,2D-88	233	sp|P11388|TOP2A_HUMAN	sp	P11388	TOP2A_HUMAN	DNA topoisomerase 2-alpha OS=Homo sapiens GN=TOP2A PE=1 SV=3	28	175017	1	0	1	0	0.8	2332	2	0	1	695.856	1389.7	2	1389.75	-0.0572	2	28.41	0.073	R	ITIEMKAEAEKK	N
1D-5,2D-51,2D-52,2D-53	49	sp|P39656|OST48_HUMAN	sp	P39656	OST48_HUMAN	Dolichyl-diphosphooligosaccharide--protein glycosyltransferase 48 kDa subunit OS=Homo sapiens GN=DDOST PE=1 SV=4	231	50940	9	9	5	5	15.6	885	1	1	1	585.357	1168.7	2	1168.69	0.0075	0	68.34	3e-06	K	NTLLIAGLQAR	N
1D-5,2D-54	18	sp|P04843|RPN1_HUMAN	sp	P04843	RPN1_HUMAN	Dolichyl-diphosphooligosaccharide--protein glycosyltransferase subunit 1 OS=Homo sapiens GN=RPN1 PE=1 SV=1	256	68641	12	11	7	7	15.2	485	1	1	1	490.793	979.571	2	979.57	0.0012	0	32.47	0.013	K	LPVALDPGAK	I
1D-5,2D-56	21	sp|P04844|RPN2_HUMAN	sp	P04844	RPN2_HUMAN	Dolichyl-diphosphooligosaccharide--protein glycosyltransferase subunit 2 OS=Homo sapiens GN=RPN2 PE=1 SV=3	478	69355	16	16	9	9	26.1	2999	1	1	1	920.535	1839.05	2	1839.05	0.0081	0	71.16	1.5e-06	R	LQVTNVLSQPLTQATVK	L
1D-5,2D-52,2D-53	93	sp|P61803|DAD1_HUMAN	sp	P61803	DAD1_HUMAN	Dolichyl-diphosphooligosaccharide--protein glycosyltransferase subunit DAD1 OS=Homo sapiens GN=DAD1 PE=1 SV=3	36	12660	3	2	1	1	8.8	762	1	1	1	523.797	1045.58	2	1045.58	0.0031	0	33.36	0.024	M	SASVVSVISR	F	Acetyl (Protein N-term)
1D-5,2D-58,2D-59	128	sp|P46977|STT3A_HUMAN	sp	P46977	STT3A_HUMAN	Dolichyl-diphosphooligosaccharide--protein glycosyltransferase subunit STT3A OS=Homo sapiens GN=STT3A PE=1 SV=2	70	81104	3	3	2	2	2.8	1364	1	1	1	652.334	1302.65	2	1302.65	0.0043	0	32.39	0.029	R	FYSLLDPSYAK	N
1D-4,2D-42,2D-44	206	sp|O95793|STAU1_HUMAN	sp	O95793	STAU1_HUMAN	Double-stranded RNA-binding protein Staufen homolog 1 OS=Homo sapiens GN=STAU1 PE=1 SV=2	30	63428	1	1	1	1	2.1	2080	1	1	1	682.343	1362.67	2	1362.74	-0.0674	0	30.47	0.039	K	SEISQVFEIALK	R
1D-4,2D-45,2D-47	187	sp|Q16643|DREB_HUMAN	sp	Q16643	DREB_HUMAN	Drebrin OS=Homo sapiens GN=DBN1 PE=1 SV=4	34	71842	1	1	1	1	1.2	240	2	0	1	440.728	879.442	2	879.401	0.0417	0	34	0.016	K	TDAAVEMK	R	Oxidation (M)
1D-6,2D-65,2D-67	122	sp|Q05193|DYN1_HUMAN	sp	Q05193	DYN1_HUMAN	Dynamin-1 OS=Homo sapiens GN=DNM1 PE=1 SV=2	37	97746	1	1	1	1	0.9	568	1	1	1	480.288	958.561	2	958.527	0.0345	1	37.03	0.0084	K	TVRDLMPK	T
1D-6,2D-67,2D-68	235	sp|Q6XZF7|DNMBP_HUMAN	sp	Q6XZF7	DNMBP_HUMAN	Dynamin-binding protein OS=Homo sapiens GN=DNMBP PE=1 SV=1	28	178719	1	1	1	1	0.4	172	1	1	1	427.219	852.424	2	852.449	-0.0249	0	28.37	0.045	R	TGIFPYR	F
1D-7,2D-77	194	sp|O75150|BRE1B_HUMAN	sp	O75150	BRE1B_HUMAN	E3 ubiquitin-protein ligase BRE1B OS=Homo sapiens GN=RNF40 PE=1 SV=4	34	114322	1	1	1	1	1	998	2	0	1	600.343	1198.67	2	1198.71	-0.0435	2	33.8	0.018	R	TNERLKVALR	S
1D-7	142	sp|Q6PCD5|RFWD3_HUMAN	sp	Q6PCD5	RFWD3_HUMAN	E3 ubiquitin-protein ligase RFWD3 OS=Homo sapiens GN=RFWD3 PE=1 SV=3	32	86408	2	2	1	1	1.3	1690	2	0	1	610.855	1219.7	2	1219.66	0.0366	1	30.32	0.027	K	SSLLKEQMLR	K	Oxidation (M)
1D-7,2D-72,2D-76	198	sp|Q86TM6|SYVN1_HUMAN	sp	Q86TM6	SYVN1_HUMAN	E3 ubiquitin-protein ligase synoviolin OS=Homo sapiens GN=SYVN1 PE=1 SV=2	33	68154	1	1	1	1	1.1	194	1	1	1	433.749	865.484	2	865.481	0.0026	0	32.58	0.016	K	VFFGQLR	A
1D-7,2D-73,2D-78	167	sp|O95071|UBR5_HUMAN	sp	O95071	UBR5_HUMAN	E3 ubiquitin-protein ligase UBR5 OS=Homo sapiens GN=UBR5 PE=1 SV=2	29	312352	1	1	1	1	0.4	1087	2	0	1	543.333	1084.65	2	1084.66	-0.0092	0	29.24	0.038	K	IVLLSANSIR	A
1D-9	207	sp|P22413|ENPP1_HUMAN	sp	P22413	ENPP1_HUMAN	Ectonucleotide pyrophosphatase/phosphodiesterase family member 1 OS=Homo sapiens GN=ENPP1 PE=1 SV=2	29	107024	2	2	1	1	1.7	3690	1	1	1	636.33	1905.97	3	1905.96	0.0094	0	31.92	0.028	R	ITDVEHITGLSFYQQR	K
1D-6	164	sp|P13804|ETFA_HUMAN	sp	P13804	ETFA_HUMAN	Electron transfer flavoprotein subunit alpha, mitochondrial OS=Homo sapiens GN=ETFA PE=1 SV=1	36	35400	1	1	1	1	3.9	2206	1	1	1	691.421	1380.83	2	1380.82	0.0051	0	36.23	0.0035	K	LEVAPISDIIAIK	S
1D-6,2D-61,2D-63	189	sp|P38117|ETFB_HUMAN	sp	P38117	ETFB_HUMAN	Electron transfer flavoprotein subunit beta OS=Homo sapiens GN=ETFB PE=1 SV=3	35	28054	2	2	1	1	4.7	1898	1	1	1	432.607	1294.8	3	1294.8	0.0016	1	37.55	0.0015	R	LKLPAVVTADLR	L
1D-6,2D-62,2D-66	173	sp|P26641|EF1G_HUMAN	sp	P26641	EF1G_HUMAN	Elongation factor 1-gamma OS=Homo sapiens GN=EEF1G PE=1 SV=3	39	50429	1	1	1	1	2.3	1148	1	1	1	559.848	1117.68	2	1117.67	0.0064	0	38.64	0.002	R	ILGLLDAYLK	T
1D-6,2D-67,2D-68	217	sp|P26641|EF1G_HUMAN	sp	P26641	EF1G_HUMAN	Elongation factor 1-gamma OS=Homo sapiens GN=EEF1G PE=1 SV=3	30	50429	1	1	1	1	2.3	1139	1	1	1	559.846	1117.68	2	1117.67	0.0024	0	30.05	0.018	R	ILGLLDAYLK	T
1D-5,2D-52,2D-53	105	sp|P17813|EGLN_HUMAN	sp	P17813	EGLN_HUMAN	Endoglin OS=Homo sapiens GN=ENG PE=1 SV=2	42	71559	2	2	1	1	2.7	3773	1	1	1	948.018	1894.02	2	1894.02	0.0055	0	40.29	0.0032	R	GPITSAAELNDPQSILLR	L
1D-5,2D-51,2D-52	173	sp|Q9NZ08|ERAP1_HUMAN	sp	Q9NZ08	ERAP1_HUMAN	Endoplasmic reticulum aminopeptidase 1 OS=Homo sapiens GN=ERAP1 PE=1 SV=3	41	107736	2	2	1	1	1.4	2776	1	1	1	758.433	1514.85	2	1514.85	0.0052	0	29.1	0.042	K	TQEFPQILTLIGR	N
1D-5,2D-54,2D-55	183	sp|Q6P179|ERAP2_HUMAN	sp	Q6P179	ERAP2_HUMAN	Endoplasmic reticulum aminopeptidase 2 OS=Homo sapiens GN=ERAP2 PE=1 SV=2	33	111075	1	1	1	1	1.4	2526	1	1	1	730.896	1459.78	2	1459.77	0.0104	0	32.51	0.028	R	ILAVTDFEPTQAR	M
1D-5,2D-58	6	sp|P14625|ENPL_HUMAN	sp	P14625	ENPL_HUMAN	Endoplasmin OS=Homo sapiens GN=HSP90B1 PE=1 SV=1	628	92696	24	23	13	13	19.6	489	1	1	1	491.747	981.478	2	981.477	0.0017	0	32.08	0.02	K	SGTSEFLNK	M
1D-7	116	sp|Q96AP7|ESAM_HUMAN	sp	Q96AP7	ESAM_HUMAN	Endothelial cell-selective adhesion molecule OS=Homo sapiens GN=ESAM PE=1 SV=1	57	41436	1	1	1	1	4.4	3681	1	1	1	926.479	1850.94	2	1850.94	0.0063	1	56.7	9.3e-05	K	ALEEPANDIKEDAIAPR	T
1D-7	152	sp|P42126|ECI1_HUMAN	sp	P42126	ECI1_HUMAN	Enoyl-CoA delta isomerase 1, mitochondrial OS=Homo sapiens GN=ECI1 PE=1 SV=1	42	33080	2	2	1	1	4.3	2549	1	1	1	735.37	1468.72	2	1468.72	0.005	0	33.25	0.02	R	DADVQNFVSFISK	D
1D-7,2D-72,2D-74	75	sp|P00533|EGFR_HUMAN	sp	P00533	EGFR_HUMAN	Epidermal growth factor receptor OS=Homo sapiens GN=EGFR PE=1 SV=2	147	137612	8	8	3	3	3.3	977	1	1	1	599.829	1197.64	2	1197.64	0.0033	0	31.86	0.027	K	VLGSGAFGTVYK	G
1D-7,2D-73,2D-74	223	sp|P24390|ERD21_HUMAN	sp	P24390	ERD21_HUMAN	ER lumen protein retaining receptor 1 OS=Homo sapiens GN=KDELR1 PE=1 SV=1	30	24754	2	1	1	1	9	4164	1	1	1	710.03	2127.07	3	2127.06	0.0042	0	29.58	0.045	K	TGEAETITSHYLFALGVYR	T
1D-7,2D-78,2D-79	68	sp|P27105|STOM_HUMAN	sp	P27105	STOM_HUMAN	Erythrocyte band 7 integral membrane protein OS=Homo sapiens GN=STOM PE=1 SV=3	65	31882	1	1	1	1	6.6	2792	1	1	1	965.505	1929	2	1928.99	0.0041	0	65.36	1.2e-05	R	VQNATLAVANITNADSATR	L
1D-7,2D-78,2D-79	44	sp|P16452|EPB42_HUMAN	sp	P16452	EPB42_HUMAN	Erythrocyte membrane protein band 4.2 OS=Homo sapiens GN=EPB42 PE=1 SV=3	119	77816	2	2	2	2	3.9	1645	1	1	1	665.356	1328.7	2	1328.69	0.0043	0	35.49	0.014	K	VALTAQTGEQPSK	I
1D-8	224	sp|P30042|ES1_HUMAN	sp	P30042	ES1_HUMAN	ES1 protein homolog, mitochondrial OS=Homo sapiens GN=C21orf33 PE=1 SV=3	29	28495	1	1	1	1	3.7	1300	1	1	1	577.298	1152.58	2	1152.58	0.0033	0	29.49	0.049	K	EVVEAHVDQK	N
1D-8	103	sp|P37059|DHB2_HUMAN	sp	P37059	DHB2_HUMAN	Estradiol 17-beta-dehydrogenase 2 OS=Homo sapiens GN=HSD17B2 PE=1 SV=1	99	43441	2	2	1	1	3.1	1468	1	1	1	666.902	1331.79	2	1331.78	0.0084	0	98.55	2.5e-09	R	NFLLLINSLASK	D
1D-8,2D-86,2D-87	162	sp|P60842|IF4A1_HUMAN	sp	P60842	IF4A1_HUMAN	Eukaryotic initiation factor 4A-I OS=Homo sapiens GN=EIF4A1 PE=1 SV=1	54	46353	1	1	1	1	4.2	3845	1	1	1	952.544	1903.07	2	1903.07	0.007	0	54.26	9.5e-05	K	TATFAISILQQIELDLK	A
1D-8,2D-84,2D-85	234	sp|P05198|IF2A_HUMAN	sp	P05198	IF2A_HUMAN	Eukaryotic translation initiation factor 2 subunit 1 OS=Homo sapiens GN=EIF2S1 PE=1 SV=3	28	36374	1	1	1	1	2.5	349	2	0	1	456.798	911.582	2	911.555	0.027	1	28.4	0.018	R	RLTPQAVK	I
1D-8,2D-83,2D-84	173	sp|P43003|EAA1_HUMAN	sp	P43003	EAA1_HUMAN	Excitatory amino acid transporter 1 OS=Homo sapiens GN=SLC1A3 PE=1 SV=1	37	59705	1	1	1	1	2.2	1919	1	1	1	652.866	1303.72	2	1303.71	0.0047	0	37.03	0.0085	R	VTAADAFLDLIR	N
1D-8,2D-83,2D-85	154	sp|Q9BSJ8|ESYT1_HUMAN	sp	Q9BSJ8	ESYT1_HUMAN	Extended synaptotagmin-1 OS=Homo sapiens GN=ESYT1 PE=1 SV=1	35	123293	2	2	1	1	1.2	1966	1	1	1	655.416	1308.82	2	1308.81	0.0038	0	33.96	0.0031	R	ALTLGALTLPLAR	L
1D-8,2D-86,2D-88	213	sp|O95677|EYA4_HUMAN	sp	O95677	EYA4_HUMAN	Eyes absent homolog 4 OS=Homo sapiens GN=EYA4 PE=1 SV=2	29	69918	1	0	1	0	1.3	252	1	1	1	438.753	875.491	2	875.508	-0.0166	0	28.65	0.066	K	SLSIISTR	S
1D-8,2D-84,2D-87	154	sp|P15311|EZRI_HUMAN	sp	P15311	EZRI_HUMAN	Ezrin OS=Homo sapiens GN=EZR PE=1 SV=4	46	69484	2	2	1	1	2.7	3842	1	1	1	981.986	1961.96	2	1961.94	0.014	0	43.67	0.0019	K	IAQDLEMYGINYFEIK	N	Oxidation (M)
1D-4,2D-41,2D-43	238	sp|P47755|CAZA2_HUMAN	sp	P47755	CAZA2_HUMAN	F-actin-capping protein subunit alpha-2 OS=Homo sapiens GN=CAPZA2 PE=1 SV=3	28	33157	1	1	1	1	3.5	1460	1	1	1	599.354	1196.69	2	1196.69	0.0052	0	28.33	0.039	R	LLLNNDNLLR	E
1D-4,2D-41,2D-43	172	sp|Q8WVX9|FACR1_HUMAN	sp	Q8WVX9	FACR1_HUMAN	Fatty acyl-CoA reductase 1 OS=Homo sapiens GN=FAR1 PE=1 SV=1	29	59661	1	0	1	0	1.6	623	1	1	1	496.756	991.497	2	991.545	-0.0476	1	28.98	0.065	K	KTFNIDVR	Q
1D-4,2D-45,2D-47	213	sp|Q9Y2L6|FRM4B_HUMAN	sp	Q9Y2L6	FRM4B_HUMAN	FERM domain-containing protein 4B OS=Homo sapiens GN=FRMD4B PE=1 SV=4	31	118829	1	1	1	1	0.6	99	3	0	1	425.248	848.482	2	848.491	-0.0084	1	30.69	0.032	R	KLFQWK	Q
1D-3,2D-32	76	sp|P02794|FRIH_HUMAN	sp	P02794	FRIH_HUMAN	Ferritin heavy chain OS=Homo sapiens GN=FTH1 PE=1 SV=2	89	21383	3	3	2	2	10.9	1635	1	1	1	647.862	1293.71	2	1293.7	0.006	0	57.9	6.5e-05	K	NVNQSLLELHK	L
1D-3,2D-35	59	sp|P02792|FRIL_HUMAN	sp	P02792	FRIL_HUMAN	Ferritin light chain OS=Homo sapiens GN=FTL PE=1 SV=2	82	20064	3	3	2	2	9.1	2287	1	1	1	531.303	1590.89	3	1590.88	0.0045	0	31.83	0.019	K	LNQALLDLHALGSAR	T
1D-5,2D-52	136	sp|Q5CZC0|FSIP2_HUMAN	sp	Q5CZC0	FSIP2_HUMAN	Fibrous sheath-interacting protein 2 OS=Homo sapiens GN=FSIP2 PE=1 SV=4	32	785878	2	2	1	1	0.1	298	3	0	1	438.764	875.514	2	875.515	-0.0014	1	31.21	0.026	K	IMEKVIK	I	Oxidation (M)
1D-5,2D-52,2D-57	103	sp|P21333|FLNA_HUMAN	sp	P21333	FLNA_HUMAN	Filamin-A OS=Homo sapiens GN=FLNA PE=1 SV=4	45	283301	2	2	1	1	0.4	953	1	1	1	554.811	1107.61	2	1107.6	0.0038	0	47.9	0.00063	R	ALTQTGGPHVK	A
1D-5,2D-52,2D-53	50	sp|O75369|FLNB_HUMAN	sp	O75369	FLNB_HUMAN	Filamin-B OS=Homo sapiens GN=FLNB PE=1 SV=2	207	280157	8	8	4	4	2.1	2235	1	1	1	701.374	1400.73	2	1400.73	0.0071	0	60.1	5e-05	R	IGNLQTDLSDGLR	L
1D-1	122	sp|Q14254|FLOT2_HUMAN	sp	Q14254	FLOT2_HUMAN	Flotillin-2 OS=Homo sapiens GN=FLOT2 PE=1 SV=2	53	47434	1	1	1	1	3.3	2586	1	1	1	742.433	1482.85	2	1482.85	0.0045	0	52.57	0.00015	K	MALVLEALPQIAAK	I	Oxidation (M)
1D-1	197	sp|Q68DA7|FMN1_HUMAN	sp	Q68DA7	FMN1_HUMAN	Formin-1 OS=Homo sapiens GN=FMN1 PE=1 SV=3	33	158792	1	1	1	1	0.6	99	2	0	1	425.248	848.482	2	848.487	-0.0044	0	33.05	0.018	R	AGLPLGGHK	S
1D-1,2D-5,2D-7	155	sp|P04075|ALDOA_HUMAN	sp	P04075	ALDOA_HUMAN	Fructose-bisphosphate aldolase A OS=Homo sapiens GN=ALDOA PE=1 SV=2	46	39851	3	3	1	1	3.8	1466	1	1	1	666.86	1331.71	2	1331.69	0.0124	0	43.71	0.0022	K	GILAADESTGSIAK	R
1D-4,2D-45	202	sp|Q9H9S5|FKRP_HUMAN	sp	Q9H9S5	FKRP_HUMAN	Fukutin-related protein OS=Homo sapiens GN=FKRP PE=1 SV=1	37	54990	2	2	1	1	2.2	1377	2	0	1	588.837	1175.66	2	1175.61	0.0518	1	37.23	0.0078	R	MVEALRAGSAR	L	Oxidation (M)
1D-4,2D-47	56	sp|P07954|FUMH_HUMAN	sp	P07954	FUMH_HUMAN	Fumarate hydratase, mitochondrial OS=Homo sapiens GN=FH PE=1 SV=3	205	54773	5	4	4	3	12.7	2761	1	1	1	882.473	1762.93	2	1762.92	0.0103	0	69.02	5.4e-06	R	IYELAAGGTAVGTGLNTR	I
1D-4,2D-45	142	sp|Q96M96|FGD4_HUMAN	sp	Q96M96	FGD4_HUMAN	FYVE, RhoGEF and PH domain-containing protein 4 OS=Homo sapiens GN=FGD4 PE=1 SV=2	31	87598	1	1	1	1	0.9	152	2	0	1	422.731	843.447	2	843.445	0.0023	0	30.76	0.043	K	LLEEANR	G
1D-4,2D-45,2D-46	152	sp|Q6ZV73|FGD6_HUMAN	sp	Q6ZV73	FGD6_HUMAN	FYVE, RhoGEF and PH domain-containing protein 6 OS=Homo sapiens GN=FGD6 PE=1 SV=2	31	162596	1	1	1	1	0.5	363	1	1	1	442.713	883.411	2	883.375	0.0361	0	30.8	0.017	K	CDLYGEK	A
1D-3,2D-32,2D-33	138	sp|Q8WTQ7|GRK7_HUMAN	sp	Q8WTQ7	GRK7_HUMAN	G protein-coupled receptor kinase 7 OS=Homo sapiens GN=GRK7 PE=1 SV=1	31	62970	1	1	1	1	3.4	3222	2	0	1	689.003	2063.99	3	2064.03	-0.045	0	31.22	0.027	M	VDMGALDNLIANTAYLQAR	K	Oxidation (M)
1D-3,2D-31,2D-36	198	sp|Q08380|LG3BP_HUMAN	sp	Q08380	LG3BP_HUMAN	Galectin-3-binding protein OS=Homo sapiens GN=LGALS3BP PE=1 SV=1	29	66202	1	1	1	1	2.2	2099	1	1	1	678.396	1354.78	2	1354.77	0.0059	0	29.39	0.034	R	SDLAVPSELALLK	A
1D-3	226	sp|P36269|GGT5_HUMAN	sp	P36269	GGT5_HUMAN	Gamma-glutamyltransferase 5 OS=Homo sapiens GN=GGT5 PE=1 SV=2	32	62736	1	1	1	1	2	2035	1	1	1	671.394	1340.77	2	1340.77	0.0077	0	31.76	0.019	R	DLLGETLAQLIR	Q
1D-3	144	sp|P06396|GELS_HUMAN	sp	P06396	GELS_HUMAN	Gelsolin OS=Homo sapiens GN=GSN PE=1 SV=1	64	86043	2	2	1	1	1.7	2038	1	1	1	660.354	1318.69	2	1318.69	0.005	0	63.64	2.2e-05	K	AGALNSNDAFVLK	T
1D-5,2D-52,2D-56	157	sp|P06744|G6PI_HUMAN	sp	P06744	G6PI_HUMAN	Glucose-6-phosphate isomerase OS=Homo sapiens GN=GPI PE=1 SV=4	34	63335	2	2	1	1	3	3633	1	1	1	916.514	1831.01	2	1831.01	0.004	0	28.67	0.04	K	TLAQLNPESSLFIIASK	T
1D-5,2D-52,2D-58	71	sp|P14314|GLU2B_HUMAN	sp	P14314	GLU2B_HUMAN	Glucosidase 2 subunit beta OS=Homo sapiens GN=PRKCSH PE=1 SV=2	174	60357	14	13	4	4	10	1661	1	1	1	618.303	1234.59	2	1234.59	0.0047	0	40.36	0.0037	K	SLEDQVEMLR	T	Oxidation (M)
1D-5,2D-54,2D-59	169	sp|P00367|DHE3_HUMAN	sp	P00367	DHE3_HUMAN	Glutamate dehydrogenase 1, mitochondrial OS=Homo sapiens GN=GLUD1 PE=1 SV=2	29	61701	2	1	1	1	1.4	496	1	1	1	482.268	962.522	2	962.519	0.0035	0	28.74	0.061	K	YNLGLDLR	T
1D-5,2D-53	151	sp|P00390|GSHR_HUMAN	sp	P00390	GSHR_HUMAN	Glutathione reductase, mitochondrial OS=Homo sapiens GN=GSR PE=1 SV=2	42	56791	2	2	1	1	2.3	1243	1	1	1	576.861	1151.71	2	1151.7	0.0038	0	41.71	0.0007	K	ALLTPVAIAAGR	K
1D-6	104	sp|Q9Y2Q3|GSTK1_HUMAN	sp	Q9Y2Q3	GSTK1_HUMAN	Glutathione S-transferase kappa 1 OS=Homo sapiens GN=GSTK1 PE=1 SV=3	88	25594	2	2	2	2	13.3	3296	1	1	1	864.939	1727.86	2	1727.86	0.0063	0	55.46	0.00013	R	NEDITEPQSILAAAEK	A
1D-6,2D-63	91	sp|P04406|G3P_HUMAN	sp	P04406	G3P_HUMAN	Glyceraldehyde-3-phosphate dehydrogenase OS=Homo sapiens GN=GAPDH PE=1 SV=3	98	36201	4	4	2	2	8.4	3089	1	1	1	807.456	1612.9	2	1612.89	0.0034	0	37.29	0.0066	K	LVINGNPITIFQER	D
1D-6,2D-65,2D-68	111	sp|P43304|GPDM_HUMAN	sp	P43304	GPDM_HUMAN	Glycerol-3-phosphate dehydrogenase, mitochondrial OS=Homo sapiens GN=GPD2 PE=1 SV=3	89	81315	4	4	1	1	2.1	2413	1	1	1	821.454	1640.89	2	1640.89	0.0049	0	89.01	4.8e-08	R	LAFLNVQAAEEALPR	I
1D-7,2D-74,2D-78	137	sp|Q9UBQ7|GRHPR_HUMAN	sp	Q9UBQ7	GRHPR_HUMAN	Glyoxylate reductase/hydroxypyruvate reductase OS=Homo sapiens GN=GRHPR PE=1 SV=1	69	36045	2	2	1	1	5.2	3612	1	1	1	896.941	1791.87	2	1791.86	0.0039	0	69	5.5e-06	R	GDVVNQDDLYQALASGK	I
1D-7,2D-72,2D-73	143	sp|Q92896|GSLG1_HUMAN	sp	Q92896	GSLG1_HUMAN	Golgi apparatus protein 1 OS=Homo sapiens GN=GLG1 PE=1 SV=2	50	138341	2	2	1	1	0.8	1747	1	1	1	641.367	1280.72	2	1280.71	0.0064	0	36.07	0.0073	R	LLELQYFISR	D
1D-7,2D-72,2D-75	154	sp|Q86YR5|GPSM1_HUMAN	sp	Q86YR5	GPSM1_HUMAN	G-protein-signaling modulator 1 OS=Homo sapiens GN=GPSM1 PE=1 SV=2	29	75091	1	1	1	1	1	4	1	0	1	400.754	799.494	2	799.491	0.0021	1	29.36	0.057	K	ERLAIAK	E
1D-7,2D-73,2D-74	150	sp|Q86YR5|GPSM1_HUMAN	sp	Q86YR5	GPSM1_HUMAN	G-protein-signaling modulator 1 OS=Homo sapiens GN=GPSM1 PE=1 SV=2	29	75091	1	0	1	0	1	2	1	0	1	400.754	799.494	2	799.491	0.0027	1	28.92	0.063	K	ERLAIAK	E
1D-8,2D-82,2D-84	186	sp|Q68CJ6|SLIP_HUMAN	sp	Q68CJ6	SLIP_HUMAN	GTPase SLIP-GC OS=Homo sapiens GN=C8orf80 PE=1 SV=3	33	91930	1	1	1	1	1.4	2041	2	0	1	667.869	1333.72	2	1333.71	0.01	1	33.46	0.019	R	FAEEKVELLEK	A
1D-7	106	sp|P63096|GNAI1_HUMAN	sp	P63096	GNAI1_HUMAN	Guanine nucleotide-binding protein G(i) subunit alpha-1 OS=Homo sapiens GN=GNAI1 PE=1 SV=2	68	40905	3	3	2	2	7.3	849	1	0	0	529.318	1056.62	2	1056.62	0.0028	0	37.74	0.0064	K	LLLLGAGESGK	S
1D-2,2D-27	60	sp|P04899|GNAI2_HUMAN	sp	P04899	GNAI2_HUMAN	Guanine nucleotide-binding protein G(i) subunit alpha-2 OS=Homo sapiens GN=GNAI2 PE=1 SV=3	113	40995	3	3	3	3	11.8	911	1	1	1	529.317	1056.62	2	1056.62	0.0026	0	39.89	0.0039	K	LLLLGAGESGK	S
1D-2,2D-73,2D-75,2D-77	168	sp|Q9UBI6|GBG12_HUMAN	sp	Q9UBI6	GBG12_HUMAN	Guanine nucleotide-binding protein G(I)/G(S)/G(O) subunit gamma-12 OS=Homo sapiens GN=GNG12 PE=1 SV=3	36	8115	1	1	1	1	15.3	1199	1	1	1	573.799	1145.58	2	1145.58	0.005	0	35.8	0.014	K	TASTNNIAQAR	R
1D-2,2D-25	88	sp|P62873|GBB1_HUMAN	sp	P62873	GBB1_HUMAN	Guanine nucleotide-binding protein G(I)/G(S)/G(T) subunit beta-1 OS=Homo sapiens GN=GNB1 PE=1 SV=3	140	38151	6	5	4	4	12.4	3335	1	1	1	864.946	1727.88	2	1727.87	0.0085	1	41.17	0.0035	M	SELDQLRQEAEQLK	N	Acetyl (Protein N-term)
1D-2,2D-26	177	sp|P16520|GBB3_HUMAN	sp	P16520	GBB3_HUMAN	Guanine nucleotide-binding protein G(I)/G(S)/G(T) subunit beta-3 OS=Homo sapiens GN=GNB3 PE=1 SV=1	34	38166	2	2	1	1	2.1	16	1	1	1	403.257	804.499	2	804.497	0.0021	0	34.23	0.0053	K	VHAIPLR	S
1D-2,2D-25	77	sp|P08754|GNAI3_HUMAN	sp	P08754	GNAI3_HUMAN	Guanine nucleotide-binding protein G(k) subunit alpha OS=Homo sapiens GN=GNAI3 PE=1 SV=3	174	41076	8	8	4	4	13	2289	1	0	0	690.863	1379.71	2	1379.71	0.0029	0	49.51	0.00053	K	TTGIVETHFTFK	D
1D-2	130	sp|P50148|GNAQ_HUMAN	sp	P50148	GNAQ_HUMAN	Guanine nucleotide-binding protein G(q) subunit alpha OS=Homo sapiens GN=GNAQ PE=1 SV=4	75	42400	2	2	2	2	6.7	2536	1	1	1	726.876	1451.74	2	1451.73	0.0082	0	44.8	0.0014	K	VSAFENPYVDAIK	S
1D-2,2D-26,2D-27,2D-29	101	sp|Q5JWF2|GNAS1_HUMAN	sp	Q5JWF2	GNAS1_HUMAN	Guanine nucleotide-binding protein G(s) subunit alpha isoforms XLas OS=Homo sapiens GN=GNAS PE=1 SV=2	30	111697	1	1	1	1	1.1	733	1	1	1	529.317	1056.62	2	1056.62	0.002	0	29.74	0.044	R	LLLLGAGESGK	S
1D-2,2D-25	231	sp|P29992|GNA11_HUMAN	sp	P29992	GNA11_HUMAN	Guanine nucleotide-binding protein subunit alpha-11 OS=Homo sapiens GN=GNA11 PE=1 SV=2	31	42382	1	1	1	1	3.1	979	1	1	1	544.323	1086.63	2	1086.63	0.0032	0	30.74	0.04	K	LLLLGTGESGK	S
1D-2,2D-27	191	sp|Q03113|GNA12_HUMAN	sp	Q03113	GNA12_HUMAN	Guanine nucleotide-binding protein subunit alpha-12 OS=Homo sapiens GN=GNA12 PE=1 SV=4	34	44422	2	2	1	1	2.9	546	1	0	1	529.315	1056.62	2	1056.62	-0.0016	0	33.98	0.017	K	ILLLGAGESGK	S
1D-2,2D-23,2D-29	118	sp|Q14344|GNA13_HUMAN	sp	Q14344	GNA13_HUMAN	Guanine nucleotide-binding protein subunit alpha-13 OS=Homo sapiens GN=GNA13 PE=1 SV=2	73	44364	3	3	2	2	5.6	890	1	0	1	529.317	1056.62	2	1056.62	0.0024	0	37.92	0.0068	K	ILLLGAGESGK	S
1D-2,2D-21	223	sp|Q9HAV0|GBB4_HUMAN	sp	Q9HAV0	GBB4_HUMAN	Guanine nucleotide-binding protein subunit beta-4 OS=Homo sapiens GN=GNB4 PE=1 SV=3	28	38284	2	0	1	0	4.1	3580	1	1	1	885.956	1769.9	2	1769.89	0.0065	1	28.12	0.074	M	SELEQLRQEAEQLR	N	Acetyl (Protein N-term)
1D-6,2D-61,2D-63	157	sp|Q9H6D7|HAUS4_HUMAN	sp	Q9H6D7	HAUS4_HUMAN	HAUS augmin-like complex subunit 4 OS=Homo sapiens GN=HAUS4 PE=1 SV=1	31	42829	2	2	1	1	2.2	619	2	0	1	495.805	989.596	2	989.558	0.0383	0	31.28	0.016	R	LLVTELMR	L	Oxidation (M)
1D-6,2D-63	202	sp|Q7Z4H7|HAUS6_HUMAN	sp	Q7Z4H7	HAUS6_HUMAN	HAUS augmin-like complex subunit 6 OS=Homo sapiens GN=HAUS6 PE=1 SV=2	30	109636	1	1	1	1	1	1538	2	0	1	610.815	1219.62	2	1219.59	0.0286	1	30.05	0.051	K	AIEMEENRTK	E
1D-6,2D-66	218	sp|Q9P2D3|HTR5B_HUMAN	sp	Q9P2D3	HTR5B_HUMAN	HEAT repeat-containing protein 5B OS=Homo sapiens GN=HEATR5B PE=1 SV=2	30	226839	1	1	1	1	0.5	1767	2	0	1	631.365	1260.72	2	1260.67	0.0409	0	30.39	0.032	K	MVVSIAEDLLR	T	Oxidation (M)
1D-4,2D-41	67	sp|P08107|HSP71_HUMAN	sp	P08107	HSP71_HUMAN	Heat shock 70 kDa protein 1A/1B OS=Homo sapiens GN=HSPA1A PE=1 SV=5	97	70294	4	3	3	2	5.6	847	1	0	0	509.289	1016.56	2	1016.56	0.0028	1	29.42	0.064	K	ITITNDKGR	L
1D-4,2D-42	55	sp|P34931|HS71L_HUMAN	sp	P34931	HS71L_HUMAN	Heat shock 70 kDa protein 1-like OS=Homo sapiens GN=HSPA1L PE=1 SV=2	221	70730	6	6	4	4	8.1	1458	1	0	0	599.353	1196.69	2	1196.69	0.0043	0	37.07	0.0052	K	DAGVIAGLNVLR	I
1D-4,2D-47	154	sp|P34932|HSP74_HUMAN	sp	P34932	HSP74_HUMAN	Heat shock 70 kDa protein 4 OS=Homo sapiens GN=HSPA4 PE=1 SV=4	47	95127	2	2	1	1	1.5	2026	1	1	1	661.361	1320.71	2	1320.7	0.0047	0	47.2	0.00079	K	VLATAFDTTLGGR	K
1D-4,2D-45,2D-46,2D-47	68	sp|P17066|HSP76_HUMAN	sp	P17066	HSP76_HUMAN	Heat shock 70 kDa protein 6 OS=Homo sapiens GN=HSPA6 PE=1 SV=2	97	71440	4	3	3	2	5.6	3222	1	0	0	844.457	1686.9	2	1686.89	0.0064	0	30	0.045	R	IINEPTAAAIAYGLDR	R
1D-4,2D-41,2D-43,2D-44	28	sp|P11142|HSP7C_HUMAN	sp	P11142	HSP7C_HUMAN	Heat shock cognate 71 kDa protein OS=Homo sapiens GN=HSPA8 PE=1 SV=1	436	71082	16	16	9	9	17.2	1517	1	1	1	600.343	1198.67	2	1198.67	0.0045	0	37	0.0088	K	DAGTIAGLNVLR	I
1D-4,2D-43	107	sp|Q12931|TRAP1_HUMAN	sp	Q12931	TRAP1_HUMAN	Heat shock protein 75 kDa, mitochondrial OS=Homo sapiens GN=TRAP1 PE=1 SV=3	44	80345	2	2	1	1	2	2641	1	0	1	757.399	1512.78	2	1512.78	0.0043	0	44.23	0.0017	R	GVVDSEDIPLNLSR	E
1D-4,2D-47,2D-48,2D-49	173	sp|P04792|HSPB1_HUMAN	sp	P04792	HSPB1_HUMAN	Heat shock protein beta-1 OS=Homo sapiens GN=HSPB1 PE=1 SV=2	38	22826	2	2	1	1	4.9	866	1	1	1	582.317	1162.62	2	1162.61	0.0068	0	31.54	0.033	R	LFDQAFGLPR	L
1D-6,2D-62,2D-66	40	sp|P07900|HS90A_HUMAN	sp	P07900	HS90A_HUMAN	Heat shock protein HSP 90-alpha OS=Homo sapiens GN=HSP90AA1 PE=1 SV=5	273	85006	10	9	5	4	9.6	1558	1	0	1	683.373	1364.73	2	1364.72	0.0093	0	60.38	3.9e-05	R	TLTIVDTGIGMTK	A	Oxidation (M)
1D-6,2D-65	47	sp|P08238|HS90B_HUMAN	sp	P08238	HS90B_HUMAN	Heat shock protein HSP 90-beta OS=Homo sapiens GN=HSP90AB1 PE=1 SV=4	166	83554	6	6	3	3	3.9	1896	1	0	0	638.327	1274.64	2	1274.64	0.0037	0	52.92	0.00024	R	ELISNASDALDK	I
1D-6,2D-69	59	sp|P54652|HSP72_HUMAN	sp	P54652	HSP72_HUMAN	Heat shock-related 70 kDa protein 2 OS=Homo sapiens GN=HSPA2 PE=1 SV=1	249	70263	9	9	6	6	11.3	1608	1	0	0	614.819	1227.62	2	1227.62	0.0037	0	34.94	0.017	K	VEIIANDQGNR	T
1D-6,2D-62,2D-63,2D-68	175	sp|P25092|GUC2C_HUMAN	sp	P25092	GUC2C_HUMAN	Heat-stable enterotoxin receptor OS=Homo sapiens GN=GUCY2C PE=1 SV=2	28	124350	1	0	1	0	1	2560	2	0	1	744.875	1487.73	2	1487.8	-0.0648	1	28.25	0.066	R	KLMYFLVNFWK	T
1D-7,2D-71,2D-72,2D-73,2D-74,	211	sp|P28906|CD34_HUMAN	sp	P28906	CD34_HUMAN	Hematopoietic progenitor cell antigen CD34 OS=Homo sapiens GN=CD34 PE=1 SV=2	29	41091	1	1	1	1	5.2	4403	1	1	1	756.041	2265.1	3	2265.09	0.0095	0	29.13	0.046	K	LGILDFTEQDVASHQSYSQK	T
1D-7,2D-73	39	sp|P69905|HBA_HUMAN	sp	P69905	HBA_HUMAN	Hemoglobin subunit alpha OS=Homo sapiens GN=HBA1 PE=1 SV=2	384	15305	21	21	7	7	65.5	970	1	1	1	544.28	1086.55	2	1086.54	0.0045	0	29.09	0.06	R	MFLSFPTTK	T	Oxidation (M)
1D-7,2D-72	76	sp|P68871|HBB_HUMAN	sp	P68871	HBB_HUMAN	Hemoglobin subunit beta OS=Homo sapiens GN=HBB PE=1 SV=2	179	16102	5	5	3	3	29.9	1939	1	1	1	657.838	1313.66	2	1313.66	0.0033	0	35.41	0.013	K	VNVDEVGGEALGR	L
1D-7,2D-75	78	sp|P69891|HBG1_HUMAN	sp	P69891	HBG1_HUMAN	Hemoglobin subunit gamma-1 OS=Homo sapiens GN=HBG1 PE=1 SV=2	44	16187	3	3	1	1	8.8	1849	1	1	1	658.827	1315.64	2	1315.64	0.0024	0	42.38	0.0026	K	VNVEDAGGETLGR	L
1D-7,2D-77,2D-78	45	sp|P69892|HBG2_HUMAN	sp	P69892	HBG2_HUMAN	Hemoglobin subunit gamma-2 OS=Homo sapiens GN=HBG2 PE=1 SV=2	177	16173	6	6	3	3	29.9	1522	1	1	1	597.812	1193.61	2	1193.61	0.0022	0	51.53	0.00033	K	MVTGVASALSSR	Y	Oxidation (M)
1D-3,2D-35	143	sp|O60506|HNRPQ_HUMAN	sp	O60506	HNRPQ_HUMAN	Heterogeneous nuclear ribonucleoprotein Q OS=Homo sapiens GN=SYNCRIP PE=1 SV=2	30	69788	1	1	1	1	2.2	1996	2	0	1	722.911	1443.81	2	1443.76	0.0514	2	29.89	0.037	K	VADSSKGPDEAKIK	A
1D-3,2D-32,2D-37	135	sp|P07910|HNRPC_HUMAN	sp	P07910	HNRPC_HUMAN	Heterogeneous nuclear ribonucleoproteins C1/C2 OS=Homo sapiens GN=HNRNPC PE=1 SV=4	45	33707	1	1	1	1	3.9	1997	1	1	1	658.903	1315.79	2	1315.79	0.0053	0	44.99	0.00052	R	VFIGNLNTLVVK	K
1D-8	33	sp|P19367|HXK1_HUMAN	sp	P19367	HXK1_HUMAN	Hexokinase-1 OS=Homo sapiens GN=HK1 PE=1 SV=3	336	103561	15	14	8	8	10.7	341	1	1	1	460.747	919.48	2	919.476	0.0037	0	35.37	0.015	K	EGLLFEGR	I
1D-9,2D-92,2D-93	170	sp|Q02539|H11_HUMAN	sp	Q02539	H11_HUMAN	Histone H1.1 OS=Homo sapiens GN=HIST1H1A PE=1 SV=3	37	21829	1	1	1	1	5.1	1122	1	1	1	554.29	1106.56	2	1106.56	0.0039	0	36.94	0.01	K	ALAAAGYDVEK	N
1D-9,2D-91	195	sp|P0C0S8|H2A1_HUMAN	sp	P0C0S8	H2A1_HUMAN	Histone H2A type 1 OS=Homo sapiens GN=HIST1H2AG PE=1 SV=2	33	14083	1	1	1	1	14.6	3963	1	1	1	966.091	1930.17	2	1930.16	0.0053	0	33.29	0.0029	K	VTIAQGGVLPNIQAVLLPK	K
1D-9,2D-95	106	sp|P0C0S5|H2AZ_HUMAN	sp	P0C0S5	H2AZ_HUMAN	Histone H2A.Z OS=Homo sapiens GN=H2AFZ PE=1 SV=2	42	13545	2	2	1	1	7	449	1	1	1	472.769	943.524	2	943.524	0.0003	0	41.56	0.0042	R	AGLQFPVGR	I
1D-9,2D-97	156	sp|Q5QNW6|H2B2F_HUMAN	sp	Q5QNW6	H2B2F_HUMAN	Histone H2B type 2-F OS=Homo sapiens GN=HIST2H2BF PE=1 SV=3	39	13912	1	1	1	1	11.9	3472	1	1	1	888.413	1774.81	2	1774.8	0.0094	0	39.22	0.0039	K	AMGIMNSFVNDIFER	I	2 Oxidation (M)
1D-9,2D-98	178	sp|P62805|H4_HUMAN	sp	P62805	H4_HUMAN	Histone H4 OS=Homo sapiens GN=HIST1H4A PE=1 SV=2	33	11360	2	2	1	1	7.8	561	1	1	1	495.294	988.573	2	988.571	0.0023	0	33.45	0.017	K	VFLENVIR	D
1D-9,2D-97,2D-99	114	sp|O14686|MLL2_HUMAN	sp	O14686	MLL2_HUMAN	Histone-lysine N-methyltransferase MLL2 OS=Homo sapiens GN=MLL2 PE=1 SV=2	37	599575	2	2	1	1	0.1	461	1	0	1	476.244	950.473	2	950.446	0.0271	0	31.56	0.03	K	IYEEQNR	G
1D-8	114	sp|P01891|1A68_HUMAN	sp	P01891	1A68_HUMAN	HLA class I histocompatibility antigen, A-68 alpha chain OS=Homo sapiens GN=HLA-A PE=1 SV=4	85	41168	4	4	2	2	10.4	2375	1	1	1	815.424	1628.83	2	1628.82	0.0144	0	50.16	0.00048	R	FIAVGYVDDTQFVR	F
1D-82	175	sp|Q9TNN7|1C05_HUMAN	sp	Q9TNN7	1C05_HUMAN	HLA class I histocompatibility antigen, Cw-5 alpha chain OS=Homo sapiens GN=HLA-C PE=2 SV=1	38	41342	3	3	1	1	6.6	4392	1	1	1	879.738	2636.19	3	2636.18	0.0086	0	38.11	0.004	R	DGEDQTQDTELVETRPAGDGTFQK	W
1D-6	90	sp|Q16543|CDC37_HUMAN	sp	Q16543	CDC37_HUMAN	Hsp90 co-chaperone Cdc37 OS=Homo sapiens GN=CDC37 PE=1 SV=1	38	44953	1	1	1	1	3.7	2507	1	1	1	510.584	1528.73	3	1528.77	-0.0443	1	38.12	0.0057	K	ELEVAEGGKAELER	L
1D-7	177	sp|P54257|HAP1_HUMAN	sp	P54257	HAP1_HUMAN	Huntingtin-associated protein 1 OS=Homo sapiens GN=HAP1 PE=1 SV=3	37	76200	1	1	1	1	1.6	1976	1	0	1	657.307	1312.6	2	1312.63	-0.0338	1	37.28	0.0049	R	MYGAETEKLQK	Q	Oxidation (M)
1D-3,2D-33,2D-34	85	sp|Q16836|HCDH_HUMAN	sp	Q16836	HCDH_HUMAN	Hydroxyacyl-coenzyme A dehydrogenase, mitochondrial OS=Homo sapiens GN=HADH PE=1 SV=3	157	34329	6	6	4	4	15.3	2347	1	1	1	698.819	1395.62	2	1395.62	0.0041	1	28.37	0.034	R	GDASKEDIDTAMK	L	Oxidation (M)
1D-3,2D-35	122	sp|Q6YN16|HSDL2_HUMAN	sp	Q6YN16	HSDL2_HUMAN	Hydroxysteroid dehydrogenase-like protein 2 OS=Homo sapiens GN=HSDL2 PE=1 SV=1	86	45651	2	2	1	1	4.3	3659	1	1	1	917.999	1833.98	2	1833.97	0.0103	0	85.59	1.1e-07	K	LLGTIYTAAEEIEAVGGK	A
1D-3,2D-36	21	sp|Q9Y4L1|HYOU1_HUMAN	sp	Q9Y4L1	HYOU1_HUMAN	Hypoxia up-regulated protein 1 OS=Homo sapiens GN=HYOU1 PE=1 SV=1	406	111494	17	17	8	8	11.8	4077	1	1	1	1048.02	2094.02	2	2094.01	0.0103	0	73.53	1.7e-06	K	NINADEAAAMGAVYQAAALSK	A	Oxidation (M)
1D-5,2D-53	192	sp|P01857|IGHG1_HUMAN	sp	P01857	IGHG1_HUMAN	Ig gamma-1 chain C region OS=Homo sapiens GN=IGHG1 PE=1 SV=1	35	36596	1	1	1	1	5.2	3783	1	1	1	937.47	1872.92	2	1872.91	0.0103	0	34.73	0.015	K	TTPPVLDSDGSFFLYSK	L
1D-5,2D-54,2D-58	78	sp|P01834|IGKC_HUMAN	sp	P01834	IGKC_HUMAN	Ig kappa chain C region OS=Homo sapiens GN=IGKC PE=1 SV=1	69	11773	2	2	2	2	31.1	3739	1	1	1	938.467	1874.92	2	1874.92	-0.0006	0	38.25	0.0064	K	VYACEVTHQGLSSPVTK	S
1D-5,2D-51,2D-53	243	sp|P55899|FCGRN_HUMAN	sp	P55899	FCGRN_HUMAN	IgG receptor FcRn large subunit p51 OS=Homo sapiens GN=FCGRT PE=1 SV=1	29	40060	1	1	1	1	3.8	3214	1	1	1	845.896	1689.78	2	1689.77	0.0058	0	29.32	0.036	K	FALNGEEFMNFDLK	Q	Oxidation (M)
1D-8,2D-82	81	sp|Q14974|IMB1_HUMAN	sp	Q14974	IMB1_HUMAN	Importin subunit beta-1 OS=Homo sapiens GN=KPNB1 PE=1 SV=2	41	98420	2	2	1	1	1.7	2303	1	1	1	803.448	1604.88	2	1604.88	0.0051	0	41.43	0.0025	K	LAATNALLNSLEFTK	A
1D-8	171	sp|Q9H2U2|IPYR2_HUMAN	sp	Q9H2U2	IPYR2_HUMAN	Inorganic pyrophosphatase 2, mitochondrial OS=Homo sapiens GN=PPA2 PE=1 SV=2	39	38409	1	1	1	1	3.9	1519	1	1	1	678.363	1354.71	2	1354.71	0.0029	0	38.65	0.0059	K	LIAINANDPEASK	F
1D-7	113	sp|Q9NPH2|INO1_HUMAN	sp	Q9NPH2	INO1_HUMAN	Inositol-3-phosphate synthase 1 OS=Homo sapiens GN=ISYNA1 PE=1 SV=1	92	61542	3	3	2	2	5.2	3041	1	1	1	817.478	1632.94	2	1632.94	0.0065	0	34.31	0.0078	K	APLVPPGSPVVNALFR	Q
1D-3,2D-31	94	sp|P56199|ITA1_HUMAN	sp	P56199	ITA1_HUMAN	Integrin alpha-1 OS=Homo sapiens GN=ITGA1 PE=1 SV=2	116	132304	5	5	3	3	4.2	3621	1	1	1	706.058	2115.15	3	2115.14	0.0163	0	34.57	0.011	R	TIVHYSPNLVFSGIEAIQK	D
1D-3,2D-33	31	sp|P17301|ITA2_HUMAN	sp	P17301	ITA2_HUMAN	Integrin alpha-2 OS=Homo sapiens GN=ITGA2 PE=1 SV=1	294	130468	12	11	5	5	6.5	3832	1	1	1	968.447	1934.88	2	1934.87	0.0076	0	61.65	2e-05	K	DCGEDGLCISDLVLDVR	Q
1D-3,2D-34,2D-35	47	sp|P26006|ITA3_HUMAN	sp	P26006	ITA3_HUMAN	Integrin alpha-3 OS=Homo sapiens GN=ITGA3 PE=1 SV=5	113	117735	4	4	3	3	3.4	451	1	1	1	487.296	972.578	2	972.576	0.0026	0	28.18	0.055	R	YLLLAGAPR	E
1D-3,2D-36	53	sp|P08648|ITA5_HUMAN	sp	P08648	ITA5_HUMAN	Integrin alpha-5 OS=Homo sapiens GN=ITGA5 PE=1 SV=2	96	115605	2	2	2	2	3.5	2859	1	1	1	990.987	1979.96	2	1979.95	0.0116	0	35.94	0.01	R	DLDGNGYPDLIVGSFGVDK	A
1D-3,2D-35,2D-37	23	sp|P23229|ITA6_HUMAN	sp	P23229	ITA6_HUMAN	Integrin alpha-6 OS=Homo sapiens GN=ITGA6 PE=1 SV=4	446	127751	19	19	10	10	11.2	874	1	1	1	583.817	1165.62	2	1165.62	0.0021	0	43.69	0.0017	K	LNYLDILMR	A	Oxidation (M)
1D-3,2D-38	72	sp|P08514|ITA2B_HUMAN	sp	P08514	ITA2B_HUMAN	Integrin alpha-IIb OS=Homo sapiens GN=ITGA2B PE=1 SV=3	111	114446	5	5	2	2	2.3	1117	1	1	1	561.284	1120.55	2	1120.55	0.0028	0	44.35	0.0018	R	ALSNVEGFER	L
1D-3,2D-39	44	sp|P06756|ITAV_HUMAN	sp	P06756	ITAV_HUMAN	Integrin alpha-V OS=Homo sapiens GN=ITGAV PE=1 SV=2	244	117048	7	6	6	5	10.6	2601	1	1	1	567.685	1700.03	3	1700.02	0.0084	2	36.57	0.0016	R	KLNFQVELLLDKLK	Q
1D-3,2D-32,2D-33	76	sp|P05556|ITB1_HUMAN	sp	P05556	ITB1_HUMAN	Integrin beta-1 OS=Homo sapiens GN=ITGB1 PE=1 SV=2	46	91664	4	3	1	1	1.3	630	1	1	1	508.294	1014.57	2	1014.57	0.0027	0	45.5	0.0016	K	SAVTTVVNPK	Y
1D-3,2D-34	161	sp|P05107|ITB2_HUMAN	sp	P05107	ITB2_HUMAN	Integrin beta-2 OS=Homo sapiens GN=ITGB2 PE=1 SV=2	54	87976	2	2	1	1	2	3173	1	1	1	836.958	1671.9	2	1671.89	0.0065	0	54.32	0.00017	K	LAENNIQPIFAVTSR	M
1D-3,2D-36	73	sp|P05106|ITB3_HUMAN	sp	P05106	ITB3_HUMAN	Integrin beta-3 OS=Homo sapiens GN=ITGB3 PE=1 SV=2	92	90194	2	2	2	2	4.2	254	1	1	1	441.745	881.475	2	881.472	0.0027	0	35.49	0.008	K	THIALDGR	L
1D-3,2D-37	56	sp|P16144|ITB4_HUMAN	sp	P16144	ITB4_HUMAN	Integrin beta-4 OS=Homo sapiens GN=ITGB4 PE=1 SV=5	89	205745	4	4	2	2	1.5	1881	1	1	1	714.41	1426.81	2	1426.8	0.0021	0	53.66	0.00015	K	LLELQEVDSLLR	G
1D-5,2D-52,2D-53,2D-55	114	sp|Q12905|ILF2_HUMAN	sp	Q12905	ILF2_HUMAN	Interleukin enhancer-binding factor 2 OS=Homo sapiens GN=ILF2 PE=1 SV=2	42	43263	2	2	1	1	3.6	2317	1	1	1	705.424	1408.83	2	1408.83	0.0041	0	34.55	0.0049	K	ILPTLEAVAALGNK	V
1D-5,2D-53	219	sp|P22301|IL10_HUMAN	sp	P22301	IL10_HUMAN	Interleukin-10 OS=Homo sapiens GN=IL10 PE=1 SV=1	29	20845	1	0	1	0	3.9	304	1	1	1	454.231	906.448	2	906.427	0.0207	0	28.6	0.07	R	FLPCENK	S
1D-5,2D-53,2D-56	201	sp|Q9NWB7|IFT57_HUMAN	sp	Q9NWB7	IFT57_HUMAN	Intraflagellar transport protein 57 homolog OS=Homo sapiens GN=IFT57 PE=1 SV=1	30	49249	2	2	1	1	2.1	612	2	0	1	500.776	999.537	2	999.582	-0.0452	2	30.14	0.048	R	KSNLKAPSR	H
1D-6,2D-61	144	sp|Q96CN7|ISOC1_HUMAN	sp	Q96CN7	ISOC1_HUMAN	Isochorismatase domain-containing protein 1 OS=Homo sapiens GN=ISOC1 PE=1 SV=3	42	32501	1	1	1	1	5	2692	1	1	1	758.917	1515.82	2	1515.81	0.0048	0	42.17	0.0028	K	GLGSTVQEIDLTGVK	L
1D-6,2D-63	64	sp|P50213|IDH3A_HUMAN	sp	P50213	IDH3A_HUMAN	Isocitrate dehydrogenase [NAD] subunit alpha, mitochondrial OS=Homo sapiens GN=IDH3A PE=1 SV=1	102	40022	4	4	2	2	7.4	2257	1	1	1	696.381	1390.75	2	1390.75	0.0016	0	67.26	8.3e-06	K	TPYTDVNIVTIR	E
1D-6,2D-65,2D-67	48	sp|O43837|IDH3B_HUMAN	sp	O43837	IDH3B_HUMAN	Isocitrate dehydrogenase [NAD] subunit beta, mitochondrial OS=Homo sapiens GN=IDH3B PE=1 SV=2	160	42442	7	7	3	3	10.9	1839	1	1	1	461.612	1381.81	3	1381.81	0.006	1	34.96	0.006	R	KLDLFANVVHVK	S
1D-6,2D-66	167	sp|P51553|IDH3G_HUMAN	sp	P51553	IDH3G_HUMAN	Isocitrate dehydrogenase [NAD] subunit gamma, mitochondrial OS=Homo sapiens GN=IDH3G PE=1 SV=1	32	43166	2	2	1	1	5.1	4136	1	1	1	726.376	2176.11	3	2176.1	0.0041	0	31.92	0.027	R	HTVTMIPGDGIGPELMLHVK	S	2 Oxidation (M)
1D-6,2D-68	127	sp|O75874|IDHC_HUMAN	sp	O75874	IDHC_HUMAN	Isocitrate dehydrogenase [NADP] cytoplasmic OS=Homo sapiens GN=IDH1 PE=1 SV=2	77	46915	2	2	2	2	5.3	2101	1	1	1	671.343	1340.67	2	1340.67	0.0036	0	42.09	0.0026	K	TVEAEAAHGTVTR	H
1D-6,2D-62	51	sp|P48735|IDHP_HUMAN	sp	P48735	IDHP_HUMAN	Isocitrate dehydrogenase [NADP], mitochondrial OS=Homo sapiens GN=IDH2 PE=1 SV=2	85	51333	3	3	2	2	5.8	1979	1	1	1	678.352	1354.69	2	1354.68	0.0046	0	44.78	0.0014	K	TIEAEAAHGTVTR	H
1D-3,2D-65	169	sp|Q9NSE4|SYIM_HUMAN	sp	Q9NSE4	SYIM_HUMAN	Isoleucyl-tRNA synthetase, mitochondrial OS=Homo sapiens GN=IARS2 PE=1 SV=2	39	114688	1	1	1	1	1.2	1266	1	1	1	636.858	1271.7	2	1271.7	0.0036	0	38.78	0.0059	K	AVLEEGTDVVIK	M
1D-3,2D-61,2D-67	63	sp|P26440|IVD_HUMAN	sp	P26440	IVD_HUMAN	Isovaleryl-CoA dehydrogenase, mitochondrial OS=Homo sapiens GN=IVD PE=1 SV=1	185	46803	8	8	4	4	13.5	4588	1	1	1	857.752	2570.23	3	2570.22	0.0101	0	42.36	0.0021	K	LISGEYIGALAMSEPNAGSDVVSMK	L	2 Oxidation (M)
1D-3	199	sp|Q9Y664|KPTN_HUMAN	sp	Q9Y664	KPTN_HUMAN	Kaptin OS=Homo sapiens GN=KPTN PE=2 SV=2	29	48449	1	1	1	1	2.5	1468	1	1	1	601.862	1201.71	2	1201.75	-0.0454	1	29.34	0.033	K	RGLVVGITFIK	D
1D-3	208	sp|Q7Z4H8|KDEL2_HUMAN	sp	Q7Z4H8	KDEL2_HUMAN	KDEL motif-containing protein 2 OS=Homo sapiens GN=KDELC2 PE=1 SV=2	31	58934	1	1	1	1	1.4	42	2	0	1	413.781	825.547	2	825.544	0.0033	0	30.96	0.0068	R	ALLLQLR	L
1D-6,2D-60	174	sp|Q7Z3Y8|K1C27_HUMAN	sp	Q7Z3Y8	K1C27_HUMAN	Keratin, type I cytoskeletal 27 OS=Homo sapiens GN=KRT27 PE=1 SV=2	38	50419	2	2	1	1	2	829	2	0	1	532.809	1063.6	2	1063.57	0.0375	0	38.17	0.0048	R	LASYLENVR	A
1D-6,2D-67,2D-69	106	sp|P04264|K2C1_HUMAN	sp	P04264	K2C1_HUMAN	Keratin, type II cytoskeletal 1 OS=Homo sapiens GN=KRT1 PE=1 SV=6	44	66170	1	1	1	1	1.9	1663	1	1	1	651.864	1301.71	2	1301.71	0.0054	0	46.91	0.00092	R	SLDLDSIIAEVK	A
1D-6,2D-63,2D-64	217	sp|Q3SY84|K2C71_HUMAN	sp	Q3SY84	K2C71_HUMAN	Keratin, type II cytoskeletal 71 OS=Homo sapiens GN=KRT71 PE=1 SV=3	31	57769	1	1	1	1	2.1	1968	2	0	1	656.337	1310.66	2	1310.65	0.006	0	30.66	0.035	K	LALDMEIATYR	K	Oxidation (M)
1D-4,2D-41	195	sp|O43896|KIF1C_HUMAN	sp	O43896	KIF1C_HUMAN	Kinesin-like protein KIF1C OS=Homo sapiens GN=KIF1C PE=1 SV=3	30	123725	1	1	1	1	0.7	255	1	1	1	444.716	887.418	2	887.435	-0.0164	0	30.13	0.027	R	GAEVEDLR	A
1D-4,2D-43	193	sp|O95235|KI20A_HUMAN	sp	O95235	KI20A_HUMAN	Kinesin-like protein KIF20A OS=Homo sapiens GN=KIF20A PE=1 SV=1	32	101242	1	1	1	1	0.8	282	1	1	1	437.256	872.498	2	872.487	0.011	0	32.04	0.041	K	QNLVPFR	D
1D-4,2D-48	185	sp|Q9ULI4|KI26A_HUMAN	sp	Q9ULI4	KI26A_HUMAN	Kinesin-like protein KIF26A OS=Homo sapiens GN=KIF26A PE=1 SV=3	34	197091	1	1	1	1	0.6	1413	2	0	1	587.808	1173.6	2	1173.58	0.0202	0	33.61	0.023	K	AVGTPMAASTPR	G	Oxidation (M)
1D-4	153	sp|Q2M1P5|KIF7_HUMAN	sp	Q2M1P5	KIF7_HUMAN	Kinesin-like protein KIF7 OS=Homo sapiens GN=KIF7 PE=1 SV=2	29	151407	1	1	1	1	0.5	4	1	1	1	400.754	799.494	2	799.491	0.0021	1	29.36	0.057	K	REAILAK	K
1D-4,2D-49	149	sp|Q2M1P5|KIF7_HUMAN	sp	Q2M1P5	KIF7_HUMAN	Kinesin-like protein KIF7 OS=Homo sapiens GN=KIF7 PE=1 SV=2	29	151407	1	0	1	0	0.5	2	1	1	1	400.754	799.494	2	799.491	0.0027	1	28.92	0.063	K	REAILAK	K
1D-3,2D-36,2D-37	146	sp|O15229|KMO_HUMAN	sp	O15229	KMO_HUMAN	Kynurenine 3-monooxygenase OS=Homo sapiens GN=KMO PE=1 SV=2	34	56344	1	1	1	1	2.7	2702	1	1	1	763.402	1524.79	2	1524.78	0.007	0	34.1	0.017	K	LLTSNDVVDFFQK	Y
1D-3,2D-32,2D-39	242	sp|O00515|LAD1_HUMAN	sp	O00515	LAD1_HUMAN	Ladinin-1 OS=Homo sapiens GN=LAD1 PE=1 SV=2	28	57154	1	0	1	0	3.5	3424	2	0	1	882.472	1762.93	2	1762.89	0.0405	1	28.13	0.068	K	TSVSEKSLAPGMALGSGR	R	Oxidation (M)
1D-3,2D-33	98	sp|P11047|LAMC1_HUMAN	sp	P11047	LAMC1_HUMAN	Laminin subunit gamma-1 OS=Homo sapiens GN=LAMC1 PE=1 SV=3	34	183191	1	1	1	1	0.9	2291	1	1	1	721.897	1441.78	2	1441.78	0.0026	0	33.62	0.02	R	LSAEDLVLEGAGLR	V
1D-1,2D-3,2D-4	114	sp|P48449|ERG7_HUMAN	sp	P48449	ERG7_HUMAN	Lanosterol synthase OS=Homo sapiens GN=LSS PE=1 SV=1	92	84453	3	3	2	2	4	2980	1	1	1	804.913	1607.81	2	1607.8	0.0066	0	53.78	0.00021	R	EQTGLEAYALGLDTK	N
1D-7,2D-71	203	sp|Q01650|LAT1_HUMAN	sp	Q01650	LAT1_HUMAN	Large neutral amino acids transporter small subunit 1 OS=Homo sapiens GN=SLC7A5 PE=1 SV=2	37	55659	1	1	1	1	3.6	3232	1	1	1	851.406	1700.8	2	1700.8	0.0017	0	37.13	0.0065	K	SADGSAPAGEGEGVTLQR	N
1D-7,2D-78,2D-79	148	sp|Q8N370|LAT4_HUMAN	sp	Q8N370	LAT4_HUMAN	Large neutral amino acids transporter small subunit 4 OS=Homo sapiens GN=SLC43A2 PE=1 SV=1	37	63618	1	1	1	1	1.9	1842	1	1	1	638.846	1275.68	2	1275.67	0.0038	0	36.93	0.01	K	LCLSTVDLEVK	C
1D-7,2D-75,2D-77	161	sp|O95202|LETM1_HUMAN	sp	O95202	LETM1_HUMAN	LETM1 and EF-hand domain-containing protein 1, mitochondrial OS=Homo sapiens GN=LETM1 PE=1 SV=1	41	83986	1	1	1	1	2	3172	1	1	1	839.925	1677.83	2	1677.83	0.0065	0	41.04	0.0037	R	AMYLPDTLSPADQLK	S	Oxidation (M)
1D-6,2D-61	29	sp|P42704|LPPRC_HUMAN	sp	P42704	LPPRC_HUMAN	Leucine-rich PPR motif-containing protein, mitochondrial OS=Homo sapiens GN=LRPPRC PE=1 SV=3	390	159003	13	13	8	8	8.3	1639	1	1	1	696.86	1391.7	2	1391.7	0.008	0	50.68	0.00041	K	MLNGLEDSIGLSK	M	Oxidation (M)
1D-6,2D-63	188	sp|A4D1F6|LRRD1_HUMAN	sp	A4D1F6	LRRD1_HUMAN	Leucine-rich repeat and death domain-containing protein 1 OS=Homo sapiens GN=LRRD1 PE=2 SV=2	35	98943	1	1	1	1	1	200	1	0	1	458.276	914.538	2	914.555	-0.0164	0	34.67	0.018	K	LSLTAAALR	D
1D-6,2D-66	227	sp|Q6P9F7|LRC8B_HUMAN	sp	Q6P9F7	LRC8B_HUMAN	Leucine-rich repeat-containing protein 8B OS=Homo sapiens GN=LRRC8B PE=2 SV=2	29	93528	1	1	1	1	1.7	3404	2	0	1	864.946	1727.88	2	1727.92	-0.0435	1	31.55	0.032	K	QINLNNEWTVEKLK	S
1D-6,2D-69	126	sp|Q8NAA5|CQ076_HUMAN	sp	Q8NAA5	CQ076_HUMAN	Leucine-rich repeat-containing protein C17orf76 OS=Homo sapiens GN=C17orf76 PE=2 SV=2	36	37985	1	1	1	1	2	263	1	1	1	433.759	865.504	2	865.466	0.0385	0	36.03	0.0052	R	VTSYLQR	C
1D-9	45	sp|Q9UIQ6|LCAP_HUMAN	sp	Q9UIQ6	LCAP_HUMAN	Leucyl-cystinyl aminopeptidase OS=Homo sapiens GN=LNPEP PE=1 SV=3	109	117787	4	4	3	3	3.3	435	1	1	1	483.312	964.609	2	964.607	0.0021	0	30.79	0.0054	R	LPTAVVPLR	Y
1D-9	190	sp|Q08722|CD47_HUMAN	sp	Q08722	CD47_HUMAN	Leukocyte surface antigen CD47 OS=Homo sapiens GN=CD47 PE=1 SV=1	35	35590	2	2	1	1	2.5	371	1	1	1	465.288	928.561	2	928.559	0.0021	0	35.02	0.012	K	IEVSQLLK	G
1D-3,2D-35	116	sp|O14495|LPP3_HUMAN	sp	O14495	LPP3_HUMAN	Lipid phosphate phosphohydrolase 3 OS=Homo sapiens GN=PPAP2B PE=1 SV=1	77	35720	3	3	2	2	7.7	2493	1	1	1	734.401	1466.79	2	1466.78	0.0109	0	34.33	0.015	R	STIQNPYVAALYK	Q
1D-5,2D-53,2D-57	206	sp|Q7Z3E5|ARMC9_HUMAN	sp	Q7Z3E5	ARMC9_HUMAN	LisH domain-containing protein ARMC9 OS=Homo sapiens GN=ARMC9 PE=2 SV=2	32	92445	2	2	1	1	1.5	2577	2	0	1	742.369	1482.72	2	1482.7	0.0274	1	31.54	0.026	R	CFIKEGNAEMIR	Q	Oxidation (M)
1D-5,2D-52	175	sp|Q8IVB5|LIX1L_HUMAN	sp	Q8IVB5	LIX1L_HUMAN	LIX1-like protein OS=Homo sapiens GN=LIX1L PE=2 SV=1	30	36825	1	1	1	1	3	509	1	1	1	486.248	970.482	2	970.52	-0.0374	0	30.06	0.029	R	LQPGVGTSGR	G
1D-5,2D-57	31	sp|P00338|LDHA_HUMAN	sp	P00338	LDHA_HUMAN	L-lactate dehydrogenase A chain OS=Homo sapiens GN=LDHA PE=1 SV=2	393	36950	16	16	8	8	27.7	1788	1	1	1	632.844	1263.67	2	1263.67	0.0028	0	30.96	0.035	K	QVVESAYEVIK	L
1D-5,2D-56	52	sp|P07195|LDHB_HUMAN	sp	P07195	LDHB_HUMAN	L-lactate dehydrogenase B chain OS=Homo sapiens GN=LDHB PE=1 SV=2	257	36900	7	7	5	5	20.4	2760	1	1	1	755.893	1509.77	2	1509.77	0.0044	1	50.27	0.00041	K	IVADKDYSVTANSK	I
1D-5,2D-59	81	sp|P36776|LONM_HUMAN	sp	P36776	LONM_HUMAN	Lon protease homolog, mitochondrial OS=Homo sapiens GN=LONP1 PE=1 SV=2	141	106936	5	4	3	3	5.4	4423	1	1	1	1059.21	3174.62	3	3174.61	0.0087	0	41.13	0.0022	K	IVSGEAESVEVTPENLQDFVGKPVFTVER	M
1D-5	235	sp|Q9UKU0|ACSL6_HUMAN	sp	Q9UKU0	ACSL6_HUMAN	Long-chain-fatty-acid--CoA ligase 6 OS=Homo sapiens GN=ACSL6 PE=2 SV=4	29	78728	1	0	1	0	1	254	2	0	1	444.252	886.489	2	886.487	0.0022	0	28.55	0.09	M	QTQEILR	I
1D-5	176	sp|P31994|FCG2B_HUMAN	sp	P31994	FCG2B_HUMAN	Low affinity immunoglobulin gamma Fc region receptor II-b OS=Homo sapiens GN=FCGR2B PE=1 SV=2	51	34421	1	1	1	1	8.7	4896	1	1	1	1019.83	3056.46	3	3056.44	0.0165	1	50.53	0.00025	K	VGAENTITYSLLMHPDALEEPDDQNRI	-	Oxidation (M)
1D-5,2D-54,2D-59	201	sp|Q7Z4W1|DCXR_HUMAN	sp	Q7Z4W1	DCXR_HUMAN	L-xylulose reductase OS=Homo sapiens GN=DCXR PE=1 SV=2	37	26182	1	1	1	1	4.5	1403	1	0	1	592.353	1182.69	2	1182.71	-0.0174	0	37.26	0.0045	R	AVIQVSQIVAR	G
1D-5,2D-59	212	sp|Q8N371|KDM8_HUMAN	sp	Q8N371	KDM8_HUMAN	Lysine-specific demethylase 8 OS=Homo sapiens GN=JMJD5 PE=1 SV=1	29	47867	1	1	1	1	1.7	116	1	1	1	421.759	841.504	2	841.502	0.0017	1	28.61	0.046	K	LEKTVPR	L
1D-5,2D-56	105	sp|Q6P1A2|MBOA5_HUMAN	sp	Q6P1A2	MBOA5_HUMAN	Lysophospholipid acyltransferase 5 OS=Homo sapiens GN=LPCAT3 PE=1 SV=1	30	56511	1	1	1	1	2.5	1707	1	1	1	641.376	1280.74	2	1280.73	0.0033	0	30.31	0.023	K	LVQGELIDIPGK	I
1D-5,2D-51	81	sp|P11117|PPAL_HUMAN	sp	P11117	PPAL_HUMAN	Lysosomal acid phosphatase OS=Homo sapiens GN=ACP2 PE=1 SV=3	134	48713	5	5	3	3	7.1	2080	1	1	1	672.356	1342.7	2	1342.69	0.0057	0	49.06	0.00059	R	FLFGIYQQAEK	A
1D-5,2D-54	194	sp|Q14108|SCRB2_HUMAN	sp	Q14108	SCRB2_HUMAN	Lysosome membrane protein 2 OS=Homo sapiens GN=SCARB2 PE=1 SV=2	34	54712	1	1	1	1	2.1	1558	1	1	1	606.801	1211.59	2	1211.58	0.006	0	33.58	0.015	R	VEEVGPYTYR	E
1D-5,2D-55	83	sp|P11279|LAMP1_HUMAN	sp	P11279	LAMP1_HUMAN	Lysosome-associated membrane glycoprotein 1 OS=Homo sapiens GN=LAMP1 PE=1 SV=3	139	45367	6	5	3	3	8.6	506	1	1	1	517.282	1032.55	2	1032.55	0.0043	0	28.81	0.071	K	TVESITDIR	A
1D-5,2D-57	144	sp|P13473|LAMP2_HUMAN	sp	P13473	LAMP2_HUMAN	Lysosome-associated membrane glycoprotein 2 OS=Homo sapiens GN=LAMP2 PE=1 SV=2	32	45503	1	1	1	1	2	722	1	1	1	494.286	986.557	2	986.555	0.0019	0	32.37	0.032	R	IPLNDLFR	C
1D-3	198	sp|Q15046|SYK_HUMAN	sp	Q15046	SYK_HUMAN	Lysyl-tRNA synthetase OS=Homo sapiens GN=KARS PE=1 SV=3	39	68461	2	2	1	1	1.8	2203	1	1	1	690.882	1379.75	2	1379.74	0.0052	0	38.83	0.0053	R	YLDLILNDFVR	Q
1D-6	103	sp|P22897|MRC1_HUMAN	sp	P22897	MRC1_HUMAN	Macrophage mannose receptor 1 OS=Homo sapiens GN=MRC1 PE=1 SV=1	47	168870	1	1	1	1	1.1	3737	1	1	1	942.999	1883.98	2	1883.98	0.0059	0	46.88	0.00084	R	YEQAFLTSFVGLRPEK	Y
1D-6,2D-61,2D-63	120	sp|P40926|MDHM_HUMAN	sp	P40926	MDHM_HUMAN	Malate dehydrogenase, mitochondrial OS=Homo sapiens GN=MDH2 PE=1 SV=3	36	35937	1	1	1	1	3.3	1714	1	1	1	617.365	1232.72	2	1232.71	0.0032	0	36.28	0.0064	K	IFGVTTLDIVR	A
1D-6,2D-66,2D-67	114	sp|O75352|MPU1_HUMAN	sp	O75352	MPU1_HUMAN	Mannose-P-dolichol utilization defect 1 protein OS=Homo sapiens GN=MPDU1 PE=1 SV=2	72	26906	2	2	1	1	5.7	1861	1	1	1	648.918	1295.82	2	1295.82	0.0046	0	71.81	4.2e-07	K	GLGLGIVAGSLLVK	L
1D-7,2D-73,2D-74	120	sp|Q13724|MOGS_HUMAN	sp	Q13724	MOGS_HUMAN	Mannosyl-oligosaccharide glucosidase OS=Homo sapiens GN=MOGS PE=1 SV=5	70	92032	3	3	1	1	1.4	1834	1	1	1	641.875	1281.74	2	1281.73	0.0064	0	29.31	0.028	R	LGPLLDILADSR	H
1D-7	147	sp|O15232|MATN3_HUMAN	sp	O15232	MATN3_HUMAN	Matrilin-3 OS=Homo sapiens GN=MATN3 PE=1 SV=2	31	54379	1	1	1	1	1.4	216	1	1	1	426.752	851.489	2	851.45	0.0385	0	31.24	0.016	K	VSSYLQR	L
1D-7,2D-78	246	sp|P11310|ACADM_HUMAN	sp	P11310	ACADM_HUMAN	Medium-chain specific acyl-CoA dehydrogenase, mitochondrial OS=Homo sapiens GN=ACADM PE=1 SV=1	29	47015	1	1	1	1	2.6	1620	1	1	1	615.861	1229.71	2	1229.7	0.0055	1	28.93	0.045	R	GIVFEDVKVPK	E
1D-7,2D-73	66	sp|Q16853|AOC3_HUMAN	sp	Q16853	AOC3_HUMAN	Membrane primary amine oxidase OS=Homo sapiens GN=AOC3 PE=1 SV=3	177	85138	9	9	4	4	11	743	1	1	1	561.818	1121.62	2	1121.62	-0.0017	0	41.34	0.0028	R	EALAIVFFGR	Q
1D-7,2D-79	170	sp|O15173|PGRC2_HUMAN	sp	O15173	PGRC2_HUMAN	Membrane-associated progesterone receptor component 2 OS=Homo sapiens GN=PGRMC2 PE=1 SV=1	39	23861	1	1	1	1	8.5	2591	1	1	1	849.43	1696.85	2	1696.84	0.008	0	38.75	0.0059	R	GLGAGAGAGEESPATSLPR	M
1D-8,2D-82,2D-86	165	sp|Q687X5|STEA4_HUMAN	sp	Q687X5	STEA4_HUMAN	Metalloreductase STEAP4 OS=Homo sapiens GN=STEAP4 PE=1 SV=1	42	52518	2	2	1	1	3.9	3661	1	1	1	918.989	1835.96	2	1835.95	0.011	0	41.61	0.0029	K	TTLLPSGAEVLSYSEAAK	K
1D-8,2D-87	64	sp|Q9HCC0|MCCB_HUMAN	sp	Q9HCC0	MCCB_HUMAN	Methylcrotonoyl-CoA carboxylase beta chain, mitochondrial OS=Homo sapiens GN=MCCC2 PE=1 SV=1	128	61808	3	3	2	2	5.5	3592	1	1	1	909.989	1817.96	2	1817.96	0.007	0	64.75	1.4e-05	R	ISVMGGEQAANVLATITK	D	Oxidation (M)
1D-8,2D-88	169	sp|P22033|MUTA_HUMAN	sp	P22033	MUTA_HUMAN	Methylmalonyl-CoA mutase, mitochondrial OS=Homo sapiens GN=MUT PE=1 SV=4	44	83538	2	2	1	1	1.5	1875	1	1	1	642.35	1282.68	2	1282.68	0.0036	0	34.32	0.014	K	IIADIFEYTAK	H
1D-8,2D-82	121	sp|Q9H8H3|MET7A_HUMAN	sp	Q9H8H3	MET7A_HUMAN	Methyltransferase-like protein 7A OS=Homo sapiens GN=METTL7A PE=1 SV=1	55	28814	2	2	1	1	6.1	3024	1	1	1	812.407	1622.8	2	1622.79	0.0044	0	54.58	0.00015	R	ELFSNLQEFAGPSGK	L
1D-8	143	sp|O14880|MGST3_HUMAN	sp	O14880	MGST3_HUMAN	Microsomal glutathione S-transferase 3 OS=Homo sapiens GN=MGST3 PE=1 SV=1	55	16734	2	2	1	1	8.6	1388	1	1	1	656.893	1311.77	2	1311.77	0.0054	0	49.21	0.0003	R	IASGLGLAWIVGR	V
1D-8,2D-81,2D-83	228	sp|P46821|MAP1B_HUMAN	sp	P46821	MAP1B_HUMAN	Microtubule-associated protein 1B OS=Homo sapiens GN=MAP1B PE=1 SV=2	31	271665	1	1	1	1	0.5	2318	2	0	1	707.385	1412.76	2	1412.8	-0.0426	2	31.41	0.033	K	QATDVKPKAAKEK	T
1D-8,2D-82	257	sp|P11137|MAP2_HUMAN	sp	P11137	MAP2_HUMAN	Microtubule-associated protein 2 OS=Homo sapiens GN=MAP2 PE=1 SV=4	28	199860	1	1	1	1	0.4	404	1	1	1	465.296	928.577	2	928.611	-0.0343	0	30.65	0.027	K	FILKPAIK	Y
1D-8,2D-88,2D-89	111	sp|Q8TCT9|HM13_HUMAN	sp	Q8TCT9	HM13_HUMAN	Minor histocompatibility antigen H13 OS=Homo sapiens GN=HM13 PE=1 SV=1	112	41747	4	4	2	2	9.5	2086	1	1	1	669.305	1336.6	2	1336.59	0.0028	0	69.08	3e-06	K	NASDMPETITSR	D	Oxidation (M)
1D-4,2D-42,2D-43	63	sp|Q02978|M2OM_HUMAN	sp	Q02978	M2OM_HUMAN	Mitochondrial 2-oxoglutarate/malate carrier protein OS=Homo sapiens GN=SLC25A11 PE=1 SV=3	63	34211	3	3	1	1	5.1	2287	1	1	1	721.374	1440.73	2	1440.73	0.0016	0	33.73	0.019	M	AATASAGAGGIDGKPR	T	Acetyl (Protein N-term)
1D-4,2D-42	110	sp|Q9Y276|BCS1_HUMAN	sp	Q9Y276	BCS1_HUMAN	Mitochondrial chaperone BCS1 OS=Homo sapiens GN=BCS1L PE=1 SV=1	41	47676	2	2	1	1	2.4	1451	1	1	1	619.335	1236.66	2	1236.65	0.0052	0	40.82	0.0033	K	VFFNILEEAR	E
1D-4,2D-45	192	sp|Q9Y3D6|FIS1_HUMAN	sp	Q9Y3D6	FIS1_HUMAN	Mitochondrial fission 1 protein OS=Homo sapiens GN=FIS1 PE=1 SV=2	40	16984	1	1	1	1	7.2	1587	1	1	1	612.388	1222.76	2	1222.75	0.0068	0	39.81	0.00086	K	GIVLLEELLPK	G
1D-4,2D-47	164	sp|O43615|TIM44_HUMAN	sp	O43615	TIM44_HUMAN	Mitochondrial import inner membrane translocase subunit TIM44 OS=Homo sapiens GN=TIMM44 PE=1 SV=2	46	51666	1	1	1	1	2.9	2481	1	1	1	716.874	1431.73	2	1431.73	0.0045	0	46.06	0.0012	R	ILDIDNVDLAMGK	M	Oxidation (M)
1D-4,2D-48	149	sp|Q3ZCQ8|TIM50_HUMAN	sp	Q3ZCQ8	TIM50_HUMAN	Mitochondrial import inner membrane translocase subunit TIM50 OS=Homo sapiens GN=TIMM50 PE=1 SV=2	47	39850	1	1	1	1	4.5	3749	1	1	1	956.497	1910.98	2	1910.97	0.0065	0	47.3	0.00081	K	IPDEFDNDPILVQQLR	R
1D-4,2D-49	61	sp|Q16891|IMMT_HUMAN	sp	Q16891	IMMT_HUMAN	Mitochondrial inner membrane protein OS=Homo sapiens GN=IMMT PE=1 SV=1	64	84026	3	3	2	2	3.7	794	1	1	1	527.266	1052.52	2	1052.51	0.0038	0	28.88	0.049	R	GVYSEETLR	A
1D-4,2D-42,2D-43	166	sp|Q13164|MK07_HUMAN	sp	Q13164	MK07_HUMAN	Mitogen-activated protein kinase 7 OS=Homo sapiens GN=MAPK7 PE=1 SV=2	33	88787	1	1	1	1	1	656	2	0	1	500.302	998.589	2	998.562	0.0271	1	32.71	0.02	R	EGIRQQIR	F
1D-3,2D-35,2D-36	54	sp|P26038|MOES_HUMAN	sp	P26038	MOES_HUMAN	Moesin OS=Homo sapiens GN=MSN PE=1 SV=3	253	67892	10	10	5	5	10.1	1553	1	1	1	603.789	1205.56	2	1205.56	0.0045	0	28.42	0.054	K	AQMVQEDLEK	T	Oxidation (M)
1D-3,2D-31	128	sp|Q9NZB8|MOCS1_HUMAN	sp	Q9NZB8	MOCS1_HUMAN	Molybdenum cofactor biosynthesis protein 1 OS=Homo sapiens GN=MOCS1 PE=1 SV=3	33	70859	1	1	1	1	1.1	72	1	1	1	415.233	828.452	2	828.416	0.0355	0	32.77	0.029	K	VMEGIHK	A	Oxidation (M)
1D-3,2D-36	146	sp|P08571|CD14_HUMAN	sp	P08571	CD14_HUMAN	Monocyte differentiation antigen CD14 OS=Homo sapiens GN=CD14 PE=1 SV=2	62	40678	1	1	1	1	5.1	4046	1	1	1	987.006	1972	2	1971.99	0.0071	0	62.31	2.6e-05	R	AFPALTSLDLSDNPGLGER	G
1D-3,2D-37	85	sp|O15440|MRP5_HUMAN	sp	O15440	MRP5_HUMAN	Multidrug resistance-associated protein 5 OS=Homo sapiens GN=ABCC5 PE=1 SV=2	38	161641	1	1	1	1	1	2328	3	0	1	807.925	1613.84	2	1613.78	0.0531	0	38.3	0.0071	R	AEGLSLDASMHSQLR	I
1D-3,2D-39	197	sp|Q9UL68|MYT1L_HUMAN	sp	Q9UL68	MYT1L_HUMAN	Myelin transcription factor 1-like protein OS=Homo sapiens GN=MYT1L PE=2 SV=3	29	135126	1	1	1	1	0.8	832	1	1	1	527.749	1053.48	2	1053.46	0.0252	1	29.45	0.031	R	EKMAMEAGR	R	2 Oxidation (M)
1D-3,2D-37	95	sp|Q9NZM1|MYOF_HUMAN	sp	Q9NZM1	MYOF_HUMAN	Myoferlin OS=Homo sapiens GN=MYOF PE=1 SV=1	113	236100	4	4	3	3	1.9	1288	1	1	1	638.385	1274.75	2	1274.75	0.0061	0	38.25	0.0031	R	ILVELATFLEK	T
1D-7	76	sp|P14649|MYL6B_HUMAN	sp	P14649	MYL6B_HUMAN	Myosin light chain 6B OS=Homo sapiens GN=MYL6B PE=1 SV=1	48	22864	1	1	1	1	6.3	1697	1	1	1	677.871	1353.73	2	1353.73	0.0028	0	47.62	0.00069	R	ALGQNPTNAEVLK	V
1D-7,2D-75	104	sp|P60660|MYL6_HUMAN	sp	P60660	MYL6_HUMAN	Myosin light polypeptide 6 OS=Homo sapiens GN=MYL6 PE=1 SV=2	75	17090	3	3	2	2	14.6	640	1	1	1	498.299	994.583	2	994.581	0.0015	0	32.41	0.011	R	HVLVTLGEK	M
1D-7,2D-75,2D-77	219	sp|Q12965|MYO1E_HUMAN	sp	Q12965	MYO1E_HUMAN	Myosin-Ie OS=Homo sapiens GN=MYO1E PE=1 SV=2	30	127552	1	1	1	1	1.2	1698	1	1	1	705.903	1409.79	2	1409.82	-0.0328	2	29.76	0.03	K	QGPDKGLVKEVLK	R
1D-7,2D-78	214	sp|B2RTY4|MYO9A_HUMAN	sp	B2RTY4	MYO9A_HUMAN	Myosin-IXa OS=Homo sapiens GN=MYO9A PE=1 SV=2	31	294917	1	1	1	1	0.6	3739	2	0	1	917.452	1832.89	2	1832.94	-0.0529	1	30.74	0.036	R	DSLGESPVRVWVNTFK	V
1D-3,2D-35	186	sp|Q9UM54|MYO6_HUMAN	sp	Q9UM54	MYO6_HUMAN	Myosin-VI OS=Homo sapiens GN=MYO6 PE=1 SV=4	35	150965	2	2	1	1	0.9	1467	2	0	1	666.902	1331.79	2	1331.78	0.0084	1	28.38	0.026	K	FKTQLNLLLDK	L
1D-3	123	sp|Q13423|NNTM_HUMAN	sp	Q13423	NNTM_HUMAN	NAD(P) transhydrogenase, mitochondrial OS=Homo sapiens GN=NNT PE=1 SV=3	37	114564	1	1	1	1	1.1	1885	1	1	1	635.851	1269.69	2	1269.68	0.0058	0	36.74	0.009	K	SLGAEPLEVDLK	E
1D-3,2D-35	188	sp|P23368|MAOM_HUMAN	sp	P23368	MAOM_HUMAN	NAD-dependent malic enzyme, mitochondrial OS=Homo sapiens GN=ME2 PE=1 SV=1	33	66029	2	2	1	1	3.1	3414	1	1	1	887.995	1773.98	2	1773.97	0.0053	0	33.18	0.016	R	ILGLGDLGVYGMGIPVGK	L	Oxidation (M)
1D-3,2D-5,2D-7	187	sp|Q9P0J0|NDUAD_HUMAN	sp	Q9P0J0	NDUAD_HUMAN	NADH dehydrogenase [ubiquinone] 1 alpha subcomplex subunit 13 OS=Homo sapiens GN=NDUFA13 PE=1 SV=3	34	16688	1	1	1	1	9	2455	1	1	1	726.929	1451.84	2	1451.83	0.0079	0	34.45	0.007	R	IALLPLLQAETDR	R
1D-1,2D-2	167	sp|Q16718|NDUA5_HUMAN	sp	Q16718	NDUA5_HUMAN	NADH dehydrogenase [ubiquinone] 1 alpha subcomplex subunit 5 OS=Homo sapiens GN=NDUFA5 PE=1 SV=3	39	13507	2	2	1	1	8.6	879	1	1	1	584.844	1167.67	2	1167.68	-0.0024	0	38.7	0.0033	K	ILDVLEEIPK	N
1D-1,2D-3,2D-4	197	sp|P56556|NDUA6_HUMAN	sp	P56556	NDUA6_HUMAN	NADH dehydrogenase [ubiquinone] 1 alpha subcomplex subunit 6 OS=Homo sapiens GN=NDUFA6 PE=1 SV=3	31	17973	2	2	1	1	5.2	345	1	1	1	449.804	897.593	2	897.59	0.0029	0	30.87	0.0084	R	VVDLLVIK	G
1D-1,2D-2	176	sp|P51970|NDUA8_HUMAN	sp	P51970	NDUA8_HUMAN	NADH dehydrogenase [ubiquinone] 1 alpha subcomplex subunit 8 OS=Homo sapiens GN=NDUFA8 PE=1 SV=3	37	20548	2	2	1	1	10.5	3931	1	1	1	670.049	2007.13	3	2007.11	0.0115	1	36.59	0.005	M	PGIVELPTLEELKVDEVK	I
1D-1,2D-2,2D-7	166	sp|Q16795|NDUA9_HUMAN	sp	Q16795	NDUA9_HUMAN	NADH dehydrogenase [ubiquinone] 1 alpha subcomplex subunit 9, mitochondrial OS=Homo sapiens GN=NDUFA9 PE=1 SV=2	38	42654	2	2	1	1	2.7	944	1	1	1	534.825	1067.64	2	1067.63	0.002	0	36.61	0.0043	K	IPQAIAQLSK	E
1D-1,2D-6	204	sp|O96000|NDUBA_HUMAN	sp	O96000	NDUBA_HUMAN	NADH dehydrogenase [ubiquinone] 1 beta subcomplex subunit 10 OS=Homo sapiens GN=NDUFB10 PE=1 SV=3	32	21048	1	1	1	1	8.1	2308	1	1	1	538.653	1612.94	3	1612.93	0.0074	0	31.82	0.015	K	AFDLIVDRPVTLVR	E
1D-1,2D-5	138	sp|O95168|NDUB4_HUMAN	sp	O95168	NDUB4_HUMAN	NADH dehydrogenase [ubiquinone] 1 beta subcomplex subunit 4 OS=Homo sapiens GN=NDUFB4 PE=1 SV=3	60	15256	4	4	1	1	7.8	650	1	1	1	548.329	1094.64	2	1094.64	-0.0009	0	60.08	1.7e-05	R	GLIENPALLR	W
1D-1,2D-4	166	sp|O43674|NDUB5_HUMAN	sp	O43674	NDUB5_HUMAN	NADH dehydrogenase [ubiquinone] 1 beta subcomplex subunit 5, mitochondrial OS=Homo sapiens GN=NDUFB5 PE=1 SV=1	40	21737	1	1	1	1	7.9	2665	1	1	1	573.314	1716.92	3	1716.91	0.011	1	39.6	0.0046	R	TMAVLQIEAEKAELR	V	Oxidation (M)
1D-1,2D-5	158	sp|Q9Y6M9|NDUB9_HUMAN	sp	Q9Y6M9	NDUB9_HUMAN	NADH dehydrogenase [ubiquinone] 1 beta subcomplex subunit 9 OS=Homo sapiens GN=NDUFB9 PE=1 SV=3	43	22045	2	2	1	1	7.8	2264	1	1	1	801.922	1601.83	2	1601.82	0.0091	0	42.83	0.0026	M	AFLASGPYLTHQQK	V	Acetyl (Protein N-term)
1D-1,2D-1,2D-2,2D-3	153	sp|P49821|NDUV1_HUMAN	sp	P49821	NDUV1_HUMAN	NADH dehydrogenase [ubiquinone] flavoprotein 1, mitochondrial OS=Homo sapiens GN=NDUFV1 PE=1 SV=4	47	51469	1	1	1	1	4.3	3550	1	1	1	1034.5	2066.99	2	2066.98	0.0044	0	47.27	0.00071	R	GAGAYICGEETALIESIEGK	Q
1D-1,2D-6	156	sp|P19404|NDUV2_HUMAN	sp	P19404	NDUV2_HUMAN	NADH dehydrogenase [ubiquinone] flavoprotein 2, mitochondrial OS=Homo sapiens GN=NDUFV2 PE=1 SV=2	32	27659	1	1	1	1	5.2	2039	1	1	1	668.903	1335.79	2	1335.79	0.0046	0	31.61	0.01	K	AAAVLPVLDLAQR	Q
1D-1,2D-8	167	sp|O75306|NDUS2_HUMAN	sp	O75306	NDUS2_HUMAN	NADH dehydrogenase [ubiquinone] iron-sulfur protein 2, mitochondrial OS=Homo sapiens GN=NDUFS2 PE=1 SV=2	38	52911	2	2	1	1	2.6	2474	1	1	1	729.877	1457.74	2	1457.74	0.0037	0	32.62	0.027	R	LDELEELLTNNR	I
1D-1,2D-10	59	sp|O75489|NDUS3_HUMAN	sp	O75489	NDUS3_HUMAN	NADH dehydrogenase [ubiquinone] iron-sulfur protein 3, mitochondrial OS=Homo sapiens GN=NDUFS3 PE=1 SV=1	178	30337	9	9	4	4	20.5	2185	1	1	1	693.387	1384.76	2	1384.76	0.0032	0	40	0.0042	K	SLVDLTAVDVPTR	Q
1D-1,2D-3,2D-4	182	sp|O00217|NDUS8_HUMAN	sp	O00217	NDUS8_HUMAN	NADH dehydrogenase [ubiquinone] iron-sulfur protein 8, mitochondrial OS=Homo sapiens GN=NDUFS8 PE=1 SV=1	34	24203	3	1	1	1	5.2	1803	1	1	1	637.336	1272.66	2	1272.65	0.0042	0	34.2	0.019	R	GLGMTLSYLFR	E	Oxidation (M)
1D-1,2D-2	32	sp|Q9UHQ9|NB5R1_HUMAN	sp	Q9UHQ9	NB5R1_HUMAN	NADH-cytochrome b5 reductase 1 OS=Homo sapiens GN=CYB5R1 PE=1 SV=1	335	34244	12	12	8	8	28.5	480	1	1	1	513.259	1024.5	2	1024.5	0.0027	0	32.06	0.021	K	GFVTADMIR	E	Oxidation (M)
1D-1,2D-6	67	sp|P00387|NB5R3_HUMAN	sp	P00387	NB5R3_HUMAN	NADH-cytochrome b5 reductase 3 OS=Homo sapiens GN=CYB5R3 PE=1 SV=3	216	34441	8	8	4	4	15.6	2248	1	1	1	686.373	1370.73	2	1370.73	0.003	0	36.74	0.0099	R	STPAITLESPDIK	Y
1D-1,2D-8	37	sp|P28331|NDUS1_HUMAN	sp	P28331	NDUS1_HUMAN	NADH-ubiquinone oxidoreductase 75 kDa subunit, mitochondrial OS=Homo sapiens GN=NDUFS1 PE=1 SV=3	306	80443	10	10	5	5	11.6	2996	1	1	1	920.505	1839	2	1838.99	0.0072	0	41.45	0.0025	K	ILQDIASGSHPFSQVLK	E
1D-1,2D-7	170	sp|P03886|NU1M_HUMAN	sp	P03886	NU1M_HUMAN	NADH-ubiquinone oxidoreductase chain 1 OS=Homo sapiens GN=MT-ND1 PE=1 SV=1	38	35637	2	2	1	1	6	3898	1	1	1	995.512	1989.01	2	1989	0.0071	0	33.72	0.018	K	GPNVVGPYGLLQPFADAMK	L	Oxidation (M)
1D-1,2D-9	128	sp|P03905|NU4M_HUMAN	sp	P03905	NU4M_HUMAN	NADH-ubiquinone oxidoreductase chain 4 OS=Homo sapiens GN=MT-ND4 PE=1 SV=1	65	51718	2	2	2	2	6.3	3685	1	1	1	636.034	1905.08	3	1905.08	0.0059	0	31.31	0.015	K	AHVEAPIAGSMVLAAVLLK	L	Oxidation (M)
1D-1,2D-8,2D-9	157	sp|P03915|NU5M_HUMAN	sp	P03915	NU5M_HUMAN	NADH-ubiquinone oxidoreductase chain 5 OS=Homo sapiens GN=MT-ND5 PE=1 SV=2	43	67325	1	1	1	1	1.8	1218	1	1	1	629.866	1257.72	2	1257.71	0.0066	0	43.45	0.0017	R	MILLTLTGQPR	F	Oxidation (M)
1D-1,2D-2	157	sp|P03923|NU6M_HUMAN	sp	P03923	NU6M_HUMAN	NADH-ubiquinone oxidoreductase chain 6 OS=Homo sapiens GN=MT-ND6 PE=1 SV=2	42	18667	1	1	1	1	8	2591	1	1	1	748.858	1495.7	2	1495.69	0.0077	0	42.15	0.0022	R	EDPIGAGALYDYGR	W
1D-2,1D-3,2D-16,2D-23,2D-29	29	sp|P16435|NCPR_HUMAN	sp	P16435	NCPR_HUMAN	NADPH--cytochrome P450 reductase OS=Homo sapiens GN=POR PE=1 SV=2	434	77097	19	19	9	9	17.4	2907	1	1	1	518.594	1552.76	3	1552.76	0.0046	0	35.42	0.013	R	HLMHLELDISDSK	I	Oxidation (M)
1D-4,1D-6,2D-47,2D-63,2D-69	174	sp|Q7Z494|NPHP3_HUMAN	sp	Q7Z494	NPHP3_HUMAN	Nephrocystin-3 OS=Homo sapiens GN=NPHP3 PE=1 SV=1	40	151967	2	2	1	1	0.6	673	1	1	1	501.765	1001.52	2	1001.55	-0.0349	1	40	0.0059	R	ELESKLQR	L
1D-5	168	sp|P08473|NEP_HUMAN	sp	P08473	NEP_HUMAN	Neprilysin OS=Homo sapiens GN=MME PE=1 SV=2	44	86144	2	2	1	1	1.5	1873	1	1	1	642.339	1282.66	2	1282.66	0.0051	0	37.49	0.0067	R	FIMDLVSSLSR	T	Oxidation (M)
1D-5,2D-51,2D-53	117	sp|Q8NF91|SYNE1_HUMAN	sp	Q8NF91	SYNE1_HUMAN	Nesprin-1 OS=Homo sapiens GN=SYNE1 PE=1 SV=3	29	1017069	2	0	1	0	0.1	1338	2	0	1	593.313	1184.61	2	1184.59	0.0183	1	28.55	0.071	K	EMFATMSKLK	E
1D-6,2D-61,2D-62	124	sp|Q9ULB1|NRX1A_HUMAN	sp	Q9ULB1	NRX1A_HUMAN	Neurexin-1-alpha OS=Homo sapiens GN=NRXN1 PE=2 SV=1	28	164061	1	1	1	1	0.5	169	1	1	1	428.767	855.519	2	855.481	0.0374	1	28.26	0.044	R	LAKQGDPK	M
1D-7	120	sp|Q8NFP9|NBEA_HUMAN	sp	Q8NFP9	NBEA_HUMAN	Neurobeachin OS=Homo sapiens GN=NBEA PE=1 SV=3	57	330066	3	3	2	2	0.6	571	2	0	1	491.75	981.486	2	981.52	-0.0344	0	29.5	0.037	R	LFLSDMIK	L	Oxidation (M)
1D-7	247	sp|Q8IVL1|NAV2_HUMAN	sp	Q8IVL1	NAV2_HUMAN	Neuron navigator 2 OS=Homo sapiens GN=NAV2 PE=1 SV=3	29	269314	1	0	1	0	0.4	596	2	0	1	495.779	989.544	2	989.551	-0.0067	2	28.91	0.071	K	KSSLKGNEK	E
1D-8,2D-81	234	sp|Q8N729|NPW_HUMAN	sp	Q8N729	NPW_HUMAN	Neuropeptide W OS=Homo sapiens GN=NPW PE=1 SV=2	29	18094	1	0	1	0	5.5	326	2	0	1	457.757	913.5	2	913.498	0.0023	0	28.56	0.057	R	SSQAGIPVR	A
1D-8,2D-85	118	sp|Q8NC67|NETO2_HUMAN	sp	Q8NC67	NETO2_HUMAN	Neuropilin and tolloid-like protein 2 OS=Homo sapiens GN=NETO2 PE=1 SV=1	29	60495	2	0	1	0	1.9	1338	2	0	1	593.313	1184.61	2	1184.57	0.0435	1	28.55	0.071	K	VMACKTAFNK	T	Oxidation (M)
1D-8,2D-85	212	sp|Q9Y639|NPTN_HUMAN	sp	Q9Y639	NPTN_HUMAN	Neuroplastin OS=Homo sapiens GN=NPTN PE=1 SV=2	31	44702	1	1	1	1	2.5	912	1	1	1	533.294	1064.57	2	1064.57	0.0018	1	30.96	0.032	K	AAPDITGHKR	S
1D-8,2D-89	249	sp|P56730|NETR_HUMAN	sp	P56730	NETR_HUMAN	Neurotrypsin OS=Homo sapiens GN=PRSS12 PE=2 SV=2	29	99399	1	0	1	0	1.1	1071	2	0	1	554.273	1106.53	2	1106.54	-0.0068	0	28.75	0.059	K	ESLSSVCGLR	L
1D-8,2D-82	51	sp|Q14697|GANAB_HUMAN	sp	Q14697	GANAB_HUMAN	Neutral alpha-glucosidase AB OS=Homo sapiens GN=GANAB PE=1 SV=3	251	107263	12	12	6	6	6.8	879	1	1	1	533.799	1065.58	2	1065.58	0.0018	0	39.38	0.004	K	NPEPELLVR	W
1D-8,2D-82,2D-89	52	sp|Q15758|AAAT_HUMAN	sp	Q15758	AAAT_HUMAN	Neutral amino acid transporter B(0) OS=Homo sapiens GN=SLC1A5 PE=1 SV=2	97	57018	4	4	2	2	5.7	1487	1	1	1	639.343	1276.67	2	1276.67	0.0045	0	51.84	0.00032	K	EVLDSFLDLAR	N
1D-8,2D-84,2D-87	176	sp|Q6PIU2|NCEH1_HUMAN	sp	Q6PIU2	NCEH1_HUMAN	Neutral cholesterol ester hydrolase 1 OS=Homo sapiens GN=NCEH1 PE=1 SV=3	30	46064	1	1	1	1	2.9	2247	1	1	1	697.906	1393.8	2	1393.79	0.0038	0	29.55	0.028	R	IVQELPQLLDAR	S
1D-7,2D-72,2D-75	148	sp|Q92542|NICA_HUMAN	sp	Q92542	NICA_HUMAN	Nicastrin OS=Homo sapiens GN=NCSTN PE=1 SV=2	42	79103	2	2	1	1	1.7	2181	1	1	1	686.872	1371.73	2	1371.72	0.0051	0	41.91	0.0031	R	NQVEDLLATLEK	S
1D-7,2D-78,2D-79	112	sp|P14543|NID1_HUMAN	sp	P14543	NID1_HUMAN	Nidogen-1 OS=Homo sapiens GN=NID1 PE=1 SV=3	73	139142	3	3	2	2	2.2	1342	1	1	1	588.823	1175.63	2	1175.63	0.002	0	35.47	0.015	R	YALSNSIGPVR	E
1D-7,2D-78	189	sp|Q14112|NID2_HUMAN	sp	Q14112	NID2_HUMAN	Nidogen-2 OS=Homo sapiens GN=NID2 PE=1 SV=3	32	153952	2	2	1	1	0.8	2049	1	1	1	668.869	1335.72	2	1335.72	0.0038	0	28.25	0.057	K	VLFYTDLVNPR	A
1D-7,2D-75	84	sp|O15118|NPC1_HUMAN	sp	O15118	NPC1_HUMAN	Niemann-Pick C1 protein OS=Homo sapiens GN=NPC1 PE=1 SV=2	100	144868	3	3	2	2	2	2756	1	1	1	768.385	1534.75	2	1534.75	0.0057	0	46.45	0.0011	R	FLPMFLSDNPNPK	C	Oxidation (M)
1D-6,2D-61	130	sp|Q9GZT8|NIF3L_HUMAN	sp	Q9GZT8	NIF3L_HUMAN	NIF3-like protein 1 OS=Homo sapiens GN=NIF3L1 PE=1 SV=2	77	42341	2	2	2	2	6.4	1877	1	1	1	647.847	1293.68	2	1293.68	0.0043	0	35.19	0.015	K	ALMQVVDFLSR	N	Oxidation (M)
1D-6,2D-62,2D-63,2D-68	91	sp|Q5JPE7|NOMO2_HUMAN	sp	Q5JPE7	NOMO2_HUMAN	Nodal modulator 2 OS=Homo sapiens GN=NOMO2 PE=1 SV=1	38	140435	1	1	1	1	1.2	2501	1	1	1	763.43	1524.84	2	1524.84	0.0049	0	37.79	0.0056	K	SSIDSEPALVLGPLK	S
1D-6,2D-61,2D-62	209	sp|P49790|NU153_HUMAN	sp	P49790	NU153_HUMAN	Nuclear pore complex protein Nup153 OS=Homo sapiens GN=NUP153 PE=1 SV=2	29	155440	1	1	1	1	0.9	811	1	1	1	515.744	1029.47	2	1029.48	-0.0103	0	29.37	0.029	M	ASGAGGVGGGGGGK	I	Acetyl (Protein N-term)
1D-6,2D-66	161	sp|P51449|RORG_HUMAN	sp	P51449	RORG_HUMAN	Nuclear receptor ROR-gamma OS=Homo sapiens GN=RORC PE=1 SV=2	30	59356	1	1	1	1	1.7	1648	1	1	1	606.771	1211.53	2	1211.57	-0.0446	1	29.79	0.019	K	SYRETCQLR	L
1D-6,2D-61	220	sp|Q96F24|NRBF2_HUMAN	sp	Q96F24	NRBF2_HUMAN	Nuclear receptor-binding factor 2 OS=Homo sapiens GN=NRBF2 PE=1 SV=1	28	32529	1	1	1	1	4.5	2956	1	1	1	805.949	1609.88	2	1609.86	0.0233	1	28.35	0.05	R	DSHMKQLLLIQER	W
1D-5,2D-53,2D-57	112	sp|P19338|NUCL_HUMAN	sp	P19338	NUCL_HUMAN	Nucleolin OS=Homo sapiens GN=NCL PE=1 SV=3	41	76625	2	2	1	1	3.1	3506	1	1	1	834.435	2500.28	3	2500.26	0.0244	0	34.92	0.012	K	TLVLSNLSYSATEETLQEVFEK	A
1D-9	146	sp|Q9H340|O51B6_HUMAN	sp	Q9H340	O51B6_HUMAN	Olfactory receptor 51B6 OS=Homo sapiens GN=OR51B6 PE=2 SV=2	32	35759	1	1	1	1	2.6	548	1	1	1	478.746	955.478	2	955.524	-0.0459	0	31.55	0.021	R	LFSLPHSR	A
1D-9	232	sp|O14581|OR7AH_HUMAN	sp	O14581	OR7AH_HUMAN	Olfactory receptor 7A17 OS=Homo sapiens GN=OR7A17 PE=2 SV=1	29	34674	1	0	1	0	3.2	1544	2	0	1	602.33	1202.64	2	1202.64	0.0009	0	28.55	0.076	K	MLINIQTQSR	V
1D-5,2D-51,2D-57	153	sp|Q9NRP0|OSTC_HUMAN	sp	Q9NRP0	OSTC_HUMAN	Oligosaccharyltransferase complex subunit OSTC OS=Homo sapiens GN=OSTC PE=1 SV=1	31	16932	1	1	1	1	8.1	2376	1	1	1	714.902	1427.79	2	1427.78	0.005	0	30.8	0.034	R	VPFLVLECPNLK	L
1D-5,2D-50,2D-51	170	sp|Q13219|PAPP1_HUMAN	sp	Q13219	PAPP1_HUMAN	Pappalysin-1 OS=Homo sapiens GN=PAPPA PE=1 SV=3	31	185645	1	1	1	1	0.7	1292	1	1	1	582.321	1162.63	2	1162.62	0.0031	0	30.91	0.038	R	SPAVITGLYDK	C
1D-6,2D-61,2D-62	176	sp|Q96AY3|FKB10_HUMAN	sp	Q96AY3	FKB10_HUMAN	Peptidyl-prolyl cis-trans isomerase FKBP10 OS=Homo sapiens GN=FKBP10 PE=1 SV=1	38	64717	2	2	1	1	1.5	1038	1	1	1	548.76	1095.5	2	1095.5	0.0027	0	34.01	0.011	R	EVQMGDFVR	Y	Oxidation (M)
1D-6	158	sp|O95302|FKBP9_HUMAN	sp	O95302	FKBP9_HUMAN	Peptidyl-prolyl cis-trans isomerase FKBP9 OS=Homo sapiens GN=FKBP9 PE=1 SV=2	29	63500	1	1	1	1	1.8	1145	1	1	1	557.275	1112.54	2	1112.55	-0.0146	0	28.72	0.04	R	DSTFNVFVGK	G
1D-7,2D-72	138	sp|Q06830|PRDX1_HUMAN	sp	Q06830	PRDX1_HUMAN	Peroxiredoxin-1 OS=Homo sapiens GN=PRDX1 PE=1 SV=1	31	22324	1	1	1	1	6	2184	1	1	1	680.405	1358.8	2	1358.79	0.0031	1	31.41	0.017	R	GLFIIDDKGILR	Q
1D-7,2D-73,2D-79	90	sp|Q13162|PRDX4_HUMAN	sp	Q13162	PRDX4_HUMAN	Peroxiredoxin-4 OS=Homo sapiens GN=PRDX4 PE=1 SV=1	86	30749	3	3	2	2	8.1	1562	1	1	1	606.819	1211.62	2	1211.62	0.0054	0	38.13	0.0058	R	LVQAFQYTDK	H
1D-7,2D-75,2D-77	81	sp|P30044|PRDX5_HUMAN	sp	P30044	PRDX5_HUMAN	Peroxiredoxin-5, mitochondrial OS=Homo sapiens GN=PRDX5 PE=1 SV=4	131	22301	4	4	3	3	17.8	1588	1	1	1	619.829	1237.64	2	1237.64	0.0054	0	40.27	0.0039	R	FSMVVQDGIVK	A	Oxidation (M)
1D-8	146	sp|P51659|DHB4_HUMAN	sp	P51659	DHB4_HUMAN	Peroxisomal multifunctional enzyme type 2 OS=Homo sapiens GN=HSD17B4 PE=1 SV=3	43	80092	1	1	1	1	2	2668	1	1	1	748.947	1495.88	2	1495.87	0.0063	0	43.08	0.00079	K	LGLLGLANSLAIEGR	K
1D-5	109	sp|Q00325|MPCP_HUMAN	sp	Q00325	MPCP_HUMAN	Phosphate carrier protein, mitochondrial OS=Homo sapiens GN=SLC25A3 PE=1 SV=2	86	40525	4	4	2	2	6.1	2102	1	1	1	681.365	1360.71	2	1360.71	0.0047	0	41.38	0.0037	R	IQTQPGYANTLR	D
1D-5	220	sp|Q13492|PICAL_HUMAN	sp	Q13492	PICAL_HUMAN	Phosphatidylinositol-binding clathrin assembly protein OS=Homo sapiens GN=PICALM PE=1 SV=2	30	70881	1	1	1	1	1.8	2458	1	1	1	713.375	1424.74	2	1424.73	0.0057	0	29.95	0.046	R	NTLFNLSNFLDK	S
1D-3,2D-33,2D-35	75	sp|P20020|AT2B1_HUMAN	sp	P20020	AT2B1_HUMAN	Plasma membrane calcium-transporting ATPase 1 OS=Homo sapiens GN=ATP2B1 PE=1 SV=3	150	139637	7	7	3	3	3.7	3763	1	1	1	958.015	1914.02	2	1914.01	0.0064	0	34.5	0.013	K	YGDLLPADGILIQGNDLK	I
1D-3,2D-34,2D-36	113	sp|Q01814|AT2B2_HUMAN	sp	Q01814	AT2B2_HUMAN	Plasma membrane calcium-transporting ATPase 2 OS=Homo sapiens GN=ATP2B2 PE=1 SV=2	29	137987	1	1	1	1	0.9	1423	1	1	1	604.292	1206.57	2	1206.57	0.004	0	29.03	0.049	R	MVTGDNINTAR	A	Oxidation (M)
1D-3,2D-36	89	sp|Q16720|AT2B3_HUMAN	sp	Q16720	AT2B3_HUMAN	Plasma membrane calcium-transporting ATPase 3 OS=Homo sapiens GN=ATP2B3 PE=1 SV=3	55	135253	2	2	1	1	1.4	3750	1	1	1	940.981	1879.95	2	1879.94	0.005	0	55.26	0.00014	K	EASDIILTDDNFTSIVK	A
1D-3,2D-36,2D-37	50	sp|P23634|AT2B4_HUMAN	sp	P23634	AT2B4_HUMAN	Plasma membrane calcium-transporting ATPase 4 OS=Homo sapiens GN=ATP2B4 PE=1 SV=2	206	139030	9	9	4	4	4.6	1494	1	1	1	604.293	1206.57	2	1206.57	0.0054	0	28.57	0.055	R	MVTGDNINTAR	A	Oxidation (M)
1D-3,2D-38,2D-39	145	sp|Q9BX97|PLVAP_HUMAN	sp	Q9BX97	PLVAP_HUMAN	Plasmalemma vesicle-associated protein OS=Homo sapiens GN=PLVAP PE=2 SV=1	39	51132	1	1	1	1	2.5	1956	1	1	1	652.333	1302.65	2	1302.65	0.0033	0	38.57	0.0069	R	VAEEQLVECVK	T
1D-6,2D-61,2D-62	37	sp|P16284|PECA1_HUMAN	sp	P16284	PECA1_HUMAN	Platelet endothelial cell adhesion molecule OS=Homo sapiens GN=PECAM1 PE=1 SV=1	230	83396	10	10	4	4	7.7	2075	1	1	1	664.332	1326.65	2	1326.65	0.0035	0	31.6	0.027	K	STESYFIPEVR	I
1D-6,2D-62	40	sp|P16671|CD36_HUMAN	sp	P16671	CD36_HUMAN	Platelet glycoprotein 4 OS=Homo sapiens GN=CD36 PE=1 SV=2	322	53589	14	14	5	5	11.9	2073	1	1	1	667.374	1332.73	2	1332.73	0.0049	0	32.16	0.025	K	QVVLEEGTIAFK	N
1D-9	165	sp|Q86SQ0|PHLB2_HUMAN	sp	Q86SQ0	PHLB2_HUMAN	Pleckstrin homology-like domain family B member 2 OS=Homo sapiens GN=PHLDB2 PE=1 SV=2	30	142812	1	1	1	1	0.9	1171	2	0	1	563.291	1124.57	2	1124.59	-0.0268	0	29.76	0.042	R	QASGTPQPALR	E
1D-7	173	sp|P51805|PLXA3_HUMAN	sp	P51805	PLXA3_HUMAN	Plexin-A3 OS=Homo sapiens GN=PLXNA3 PE=1 SV=2	29	211049	1	1	1	1	0.6	1486	1	1	1	601.863	1201.71	2	1201.72	-0.007	0	28.95	0.035	R	ITQIHPLVGPK	E
1D-6,2D-61,2D-62	213	sp|P15151|PVR_HUMAN	sp	P15151	PVR_HUMAN	Poliovirus receptor OS=Homo sapiens GN=PVR PE=1 SV=2	31	45787	1	1	1	1	1.9	507	1	1	1	481.283	960.552	2	960.551	0.0014	1	30.75	0.033	K	RLEFVAAR	L
1D-6,2D-63,2D-68	196	sp|Q92692|PVRL2_HUMAN	sp	Q92692	PVRL2_HUMAN	Poliovirus receptor-related protein 2 OS=Homo sapiens GN=PVRL2 PE=1 SV=1	33	58162	2	1	1	1	1.5	465	1	1	1	481.278	960.541	2	960.539	0.0022	0	28.36	0.068	R	AEQVIFVR	E
1D-5	141	sp|Q8N5Y8|PAR16_HUMAN	sp	Q8N5Y8	PAR16_HUMAN	Poly [ADP-ribose] polymerase 16 OS=Homo sapiens GN=PARP16 PE=2 SV=2	30	36702	1	1	1	1	4.3	2134	2	0	1	752.891	1503.77	2	1503.82	-0.0491	2	30.23	0.046	R	ARIKHSEGGDIPPK	Y
1D-5	168	sp|O75530|EED_HUMAN	sp	O75530	EED_HUMAN	Polycomb protein EED OS=Homo sapiens GN=EED PE=1 SV=2	29	50907	1	0	1	0	3.4	2447	1	1	1	723.38	1444.75	2	1444.69	0.0595	0	28.85	0.066	R	EVSTAPAGTDMPAAK	K
1D-4	211	sp|Q9NZM6|PK2L2_HUMAN	sp	Q9NZM6	PK2L2_HUMAN	Polycystic kidney disease 2-like 2 protein OS=Homo sapiens GN=PKD2L2 PE=2 SV=2	30	74256	1	1	1	1	1.9	2610	2	0	1	748.89	1495.77	2	1495.81	-0.0408	2	29.75	0.044	K	MIKQSYKNVLEK	F	Oxidation (M)
1D-5	28	sp|Q6S8J3|POTEE_HUMAN	sp	Q6S8J3	POTEE_HUMAN	POTE ankyrin domain family member E OS=Homo sapiens GN=POTEE PE=1 SV=3	397	122882	33	32	6	6	8.5	489	1	0	0	488.728	975.442	2	975.441	0.0012	0	34.46	0.01	K	AGFAGDDAPR	A
1D-3,2D-31	182	sp|Q8N7G0|PO5F2_HUMAN	sp	Q8N7G0	PO5F2_HUMAN	POU domain, class 5, transcription factor 2 OS=Homo sapiens GN=POU5F2 PE=2 SV=1	28	36541	1	0	1	0	3.4	1377	2	0	1	587.809	1173.6	2	1173.58	0.0252	0	28.17	0.083	R	LGASEAGDWLR	R
1D-3,2D-36	131	sp|O75915|PRAF3_HUMAN	sp	O75915	PRAF3_HUMAN	PRA1 family protein 3 OS=Homo sapiens GN=ARL6IP5 PE=1 SV=1	64	21600	3	3	1	1	10.1	4168	1	1	1	1065.03	2128.05	2	2128.05	0.0064	0	64.41	1.6e-05	R	TPMGIVLDALEQQEEGINR	L	Oxidation (M)
1D-9	77	sp|P11464|PSG1_HUMAN	sp	P11464	PSG1_HUMAN	Pregnancy-specific beta-1-glycoprotein 1 OS=Homo sapiens GN=PSG1 PE=2 SV=1	163	47592	5	5	3	3	9.3	1454	1	1	1	598.85	1195.68	2	1195.68	0.0032	0	33.52	0.011	R	SDPVTLNLLPK	L
1D-9	183	sp|Q00887|PSG9_HUMAN	sp	Q00887	PSG9_HUMAN	Pregnancy-specific beta-1-glycoprotein 9 OS=Homo sapiens GN=PSG9 PE=2 SV=2	37	48698	1	1	1	1	2.6	1485	1	1	1	598.85	1195.68	2	1195.68	0.0032	0	36.86	0.005	R	SDPVTLNLLPK	L
1D-3,2D-35,2D-36	84	sp|Q9UHG3|PCYOX_HUMAN	sp	Q9UHG3	PCYOX_HUMAN	Prenylcysteine oxidase 1 OS=Homo sapiens GN=PCYOX1 PE=1 SV=3	154	57003	5	5	3	3	6.7	897	1	1	1	533.794	1065.57	2	1065.57	0.002	0	30.76	0.032	K	IFSQETLTK	A
1D-3,2D-32,2D-35	162	sp|Q8NBM8|PCYXL_HUMAN	sp	Q8NBM8	PCYXL_HUMAN	Prenylcysteine oxidase-like OS=Homo sapiens GN=PCYOX1L PE=1 SV=2	44	54783	1	1	1	1	2.2	1653	1	1	1	617.348	1232.68	2	1232.68	0.0056	0	44.43	0.0015	R	FIDDVVSAVLR	A
1D-7	237	sp|Q8IY26|PPAC2_HUMAN	sp	Q8IY26	PPAC2_HUMAN	Presqualene diphosphate phosphatase OS=Homo sapiens GN=PPAPDC2 PE=1 SV=3	28	32458	1	0	1	0	4.4	2507	2	0	1	731.901	1461.79	2	1461.77	0.0217	0	28.45	0.062	R	MDLNPSFLGIALR	S	Oxidation (M)
1D-1,2D-3	203	sp|A4GXA9|EME2_HUMAN	sp	A4GXA9	EME2_HUMAN	Probable crossover junction endonuclease EME2 OS=Homo sapiens GN=EME2 PE=1 SV=2	32	41751	1	1	1	1	3.7	2764	3	0	1	757.4	1512.78	2	1512.81	-0.0234	1	34.6	0.016	R	ERMGLLAVGPDLSR	R
1D-1,2D-7	181	sp|Q8IYL2|TRM44_HUMAN	sp	Q8IYL2	TRM44_HUMAN	Probable tRNA (uracil-O(2)-)-methyltransferase OS=Homo sapiens GN=METTL19 PE=2 SV=2	29	85944	1	1	1	1	1.1	126	1	1	1	421.759	841.504	2	841.466	0.0381	0	28.96	0.042	R	EAASVPLR	D
1D-8	86	sp|P07737|PROF1_HUMAN	sp	P07737	PROF1_HUMAN	Profilin-1 OS=Homo sapiens GN=PFN1 PE=1 SV=2	152	15216	6	6	3	3	31.4	3154	1	1	1	821.378	1640.74	2	1640.74	0.0056	0	72.86	1.4e-06	R	DSLLQDGEFSMDLR	T	Oxidation (M)
1D-9	170	sp|Q8WUM4|PDC6I_HUMAN	sp	Q8WUM4	PDC6I_HUMAN	Programmed cell death 6-interacting protein OS=Homo sapiens GN=PDCD6IP PE=1 SV=1	43	96590	2	2	1	1	1.3	2352	1	1	1	698.879	1395.74	2	1395.74	0.0033	0	43.01	0.0022	K	FYNELTEILVR	F
1D-2,2D-25,2D-27	191	sp|P35232|PHB_HUMAN	sp	P35232	PHB_HUMAN	Prohibitin OS=Homo sapiens GN=PHB PE=1 SV=1	35	29843	2	2	1	1	7.4	4012	1	1	1	666.702	1997.09	3	1997.08	0.0064	0	30.89	0.026	K	AAELIANSLATAGDGLIELR	K
1D-2,2D-22,2D-23	67	sp|P35232|PHB_HUMAN	sp	P35232	PHB_HUMAN	Prohibitin OS=Homo sapiens GN=PHB PE=1 SV=1	160	29843	8	8	3	3	19.9	3386	1	1	1	999.55	1997.08	2	1997.08	0.0056	0	52.2	0.0002	K	AAELIANSLATAGDGLIELR	K
1D-2,2D-21	203	sp|Q99623|PHB2_HUMAN	sp	Q99623	PHB2_HUMAN	Prohibitin-2 OS=Homo sapiens GN=PHB2 PE=1 SV=2	30	33276	1	1	1	1	5.7	3566	1	1	1	618.669	1852.99	3	1852.98	0.0059	0	29.93	0.041	R	IGGVQQDTILAEGLHFR	I
1D-8	217	sp|P51888|PRELP_HUMAN	sp	P51888	PRELP_HUMAN	Prolargin OS=Homo sapiens GN=PRELP PE=1 SV=1	33	44181	1	1	1	1	2.6	904	1	1	1	535.797	1069.58	2	1069.59	-0.0091	0	33.02	0.019	R	ISSVPAINNR	L
1D-9	60	sp|Q07954|LRP1_HUMAN	sp	Q07954	LRP1_HUMAN	Prolow-density lipoprotein receptor-related protein 1 OS=Homo sapiens GN=LRP1 PE=1 SV=2	195	523150	6	6	4	4	1.5	1665	1	1	1	700.417	1398.82	2	1398.81	0.0105	0	59.93	2.5e-05	R	AALSGANVLTLIEK	D
1D-3	245	sp|Q32P28|P3H1_HUMAN	sp	Q32P28	P3H1_HUMAN	Prolyl 3-hydroxylase 1 OS=Homo sapiens GN=LEPRE1 PE=1 SV=2	29	84196	1	1	1	1	1.4	1137	1	1	1	562.81	1123.61	2	1123.6	0.0036	0	29.03	0.048	R	DLSFFGGLLR	R
1D-5,2D-51	17	sp|P25786|PSA1_HUMAN	sp	P25786	PSA1_HUMAN	Proteasome subunit alpha type-1 OS=Homo sapiens GN=PSMA1 PE=1 SV=1	259	29822	13	13	6	6	23.6	55	1	1	1	408.764	815.514	2	815.512	0.0024	0	31.29	0.019	R	LVSLIGSK	T
1D-5,2D-53,2D-57	45	sp|P25787|PSA2_HUMAN	sp	P25787	PSA2_HUMAN	Proteasome subunit alpha type-2 OS=Homo sapiens GN=PSMA2 PE=1 SV=2	240	25996	13	13	6	6	26.5	1458	1	1	1	600.853	1199.69	2	1199.69	0.0049	1	39.01	0.0049	K	AANGVVLATEKK	Q
1D-5,2D-54	47	sp|P25788|PSA3_HUMAN	sp	P25788	PSA3_HUMAN	Proteasome subunit alpha type-3 OS=Homo sapiens GN=PSMA3 PE=1 SV=2	231	28643	12	12	6	6	30.6	2221	1	1	1	698.875	1395.74	2	1395.73	0.0066	0	29.13	0.056	R	HVGMAVAGLLADAR	S	Oxidation (M)
1D-5,2D-55	35	sp|P25789|PSA4_HUMAN	sp	P25789	PSA4_HUMAN	Proteasome subunit alpha type-4 OS=Homo sapiens GN=PSMA4 PE=1 SV=1	159	29750	8	8	3	3	14.9	1479	1	1	1	613.821	1225.63	2	1225.62	0.0034	0	48.64	0.00058	K	LLDEVFFSEK	I
1D-5,2D-56	58	sp|P28066|PSA5_HUMAN	sp	P28066	PSA5_HUMAN	Proteasome subunit alpha type-5 OS=Homo sapiens GN=PSMA5 PE=1 SV=3	179	26565	5	5	3	3	18.3	2329	1	1	1	712.397	1422.78	2	1422.78	0.0042	0	54.81	0.00012	R	LFQVEYAIEAIK	L
1D-5,2D-57	69	sp|P60900|PSA6_HUMAN	sp	P60900	PSA6_HUMAN	Proteasome subunit alpha type-6 OS=Homo sapiens GN=PSMA6 PE=1 SV=1	159	27838	6	6	3	3	12.2	2110	1	1	1	680.879	1359.74	2	1359.74	0.0036	0	44.5	0.0018	K	LLDSSTVTHLFK	I
1D-5,2D-53,2D-57	15	sp|O14818|PSA7_HUMAN	sp	O14818	PSA7_HUMAN	Proteasome subunit alpha type-7 OS=Homo sapiens GN=PSMA7 PE=1 SV=1	318	28041	13	12	6	6	29.4	419	1	1	1	481.26	960.505	2	960.506	-0.001	0	33.69	0.025	K	NIELAVMR	R	Oxidation (M)
1D-5,2D-57	35	sp|O14818|PSA7_HUMAN	sp	O14818	PSA7_HUMAN	Proteasome subunit alpha type-7 OS=Homo sapiens GN=PSMA7 PE=1 SV=1	290	28041	10	10	5	5	23.8	1008	1	1	1	550.821	1099.63	2	1099.62	0.0037	0	52.41	0.00029	K	ALLEVVQSGGK	N
1D-5,2D-58	19	sp|P20618|PSB1_HUMAN	sp	P20618	PSB1_HUMAN	Proteasome subunit beta type-1 OS=Homo sapiens GN=PSMB1 PE=1 SV=2	254	26700	13	13	5	5	31.1	1184	1	1	1	573.798	1145.58	2	1145.58	-0.0011	0	48.61	0.00074	R	LSEGFSIHTR	D
1D-5,2D-56	208	sp|P40306|PSB10_HUMAN	sp	P40306	PSB10_HUMAN	Proteasome subunit beta type-10 OS=Homo sapiens GN=PSMB10 PE=1 SV=1	29	29203	1	0	1	0	7.3	3999	1	1	1	682.03	2043.07	3	2043.06	0.0054	0	28.98	0.052	R	LPFTALGSGQDAALAVLEDR	F
1D-5,2D-57	72	sp|P49721|PSB2_HUMAN	sp	P49721	PSB2_HUMAN	Proteasome subunit beta type-2 OS=Homo sapiens GN=PSMB2 PE=1 SV=1	154	22993	9	9	4	4	30.3	2954	1	1	1	806.396	1610.78	2	1610.77	0.008	0	36.62	0.0084	R	NGYELSPTAAANFTR	R
1D-5,2D-55	30	sp|P49720|PSB3_HUMAN	sp	P49720	PSB3_HUMAN	Proteasome subunit beta type-3 OS=Homo sapiens GN=PSMB3 PE=1 SV=2	318	23219	10	9	5	5	33.7	3015	1	1	1	815.404	1628.79	2	1628.79	0.0058	0	58.46	6.2e-05	R	FGIQAQMVTTDFQK	I	Oxidation (M)
1D-5,2D-54	42	sp|P28070|PSB4_HUMAN	sp	P28070	PSB4_HUMAN	Proteasome subunit beta type-4 OS=Homo sapiens GN=PSMB4 PE=1 SV=4	114	29242	5	5	3	3	11.4	1126	1	1	1	564.805	1127.6	2	1127.59	0.0016	0	31.39	0.033	K	QPVLSQTEAR	D
1D-5,2D-53,2D-57	10	sp|P28074|PSB5_HUMAN	sp	P28074	PSB5_HUMAN	Proteasome subunit beta type-5 OS=Homo sapiens GN=PSMB5 PE=1 SV=3	408	28633	16	16	8	8	31.2	691	1	1	1	512.781	1023.55	2	1023.55	0.0015	0	34.48	0.013	R	HGVIVAADSR	A
1D-5,2D-58	201	sp|P28072|PSB6_HUMAN	sp	P28072	PSB6_HUMAN	Proteasome subunit beta type-6 OS=Homo sapiens GN=PSMB6 PE=1 SV=4	30	25570	1	1	1	1	4.2	910	1	1	1	542.277	1082.54	2	1082.54	0.0038	0	30.4	0.032	R	TTTGSYIANR	V
1D-5,2D-59	21	sp|P28062|PSB8_HUMAN	sp	P28062	PSB8_HUMAN	Proteasome subunit beta type-8 OS=Homo sapiens GN=PSMB8 PE=1 SV=3	243	30677	9	8	5	4	21.4	298	1	1	1	451.747	901.478	2	901.477	0.0015	0	29.42	0.075	R	AIAYATHR	D
1D-5,2D-56	44	sp|P28065|PSB9_HUMAN	sp	P28065	PSB9_HUMAN	Proteasome subunit beta type-9 OS=Homo sapiens GN=PSMB9 PE=1 SV=2	111	23364	5	5	3	3	16.4	491	1	1	1	491.801	981.588	2	981.586	0.0022	0	31.51	0.011	R	VILGNELPK	F
1D-5	221	sp|O60678|ANM3_HUMAN	sp	O60678	ANM3_HUMAN	Protein arginine N-methyltransferase 3 OS=Homo sapiens GN=PRMT3 PE=1 SV=3	29	60522	1	1	1	1	1.5	463	3	0	1	508.831	1015.65	2	1015.65	-0.0074	1	29.13	0.012	K	LINFIRLK	N
1D-5,2D-52	186	sp|Q6PI77|BHLH9_HUMAN	sp	Q6PI77	BHLH9_HUMAN	Protein BHLHb9 OS=Homo sapiens GN=BHLHB9 PE=2 SV=1	34	60994	1	1	1	1	1.5	240	2	0	1	440.728	879.442	2	879.401	0.0417	0	34	0.016	K	TDAVAEMK	A	Oxidation (M)
1D-6	174	sp|Q6P4E1|CASC4_HUMAN	sp	Q6P4E1	CASC4_HUMAN	Protein CASC4 OS=Homo sapiens GN=CASC4 PE=2 SV=1	36	48949	1	1	1	1	2.5	1941	1	1	1	653.825	1305.64	2	1305.6	0.0374	2	36.17	0.01	R	EGLGKRCEDDK	V
1D-4,2D-41,2D-42,2D-44,2D-45	139	sp|P30101|PDIA3_HUMAN	sp	P30101	PDIA3_HUMAN	Protein disulfide-isomerase A3 OS=Homo sapiens GN=PDIA3 PE=1 SV=4	43	57146	1	1	1	1	2.2	2165	1	1	1	685.853	1369.69	2	1369.69	0.0045	0	42.53	0.0023	R	ELSDFISYLQR	E
1D-4,2D-43	134	sp|P13667|PDIA4_HUMAN	sp	P13667	PDIA4_HUMAN	Protein disulfide-isomerase A4 OS=Homo sapiens GN=PDIA4 PE=1 SV=2	62	73229	2	2	1	1	1.9	1437	1	1	1	595.823	1189.63	2	1189.63	0.0016	0	49.49	0.00059	K	IDATSASVLASR	F
1D-4,2D-46,2D-47	67	sp|Q15084|PDIA6_HUMAN	sp	Q15084	PDIA6_HUMAN	Protein disulfide-isomerase A6 OS=Homo sapiens GN=PDIA6 PE=1 SV=1	70	48490	2	2	1	1	3.2	1763	1	1	1	693.885	1385.75	2	1385.75	0.0032	0	69.55	4.9e-06	R	TGEAIVDAALSALR	Q
1D-4,2D-46,2D-47	140	sp|P07237|PDIA1_HUMAN	sp	P07237	PDIA1_HUMAN	Protein disulfide-isomerase OS=Homo sapiens GN=P4HB PE=1 SV=3	58	57480	2	1	2	1	3.3	489	1	1	1	483.788	965.562	2	965.559	0.0031	0	28.62	0.03	R	ILEFFGLK	K
1D-4,2D-47	87	sp|Q2PZI1|D19L1_HUMAN	sp	Q2PZI1	D19L1_HUMAN	Protein dpy-19 homolog 1 OS=Homo sapiens GN=DPY19L1 PE=2 SV=1	39	78180	3	3	1	1	1.5	1189	1	0	1	574.307	1146.6	2	1146.63	-0.033	0	39.37	0.0065	K	IMDLIGIQTK	I	Oxidation (M)
1D-7	116	sp|P49257|LMAN1_HUMAN	sp	P49257	LMAN1_HUMAN	Protein ERGIC-53 OS=Homo sapiens GN=LMAN1 PE=1 SV=2	82	57798	4	4	2	2	3.9	1703	1	1	1	706.374	1410.73	2	1410.74	-0.0018	1	44.71	0.0014	R	YVSSLTEEISKR	G
1D-9,2D-91	190	sp|A1L443|FA22F_HUMAN	sp	A1L443	FA22F_HUMAN	Protein FAM22F OS=Homo sapiens GN=FAM22F PE=2 SV=2	40	81347	1	1	1	1	0.9	25	1	1	1	403.713	805.411	2	805.423	-0.0122	1	40.31	0.0049	R	VRTGMAR	S	Oxidation (M)
1D-9,2D-92,2D-93	97	sp|Q8N5C1|FA26E_HUMAN	sp	Q8N5C1	FA26E_HUMAN	Protein FAM26E OS=Homo sapiens GN=FAM26E PE=2 SV=1	101	35945	3	3	2	2	7.4	1105	1	1	1	560.309	1118.6	2	1118.6	0.0023	0	50.21	0.00051	R	SSGLLELICK	G
1D-9	178	sp|Q8IZU1|FAM9A_HUMAN	sp	Q8IZU1	FAM9A_HUMAN	Protein FAM9A OS=Homo sapiens GN=FAM9A PE=2 SV=1	28	37430	1	1	1	1	2.1	284	3	0	1	438.764	875.512	2	875.479	0.0338	1	28.33	0.05	R	EMIKIDK	A
1D-6	233	sp|Q1MX18|INSC_HUMAN	sp	Q1MX18	INSC_HUMAN	Protein inscuteable homolog OS=Homo sapiens GN=INSC PE=1 SV=1	31	64911	1	1	1	1	1.6	368	2	0	1	460.265	918.516	2	918.518	-0.0016	0	30.56	0.041	K	EGGVVALFK	V
1D-2,2D-25,2D-27	217	sp|Q9ULU4|PKCB1_HUMAN	sp	Q9ULU4	PKCB1_HUMAN	Protein kinase C-binding protein 1 OS=Homo sapiens GN=ZMYND8 PE=1 SV=2	29	133206	1	1	1	1	1.1	2829	1	1	1	770.955	1539.89	2	1539.92	-0.0285	2	28.75	0.03	R	LIAEVKKQLELEK	Q
1D-3,2D-35,2D-37	207	sp|Q6ZN17|LN28B_HUMAN	sp	Q6ZN17	LN28B_HUMAN	Protein lin-28 homolog B OS=Homo sapiens GN=LIN28B PE=1 SV=1	32	27637	2	2	1	1	6.4	2501	2	0	1	731.36	1460.71	2	1460.66	0.0491	1	31.5	0.032	-	MAEGGASKGGGEEPGK	L
1D-6,2D-65,2D-67	142	sp|Q9NYP9|MS18A_HUMAN	sp	Q9NYP9	MS18A_HUMAN	Protein Mis18-alpha OS=Homo sapiens GN=MIS18A PE=1 SV=1	30	26816	1	1	1	1	3.4	302	1	1	1	453.231	904.447	2	904.491	-0.0446	1	30.21	0.048	-	MAGVRSLR	C	Oxidation (M)
1D-7	203	sp|Q9UFN0|NPS3A_HUMAN	sp	Q9UFN0	NPS3A_HUMAN	Protein NipSnap homolog 3A OS=Homo sapiens GN=NIPSNAP3A PE=1 SV=2	32	28563	1	1	1	1	4	1406	1	1	1	658.801	1315.59	2	1315.58	0.0114	0	31.94	0.014	K	MNEFLENFEK	N	Oxidation (M)
1D-8,2D-85	195	sp|Q9P2P1|NYNRI_HUMAN	sp	Q9P2P1	NYNRI_HUMAN	Protein NYNRIN OS=Homo sapiens GN=NYNRIN PE=1 SV=3	31	209717	1	1	1	1	0.6	1439	1	1	1	600.305	1198.6	2	1198.64	-0.0429	1	31.1	0.031	K	MPVAKTSPAGPK	T	Oxidation (M)
1D-8,2D-81	115	sp|P0C7U0|PPR28_HUMAN	sp	P0C7U0	PPR28_HUMAN	Protein phosphatase 1 regulatory subunit 28 OS=Homo sapiens GN=PPP1R28 PE=1 SV=1	39	89028	1	1	1	1	1	414	1	1	1	475.226	948.437	2	948.47	-0.0332	0	38.74	0.0047	R	NLTEGMLR	G	Oxidation (M)
1D-5	171	sp|Q5SGD2|PPM1L_HUMAN	sp	Q5SGD2	PPM1L_HUMAN	Protein phosphatase 1L OS=Homo sapiens GN=PPM1L PE=1 SV=1	40	41255	2	2	1	1	3.9	3065	2	0	1	812.887	1623.76	2	1623.82	-0.0621	0	39.69	0.0038	-	MIEDTMTLLSLLGR	I	2 Oxidation (M)
1D-8	157	sp|Q8WUY3|PRUN2_HUMAN	sp	Q8WUY3	PRUN2_HUMAN	Protein prune homolog 2 OS=Homo sapiens GN=PRUNE2 PE=1 SV=3	39	342535	2	2	1	1	0.2	483	1	0	1	484.747	967.479	2	967.443	0.0362	0	39.08	0.0041	-	MEEFLQR	A	Oxidation (M)
1D-5,2D-55	169	sp|P31949|S10AB_HUMAN	sp	P31949	S10AB_HUMAN	Protein S100-A11 OS=Homo sapiens GN=S100A11 PE=1 SV=2	36	11847	2	2	1	1	10.5	1909	1	1	1	654.357	1306.7	2	1306.7	0.0036	0	35.74	0.011	R	CIESLIAVFQK	Y
1D-5,2D-56,2D-57	88	sp|Q9UBV2|SE1L1_HUMAN	sp	Q9UBV2	SE1L1_HUMAN	Protein sel-1 homolog 1 OS=Homo sapiens GN=SEL1L PE=1 SV=3	35	89212	1	1	1	1	1.3	653	1	1	1	512.266	1022.52	2	1022.51	0.0032	0	35.17	0.013	R	AASQGYTVAR	I
1D-5,2D-53,2D-57	225	sp|Q9C0D5|TANC1_HUMAN	sp	Q9C0D5	TANC1_HUMAN	Protein TANC1 OS=Homo sapiens GN=TANC1 PE=1 SV=3	29	204260	1	1	1	1	0.5	521	2	0	1	488.729	975.443	2	975.398	0.0451	0	29.21	0.037	R	AGCGHFGDR	L
1D-5,2D-52,2D-59	224	sp|Q9H9S3|S61A2_HUMAN	sp	Q9H9S3	S61A2_HUMAN	Protein transport protein Sec61 subunit alpha isoform 2 OS=Homo sapiens GN=SEC61A2 PE=2 SV=3	28	52670	1	1	1	1	5.3	4146	1	1	1	849.141	2544.4	3	2544.39	0.0117	0	28.11	0.029	R	GTLMELGISPIVTSGLIMQLLAGAK	I	2 Oxidation (M)
1D-6,2D-61	153	sp|P21980|TGM2_HUMAN	sp	P21980	TGM2_HUMAN	Protein-glutamine gamma-glutamyltransferase 2 OS=Homo sapiens GN=TGM2 PE=1 SV=2	63	78420	2	2	1	1	2.3	3576	1	1	1	900.521	1799.03	2	1799.02	0.0076	0	63.45	9.4e-06	R	ALLVEPVINSYLLAER	D
1D-6,2D-66	202	sp|P01100|FOS_HUMAN	sp	P01100	FOS_HUMAN	Proto-oncogene c-Fos OS=Homo sapiens GN=FOS PE=1 SV=1	30	41126	1	1	1	1	2.9	958	1	1	1	546.773	1091.53	2	1091.58	-0.0445	1	30.05	0.043	R	AGVVKTMTGGR	A	Oxidation (M)
1D-7,2D-75	188	sp|P50336|PPOX_HUMAN	sp	P50336	PPOX_HUMAN	Protoporphyrinogen oxidase OS=Homo sapiens GN=PPOX PE=1 SV=1	42	51190	1	1	1	1	2.5	1398	1	1	1	591.884	1181.75	2	1181.75	0.0043	0	41.63	0.00048	R	SILLGLLLGAGR	T
1D-6	49	sp|Q16740|CLPP_HUMAN	sp	Q16740	CLPP_HUMAN	Putative ATP-dependent Clp protease proteolytic subunit, mitochondrial OS=Homo sapiens GN=CLPP PE=1 SV=1	200	30446	7	7	3	3	22	3043	1	1	1	817.411	1632.81	2	1632.8	0.005	0	93.22	2.2e-08	R	GQATDIAIQAEEIMK	L	Oxidation (M)
1D-6	160	sp|Q7L2E3|DHX30_HUMAN	sp	Q7L2E3	DHX30_HUMAN	Putative ATP-dependent RNA helicase DHX30 OS=Homo sapiens GN=DHX30 PE=1 SV=1	31	134938	1	1	1	1	0.6	366	2	0	1	453.74	905.466	2	905.475	-0.0094	1	30.64	0.046	R	MVERSLR	S	Oxidation (M)
1D-6,2D-61	107	sp|P0C7P4|UCRIL_HUMAN	sp	P0C7P4	UCRIL_HUMAN	Putative cytochrome b-c1 complex subunit Rieske-like protein 1 OS=Homo sapiens GN=UQCRFS1P1 PE=5 SV=1	100	31081	3	3	1	1	7.4	4158	1	1	1	1063.55	2125.08	2	2125.07	0.0069	0	100.44	3.6e-09	K	NAVTQFVSSMSASADVLALAK	I	Oxidation (M)
1D-6,2D-61,2D-63	172	sp|Q5VTE0|EF1A3_HUMAN	sp	Q5VTE0	EF1A3_HUMAN	Putative elongation factor 1-alpha-like 3 OS=Homo sapiens GN=EEF1A1P5 PE=5 SV=1	38	50495	2	2	1	1	5.2	4418	1	1	1	844.468	2530.38	3	2530.37	0.0096	0	29.23	0.029	R	VETGVLKPGMVVTFAPVNVTTEVK	S	Oxidation (M)
1D-6,2D-63	95	sp|Q58FF3|ENPLL_HUMAN	sp	Q58FF3	ENPLL_HUMAN	Putative endoplasmin-like protein OS=Homo sapiens GN=HSP90B2P PE=5 SV=1	90	46343	3	3	2	2	4.5	1180	1	0	0	570.296	1138.58	2	1138.57	0.004	0	59.38	4.4e-05	K	LGVIEDHSNR	T
1D-5,2D-51	154	sp|Q96CB9|NSUN4_HUMAN	sp	Q96CB9	NSUN4_HUMAN	Putative methyltransferase NSUN4 OS=Homo sapiens GN=NSUN4 PE=1 SV=2	28	43631	1	1	1	1	2.1	211	1	1	1	435.775	869.536	2	869.497	0.039	0	28.2	0.031	R	VDLATVPR	R
1D-5,2D-55	174	sp|Q76L83|ASXL2_HUMAN	sp	Q76L83	ASXL2_HUMAN	Putative Polycomb group protein ASXL2 OS=Homo sapiens GN=ASXL2 PE=1 SV=1	29	155036	1	1	1	1	1.1	3179	1	1	1	826.897	1651.78	2	1651.78	-0.0035	0	31.36	0.031	R	GMGALIATNTTENSTR	E	Oxidation (M)
1D-5	93	sp|Q658T7|F90A2_HUMAN	sp	Q658T7	F90A2_HUMAN	Putative protein FAM90A2 OS=Homo sapiens GN=FAM90A2P PE=5 SV=2	34	50623	1	1	1	1	2.2	705	1	0	1	524.25	1046.49	2	1046.54	-0.0492	1	33.51	0.016	R	SSSSLGPKER	Q
1D-5,2D-57,2D-58	120	sp|P08559|ODPA_HUMAN	sp	P08559	ODPA_HUMAN	Pyruvate dehydrogenase E1 component subunit alpha, somatic form, mitochondrial OS=Homo sapiens GN=PDHA1 PE=1 SV=3	85	43952	4	4	2	2	5.6	679	1	1	1	508.23	1014.45	2	1014.44	0.0022	0	34.11	0.0059	R	YGMGTSVER	A	Oxidation (M)
1D-5	92	sp|P11177|ODPB_HUMAN	sp	P11177	ODPB_HUMAN	Pyruvate dehydrogenase E1 component subunit beta, mitochondrial OS=Homo sapiens GN=PDHB PE=1 SV=3	51	39550	2	2	1	1	4.5	3496	1	1	1	882.442	1762.87	2	1762.87	-0.0016	0	37.15	0.0092	R	IMEGPAFNFLDAPAVR	V	Oxidation (M)
1D-5,2D-57	22	sp|P14618|KPYM_HUMAN	sp	P14618	KPYM_HUMAN	Pyruvate kinase isozymes M1/M2 OS=Homo sapiens GN=PKM2 PE=1 SV=4	518	58470	21	20	11	10	28.4	1232	1	1	1	571.31	1140.61	2	1140.6	0.003	0	31.26	0.028	R	GDLGIEIPAEK	V
1D-1	145	sp|O60518|RNBP6_HUMAN	sp	O60518	RNBP6_HUMAN	Ran-binding protein 6 OS=Homo sapiens GN=RANBP6 PE=1 SV=2	35	126173	1	1	1	1	0.8	770	1	1	1	515.28	1028.55	2	1028.59	-0.0452	1	34.61	0.016	R	QMAAALLRR	L
1D-2,2D-22,2D-27	201	sp|Q6ZS11|RINL_HUMAN	sp	Q6ZS11	RINL_HUMAN	Ras and Rab interactor-like protein OS=Homo sapiens GN=RINL PE=2 SV=1	32	50194	1	1	1	1	1.5	310	1	1	1	450.773	899.532	2	899.541	-0.0091	2	32.32	0.025	R	RRQTALR	A
1D-3,2D-32,2D-36	166	sp|Q96PV0|SYGP1_HUMAN	sp	Q96PV0	SYGP1_HUMAN	Ras GTPase-activating protein SynGAP OS=Homo sapiens GN=SYNGAP1 PE=1 SV=4	30	149160	1	0	1	0	0.5	151	2	0	1	422.731	843.448	2	843.445	0.0026	0	29.66	0.056	R	LLDAQER	Q
1D-3,2D-39	139	sp|P46940|IQGA1_HUMAN	sp	P46940	IQGA1_HUMAN	Ras GTPase-activating-like protein IQGAP1 OS=Homo sapiens GN=IQGAP1 PE=1 SV=1	53	189761	1	1	1	1	1.1	3647	1	1	1	942.018	1882.02	2	1882	0.0159	0	55.4	9.7e-05	R	ILAIGLINEALDEGDAQK	T
1D-3,2D-36,2D-39	112	sp|P61026|RAB10_HUMAN	sp	P61026	RAB10_HUMAN	Ras-related protein Rab-10 OS=Homo sapiens GN=RAB10 PE=1 SV=1	85	22755	3	3	2	2	11	584	1	0	0	536.327	1070.64	2	1070.63	0.0069	0	41.93	0.0022	K	LLLIGDSGVGK	T
1D-4	168	sp|Q15907|RB11B_HUMAN	sp	Q15907	RB11B_HUMAN	Ras-related protein Rab-11B OS=Homo sapiens GN=RAB11B PE=1 SV=4	40	24588	1	1	1	1	6	1787	1	1	1	645.38	1288.74	2	1288.74	0.0054	0	40.04	0.0028	R	GAVGALLVYDIAK	H
1D-4,2D-42,2D-44	70	sp|P62820|RAB1A_HUMAN	sp	P62820	RAB1A_HUMAN	Ras-related protein Rab-1A OS=Homo sapiens GN=RAB1A PE=1 SV=3	113	22891	6	6	2	2	13.7	917	1	1	0	536.327	1070.64	2	1070.63	0.0053	0	41.27	0.0026	K	LLLIGDSGVGK	S
1D-4,2D-45,2D-46	89	sp|Q9H0U4|RAB1B_HUMAN	sp	Q9H0U4	RAB1B_HUMAN	Ras-related protein Rab-1B OS=Homo sapiens GN=RAB1B PE=1 SV=1	39	22328	2	2	1	1	7.5	2342	1	1	1	729.364	1456.71	2	1456.71	0.0034	0	38.81	0.0055	R	MGPGAASGGERPNLK	I	Oxidation (M)
1D-5,2D-53	156	sp|Q9UL25|RAB21_HUMAN	sp	Q9UL25	RAB21_HUMAN	Ras-related protein Rab-21 OS=Homo sapiens GN=RAB21 PE=1 SV=3	50	24731	1	1	1	1	6.7	1108	1	1	1	557.275	1112.54	2	1112.53	0.0034	0	50.45	0.00027	M	AAAGGGGGGAAAAGR	A	Acetyl (Protein N-term)
1D-5,2D-57	145	sp|Q8WUD1|RAB2B_HUMAN	sp	Q8WUD1	RAB2B_HUMAN	Ras-related protein Rab-2B OS=Homo sapiens GN=RAB2B PE=1 SV=1	50	24427	2	2	1	1	6	1918	1	1	1	660.371	1318.73	2	1318.72	0.0026	0	46.02	0.0011	R	GAAGALLVYDITR	R
1D-6,2D-61,2D-69	162	sp|Q15286|RAB35_HUMAN	sp	Q15286	RAB35_HUMAN	Ras-related protein Rab-35 OS=Homo sapiens GN=RAB35 PE=1 SV=1	42	23296	2	2	1	1	5.5	584	1	0	1	536.327	1070.64	2	1070.63	0.0069	0	41.93	0.0022	K	LLIIGDSGVGK	S
1D-6,2D-66	137	sp|P20339|RAB5A_HUMAN	sp	P20339	RAB5A_HUMAN	Ras-related protein Rab-5A OS=Homo sapiens GN=RAB5A PE=1 SV=2	31	23872	2	2	1	1	5.1	864	1	1	1	543.335	1084.66	2	1084.65	0.0062	0	30.07	0.029	K	LVLLGESAVGK	S
1D-6,2D-65,2D-67	116	sp|P61020|RAB5B_HUMAN	sp	P61020	RAB5B_HUMAN	Ras-related protein Rab-5B OS=Homo sapiens GN=RAB5B PE=1 SV=1	74	23920	5	4	2	1	11.6	2717	1	1	1	768.912	1535.81	2	1535.8	0.0079	0	28.99	0.055	K	TAMNVNDLFLAIAK	K	Oxidation (M)
1D-8,2D-85,2D-87	70	sp|P51148|RAB5C_HUMAN	sp	P51148	RAB5C_HUMAN	Ras-related protein Rab-5C OS=Homo sapiens GN=RAB5C PE=1 SV=2	62	23696	3	3	2	2	11.6	834	1	1	0	543.334	1084.65	2	1084.65	0.0034	0	30.04	0.032	K	LVLLGESAVGK	S
1D-7,2D-73,2D-79	133	sp|A6NIZ1|RP1BL_HUMAN	sp	A6NIZ1	RP1BL_HUMAN	Ras-related protein Rap-1b-like protein OS=Homo sapiens PE=2 SV=1	75	21140	1	1	1	1	6.5	2598	1	1	1	747.905	1493.8	2	1493.79	0.0076	0	75.01	1.4e-06	K	INVNEIFYDLVR	Q
1D-7,2D-75,2D-77	147	sp|P61225|RAP2B_HUMAN	sp	P61225	RAP2B_HUMAN	Ras-related protein Rap-2b OS=Homo sapiens GN=RAP2B PE=1 SV=1	62	20719	4	4	1	1	6.6	2137	1	1	1	674.861	1347.71	2	1347.7	0.0042	0	57.96	8.1e-05	K	ASVDELFAEIVR	Q
1D-5	207	sp|Q00765|REEP5_HUMAN	sp	Q00765	REEP5_HUMAN	Receptor expression-enhancing protein 5 OS=Homo sapiens GN=REEP5 PE=1 SV=3	35	21707	2	2	1	1	4.8	940	1	1	1	541.255	1080.5	2	1080.49	0.0021	0	30.13	0.029	K	NCMTDLLAK	L	Oxidation (M)
1D-3	99	sp|P08575|PTPRC_HUMAN	sp	P08575	PTPRC_HUMAN	Receptor-type tyrosine-protein phosphatase C OS=Homo sapiens GN=PTPRC PE=1 SV=2	50	148644	1	1	1	1	0.8	1707	1	1	1	660.872	1319.73	2	1319.72	0.0053	0	49.55	0.00045	R	LFLAEFQSIPR	V
1D-7	163	sp|Q9BRX8|PAMM_HUMAN	sp	Q9BRX8	PAMM_HUMAN	Redox-regulatory protein PAMM OS=Homo sapiens GN=C10orf58 PE=1 SV=3	54	25861	1	1	1	1	5.2	2243	1	1	1	696.869	1391.72	2	1391.72	0.0053	0	53.76	0.00019	K	AALEYLEDIDLK	T
1D-7,2D-71,2D-73	185	sp|Q92900|RENT1_HUMAN	sp	Q92900	RENT1_HUMAN	Regulator of nonsense transcripts 1 OS=Homo sapiens GN=UPF1 PE=1 SV=2	32	125578	1	1	1	1	0.7	397	1	1	1	472.794	943.574	2	943.556	0.0174	2	32.07	0.021	R	ALKRTAER	E
1D-3,2D-21,2D-33	137	sp|O95197|RTN3_HUMAN	sp	O95197	RTN3_HUMAN	Reticulon-3 OS=Homo sapiens GN=RTN3 PE=1 SV=2	59	113169	2	1	2	1	1.8	1806	1	1	1	636.84	1271.67	2	1271.66	0.0038	0	29.52	0.056	K	TQIDHYVGIAR	D
1D-3,2D-32,2D-36	133	sp|Q9NQC3|RTN4_HUMAN	sp	Q9NQC3	RTN4_HUMAN	Reticulon-4 OS=Homo sapiens GN=RTN4 PE=1 SV=2	65	130250	2	1	2	1	2.5	2886	1	1	1	904.474	1806.93	2	1806.93	0.0092	0	38.74	0.0055	R	AYLESEVAISEELVQK	Y
1D-7,2D-71,2D-79	135	sp|P00352|AL1A1_HUMAN	sp	P00352	AL1A1_HUMAN	Retinal dehydrogenase 1 OS=Homo sapiens GN=ALDH1A1 PE=1 SV=2	46	55454	2	2	1	1	3	2910	1	1	1	795.405	1588.8	2	1588.79	0.0073	0	39.68	0.0052	R	ANNTFYGLSAGVFTK	D
1D-3	220	sp|Q8IWN7|RP1L1_HUMAN	sp	Q8IWN7	RP1L1_HUMAN	Retinitis pigmentosa 1-like 1 protein OS=Homo sapiens GN=RP1L1 PE=1 SV=4	30	263387	1	1	1	1	0.3	136	2	0	1	422.749	843.483	2	843.445	0.0384	0	30.38	0.057	R	SSPEAVVR	E
1D-3	251	sp|Q15291|RBBP5_HUMAN	sp	Q15291	RBBP5_HUMAN	Retinoblastoma-binding protein 5 OS=Homo sapiens GN=RBBP5 PE=1 SV=2	28	59800	1	0	1	0	1.3	12	2	0	1	401.231	800.448	2	800.48	-0.0312	0	28.5	0.091	R	FPSPILK	V
1D-2	147	sp|Q9Y6U7|RN215_HUMAN	sp	Q9Y6U7	RN215_HUMAN	RING finger protein 215 OS=Homo sapiens GN=RNF215 PE=1 SV=2	29	41702	1	1	1	1	2.1	391	2	0	1	471.312	940.61	2	940.571	0.0395	0	29.25	0.014	K	LLDALLQR	T
1D-2,2D-25,2D-27	103	sp|O00472|ELL2_HUMAN	sp	O00472	ELL2_HUMAN	RNA polymerase II elongation factor ELL2 OS=Homo sapiens GN=ELL2 PE=1 SV=2	31	72736	1	1	1	1	1.4	763	1	0	1	523.797	1045.58	2	1045.59	-0.0077	1	30.53	0.047	R	RSLESVLSR	K
1D-2,2D-21,2D-27	191	sp|Q5TZA2|CROCC_HUMAN	sp	Q5TZA2	CROCC_HUMAN	Rootletin OS=Homo sapiens GN=CROCC PE=1 SV=1	35	228787	1	1	1	1	0.4	363	1	0	1	457.77	913.525	2	913.523	0.0016	0	35.48	0.011	K	LALLEEAR	T
1D-5,2D-51,2D-57	218	sp|Q9Y3B9|RRP15_HUMAN	sp	Q9Y3B9	RRP15_HUMAN	RRP15-like protein OS=Homo sapiens GN=RRP15 PE=1 SV=2	28	31636	1	1	1	1	3.2	715	1	1	1	514.312	1026.61	2	1026.57	0.0381	0	28.45	0.042	R	VKPDVVQDK	E
1D-5,2D-55,2D-57	150	sp|Q8NBX0|SCPDL_HUMAN	sp	Q8NBX0	SCPDL_HUMAN	Saccharopine dehydrogenase-like oxidoreductase OS=Homo sapiens GN=SCCPDH PE=1 SV=1	36	47464	2	2	1	1	3.3	2564	1	1	1	738.452	1474.89	2	1474.89	0.0023	0	33.19	0.0051	R	NVSNLKPVPLIGPK	L
1D-5,2D-52	187	sp|Q14BN4|SLMAP_HUMAN	sp	Q14BN4	SLMAP_HUMAN	Sarcolemmal membrane-associated protein OS=Homo sapiens GN=SLMAP PE=1 SV=1	42	95995	2	2	1	1	1.3	1848	1	1	1	644.351	1286.69	2	1286.68	0.005	0	34.57	0.017	R	ENVLLSSELQR	Q
1D-5,2D-53	69	sp|P16615|AT2A2_HUMAN	sp	P16615	AT2A2_HUMAN	Sarcoplasmic/endoplasmic reticulum calcium ATPase 2 OS=Homo sapiens GN=ATP2A2 PE=1 SV=1	97	116336	3	3	2	2	3	2813	1	1	1	781.418	1560.82	2	1560.82	0.0043	0	37.23	0.0087	K	AMGVVVATGVNTEIGK	I	Oxidation (M)
1D-5,2D-52,2D-56	88	sp|Q93084|AT2A3_HUMAN	sp	Q93084	AT2A3_HUMAN	Sarcoplasmic/endoplasmic reticulum calcium ATPase 3 OS=Homo sapiens GN=ATP2A3 PE=1 SV=2	39	115444	2	2	1	1	1.4	2769	1	1	1	810.913	1619.81	2	1619.81	0.004	0	30.57	0.043	K	VGEATETALTCLVEK	M
1D-5,2D-53,2D-59	189	sp|Q9UL12|SARDH_HUMAN	sp	Q9UL12	SARDH_HUMAN	Sarcosine dehydrogenase, mitochondrial OS=Homo sapiens GN=SARDH PE=1 SV=1	35	101942	1	1	1	1	0.9	200	1	0	1	458.276	914.538	2	914.53	0.0087	1	34.67	0.018	M	ASLSRALR	V	Acetyl (Protein N-term)
1D-8,2D-81,2D-83	130	sp|Q8WTV0|SCRB1_HUMAN	sp	Q8WTV0	SCRB1_HUMAN	Scavenger receptor class B member 1 OS=Homo sapiens GN=SCARB1 PE=1 SV=1	55	61636	2	2	1	1	2.4	2599	1	1	1	741.407	1480.8	2	1480.8	0.0025	0	54.94	0.00013	K	LIMTLAFTTLGER	A	Oxidation (M)
1D-8,2D-83,2D-86	112	sp|Q86VB7|C163A_HUMAN	sp	Q86VB7	C163A_HUMAN	Scavenger receptor cysteine-rich type 1 protein M130 OS=Homo sapiens GN=CD163 PE=1 SV=2	81	129589	3	3	2	2	2.1	1370	1	1	1	596.787	1191.56	2	1191.56	0.004	0	37.56	0.0069	R	LVDGVTECSGR	L
1D-5	144	sp|O15127|SCAM2_HUMAN	sp	O15127	SCAM2_HUMAN	Secretory carrier-associated membrane protein 2 OS=Homo sapiens GN=SCAMP2 PE=1 SV=2	68	37082	3	3	2	2	9.7	2248	1	1	1	697.383	1392.75	2	1392.75	0.0043	0	32.74	0.021	R	ELQNTVANLHVR	Q
1D-5	112	sp|Q96T21|SEBP2_HUMAN	sp	Q96T21	SEBP2_HUMAN	Selenocysteine insertion sequence-binding protein 2 OS=Homo sapiens GN=SECISBP2 PE=1 SV=2	29	96087	1	1	1	1	2.1	3261	1	1	1	947.928	1893.84	2	1893.9	-0.0531	0	29.3	0.03	K	NVSIPSSEALSSDPSYNK	E
1D-6,2D-62,2D-63,2D-68	149	sp|Q16629|SRSF7_HUMAN	sp	Q16629	SRSF7_HUMAN	Serine/arginine-rich splicing factor 7 OS=Homo sapiens GN=SRSF7 PE=1 SV=1	30	27578	1	0	1	0	3.8	859	1	1	1	523.286	1044.56	2	1044.58	-0.0206	1	29.95	0.059	R	SISRPRSSR	S
1D-6,2D-65,2D-67	232	sp|Q9NRP7|STK36_HUMAN	sp	Q9NRP7	STK36_HUMAN	Serine/threonine-protein kinase 36 OS=Homo sapiens GN=STK36 PE=1 SV=2	31	145728	1	1	1	1	0.6	173	1	1	1	428.767	855.52	2	855.518	0.0019	0	30.69	0.025	K	EAALIALR	S
1D-6,2D-62,2D-63,2D-68	180	sp|Q9UHD2|TBK1_HUMAN	sp	Q9UHD2	TBK1_HUMAN	Serine/threonine-protein kinase TBK1 OS=Homo sapiens GN=TBK1 PE=1 SV=1	29	84216	1	1	1	1	1.2	624	1	1	1	496.795	991.575	2	991.57	0.0044	1	28.97	0.037	K	KTGDLFAIK	V
1D-6,2D-67,2D-68	109	sp|P67775|PP2AA_HUMAN	sp	P67775	PP2AA_HUMAN	Serine/threonine-protein phosphatase 2A catalytic subunit alpha isoform OS=Homo sapiens GN=PPP2CA PE=1 SV=1	29	36142	1	0	1	0	2.3	264	2	0	1	450.768	899.521	2	899.555	-0.034	1	28.53	0.065	R	ERITILR	G
1D-6,2D-61,2D-63	215	sp|Q969Q6|P2R3C_HUMAN	sp	Q969Q6	P2R3C_HUMAN	Serine/threonine-protein phosphatase 2A regulatory subunit B~~ subunit gamma OS=Homo sapiens GN=PPP2R3C PE=1 SV=1	29	53567	1	0	1	0	1.5	142	1	0	1	422.753	843.491	2	843.47	0.0205	0	28.97	0.073	K	LLDIENK	G
1D-7,2D-71	13	sp|P02787|TRFE_HUMAN	sp	P02787	TRFE_HUMAN	Serotransferrin OS=Homo sapiens GN=TF PE=1 SV=3	606	79294	23	23	13	13	25.6	3280	1	1	1	976.974	1951.93	2	1951.93	0.0019	1	43.74	0.0016	K	NLNEKDYELLCLDGTR	K
1D-7	176	sp|P50454|SERPH_HUMAN	sp	P50454	SERPH_HUMAN	Serpin H1 OS=Homo sapiens GN=SERPINH1 PE=1 SV=2	38	46525	1	1	1	1	3.6	2456	1	1	1	830.409	1658.8	2	1658.79	0.0088	0	37.55	0.0072	R	LYGPSSVSFADDFVR	S
1D-7	132	sp|Q9BXP5|SRRT_HUMAN	sp	Q9BXP5	SRRT_HUMAN	Serrate RNA effector molecule homolog OS=Homo sapiens GN=SRRT PE=1 SV=1	33	101060	1	1	1	1	0.9	298	1	0	1	438.764	875.514	2	875.479	0.035	0	32.79	0.018	K	MLDAAVIK	M	Oxidation (M)
1D-7,2D-71	162	sp|P49591|SYSC_HUMAN	sp	P49591	SYSC_HUMAN	Seryl-tRNA synthetase, cytoplasmic OS=Homo sapiens GN=SARS PE=1 SV=3	46	59253	2	2	1	1	1.6	620	1	1	1	495.785	989.556	2	989.555	0.0017	0	46.29	0.0011	M	VLDLDLFR	V
1D-7,2D-75,2D-77	210	sp|Q9UBL3|ASH2L_HUMAN	sp	Q9UBL3	ASH2L_HUMAN	Set1/Ash2 histone methyltransferase complex subunit ASH2 OS=Homo sapiens GN=ASH2L PE=1 SV=1	31	69307	1	1	1	1	1.6	1515	2	0	1	602.33	1202.65	2	1202.65	-0.009	1	31.05	0.043	K	DKDIIPFIDK	Y
1D-7,2D-75,2D-77	187	sp|Q5SQS7|SH24B_HUMAN	sp	Q5SQS7	SH24B_HUMAN	SH2 domain-containing protein 4B OS=Homo sapiens GN=SH2D4B PE=2 SV=1	28	51314	1	0	1	0	1.9	387	2	0	1	467.228	932.441	2	932.431	0.0097	1	28.35	0.059	K	AADEERSR	R
1D-6,2D-65,2D-67	165	sp|O60239|3BP5_HUMAN	sp	O60239	3BP5_HUMAN	SH3 domain-binding protein 5 OS=Homo sapiens GN=SH3BP5 PE=1 SV=2	30	50679	1	1	1	1	2	849	2	0	1	509.302	1016.59	2	1016.55	0.0392	1	29.5	0.046	K	KTVDDLQAK	L
1D-6	35	sp|P16219|ACADS_HUMAN	sp	P16219	ACADS_HUMAN	Short-chain specific acyl-CoA dehydrogenase, mitochondrial OS=Homo sapiens GN=ACADS PE=1 SV=1	321	44611	12	12	6	6	16.7	235	1	1	1	438.273	874.531	2	874.528	0.0034	0	28.18	0.04	K	LQVIQFK	L
1D-7	27	sp|Q9BZZ2|SN_HUMAN	sp	Q9BZZ2	SN_HUMAN	Sialoadhesin OS=Homo sapiens GN=SIGLEC1 PE=1 SV=2	469	184962	17	17	10	10	9.2	152	1	1	1	422.759	843.504	2	843.5	0.004	0	31.38	0.036	R	LGLLLCR	V
1D-6,2D-61,2D-67	135	sp|Q9H9B4|SFXN1_HUMAN	sp	Q9H9B4	SFXN1_HUMAN	Sideroflexin-1 OS=Homo sapiens GN=SFXN1 PE=1 SV=4	56	35881	2	2	1	1	4	2601	1	1	1	750.908	1499.8	2	1499.79	0.0079	0	55.6	0.00012	R	NILLTNEQLESAR	K
1D-5,2D-54,2D-57	96	sp|Q9BWM7|SFXN3_HUMAN	sp	Q9BWM7	SFXN3_HUMAN	Sideroflexin-3 OS=Homo sapiens GN=SFXN3 PE=2 SV=2	111	36298	3	3	2	2	8.6	1579	1	1	1	686.388	1370.76	2	1370.75	0.0103	0	70.97	3.4e-06	R	NLLLSGAQLEASR	N
1D-5,2D-56,2D-57	145	sp|Q99720|SGMR1_HUMAN	sp	Q99720	SGMR1_HUMAN	Sigma non-opioid intracellular receptor 1 OS=Homo sapiens GN=SIGMAR1 PE=1 SV=1	52	25169	1	1	1	1	5.4	2289	1	1	1	698.858	1395.7	2	1395.69	0.0096	0	52.04	0.00029	R	LELTTYLFGQDP	-
1D-7,2D-73,2D-75	149	sp|P67812|SC11A_HUMAN	sp	P67812	SC11A_HUMAN	Signal peptidase complex catalytic subunit SEC11A OS=Homo sapiens GN=SEC11A PE=1 SV=1	51	20612	2	2	1	1	5	817	1	1	1	524.794	1047.57	2	1047.57	0.003	0	51.14	0.00038	R	GDLLFLTNR	V
1D-7,2D-72,2D-79	182	sp|Q15005|SPCS2_HUMAN	sp	Q15005	SPCS2_HUMAN	Signal peptidase complex subunit 2 OS=Homo sapiens GN=SPCS2 PE=1 SV=3	36	25272	1	1	1	1	4	787	1	1	1	527.29	1052.56	2	1052.56	0.0032	0	35.56	0.01	R	LHDSLAIER	K
1D-7,2D-74,2D-77	145	sp|P61009|SPCS3_HUMAN	sp	P61009	SPCS3_HUMAN	Signal peptidase complex subunit 3 OS=Homo sapiens GN=SPCS3 PE=1 SV=1	68	20358	3	3	2	2	8.9	783	1	1	1	517.75	1033.49	2	1033.48	0.003	0	31.38	0.026	K	NVEDFTGPR	E
1D-4, 2D-43	151	sp|Q9H2S1|KCNN2_HUMAN	sp	Q9H2S1	KCNN2_HUMAN	Small conductance calcium-activated potassium channel protein 2 OS=Homo sapiens GN=KCNN2 PE=2 SV=2	30	64232	1	1	1	1	1.6	1211	2	0	1	563.308	1124.6	2	1124.65	-0.0436	0	29.77	0.041	K	FLQAIHQLR	S
1D-4,2D-45	256	sp|Q96NL6|SCLT1_HUMAN	sp	Q96NL6	SCLT1_HUMAN	Sodium channel and clathrin linker 1 OS=Homo sapiens GN=SCLT1 PE=1 SV=2	28	81203	1	1	1	1	1	488	1	1	1	479.742	957.469	2	957.434	0.0353	0	28.14	0.049	K	LEEMHQR	F	Oxidation (M)
1D-2,2D-25,2D-29	18	sp|P05023|AT1A1_HUMAN	sp	P05023	AT1A1_HUMAN	Sodium/potassium-transporting ATPase subunit alpha-1 OS=Homo sapiens GN=ATP1A1 PE=1 SV=1	499	114135	13	13	7	7	10.5	2559	1	1	1	843.904	1685.79	2	1685.78	0.0105	0	44.47	0.0012	R	NIAFFSTNCVEGTAR	G
1D-2,2D-21,2D-22	159	sp|P54709|AT1B3_HUMAN	sp	P54709	AT1B3_HUMAN	Sodium/potassium-transporting ATPase subunit beta-3 OS=Homo sapiens GN=ATP1B3 PE=1 SV=1	30	31834	1	1	1	1	3.9	1485	1	1	1	589.868	1177.72	2	1177.72	0.0036	0	29.81	0.011	R	IIGLKPEGVPR	I
1D-2,2D-25,2D-27	180	sp|Q9Y289|SC5A6_HUMAN	sp	Q9Y289	SC5A6_HUMAN	Sodium-dependent multivitamin transporter OS=Homo sapiens GN=SLC5A6 PE=2 SV=2	37	69509	2	2	1	1	2	2691	1	1	1	746.379	1490.74	2	1490.74	0.0033	0	31.98	0.029	R	ISGFELDPDPFVR	H
1D-5,2D-55,2D-56	35	sp|P11166|GTR1_HUMAN	sp	P11166	GTR1_HUMAN	Solute carrier family 2, facilitated glucose transporter member 1 OS=Homo sapiens GN=SLC2A1 PE=1 SV=2	312	54391	23	23	6	6	9.6	394	1	1	1	495.805	989.594	2	989.591	0.0035	0	54.52	7.5e-05	K	VTILELFR	S
1D-5,2D-52,2D-53	94	sp|Q9NSA0|S22AB_HUMAN	sp	Q9NSA0	S22AB_HUMAN	Solute carrier family 22 member 11 OS=Homo sapiens GN=SLC22A11 PE=1 SV=1	52	60674	2	2	1	1	2.2	1857	1	1	1	631.881	1261.75	2	1261.74	0.0078	0	51.89	0.00013	R	ATTALLLSFLGR	R
1D-5,2D-54,2D-55	186	sp|Q3KQZ1|S2535_HUMAN	sp	Q3KQZ1	S2535_HUMAN	Solute carrier family 25 member 35 OS=Homo sapiens GN=SLC25A35 PE=2 SV=1	34	32645	2	2	1	1	3.7	1320	1	1	1	585.848	1169.68	2	1169.68	0.004	0	33.02	0.015	R	GILDALLQTAR	T
1D-5,2D-51,2D-57	119	sp|Q86VD7|S2542_HUMAN	sp	Q86VD7	S2542_HUMAN	Solute carrier family 25 member 42 OS=Homo sapiens GN=SLC25A42 PE=1 SV=2	28	35444	1	1	1	1	2.5	134	1	1	1	421.76	841.504	2	841.466	0.0387	0	28.46	0.047	K	TAVAPLDR	T
1D-5,2D-52,2D-56	118	sp|Q9NP59|S40A1_HUMAN	sp	Q9NP59	S40A1_HUMAN	Solute carrier family 40 member 1 OS=Homo sapiens GN=SLC40A1 PE=1 SV=1	91	63186	4	4	2	2	3.5	1723	1	1	1	623.831	1245.65	2	1245.65	0.0024	1	38.89	0.007	K	AGLKEEETELK	Q
1D-9	108	sp|P01241|SOMA_HUMAN	sp	P01241	SOMA_HUMAN	Somatotropin OS=Homo sapiens GN=GH1 PE=1 SV=2	99	25117	4	2	3	1	12	1739	1	1	1	627.316	1252.62	2	1252.61	0.0043	1	28.52	0.058	K	DMDKVETFLR	I
1D-8	167	sp|Q5VWJ9|SNX30_HUMAN	sp	Q5VWJ9	SNX30_HUMAN	Sorting nexin-30 OS=Homo sapiens GN=SNX30 PE=1 SV=1	30	49987	1	1	1	1	1.6	109	2	0	1	417.74	833.466	2	833.501	-0.0346	1	29.5	0.048	K	ALDKFLK	R
1D-7	157	sp|Q9GZT3|SLIRP_HUMAN	sp	Q9GZT3	SLIRP_HUMAN	SRA stem-loop-interacting RNA-binding protein, mitochondrial OS=Homo sapiens GN=SLIRP PE=1 SV=1	44	12398	2	2	1	1	12.8	2911	1	1	1	789.919	1577.82	2	1577.82	0.0077	0	44.37	0.0016	R	NALQQENHIIDGVK	V
1D-3,2D-31,2D-32	157	sp|Q5K651|SAMD9_HUMAN	sp	Q5K651	SAMD9_HUMAN	Sterile alpha motif domain-containing protein 9 OS=Homo sapiens GN=SAMD9 PE=1 SV=1	29	185704	1	0	1	0	0.8	2712	1	1	1	744.38	1486.75	2	1486.8	-0.0502	0	28.94	0.057	K	FLQDMHTLLLTR	H
1D-3,2D-36,2D-39	86	sp|P08842|STS_HUMAN	sp	P08842	STS_HUMAN	Steryl-sulfatase OS=Homo sapiens GN=STS PE=1 SV=2	61	66305	1	1	1	1	1.9	1897	1	1	1	638.358	1274.7	2	1274.7	0.0028	0	60.84	3.6e-05	R	LTVEAAQFIQR	N
1D-3,2D-39	177	sp|Q9UJZ1|STML2_HUMAN	sp	Q9UJZ1	STML2_HUMAN	Stomatin-like protein 2 OS=Homo sapiens GN=STOML2 PE=1 SV=1	38	38624	1	1	1	1	4.2	3244	1	1	1	838.016	1674.02	2	1674.01	0.0093	0	37.78	0.0012	R	ILEPGLNILIPVLDR	I
1D-5	61	sp|P38646|GRP75_HUMAN	sp	P38646	GRP75_HUMAN	Stress-70 protein, mitochondrial OS=Homo sapiens GN=HSPA9 PE=1 SV=2	80	73920	4	3	2	2	4.6	1717	1	1	1	681.377	1360.74	2	1360.74	0.0046	0	28.56	0.061	R	AQFEGIVTDLIR	R
1D-2,2D-21	108	sp|P31040|DHSA_HUMAN	sp	P31040	DHSA_HUMAN	Succinate dehydrogenase [ubiquinone] flavoprotein subunit, mitochondrial OS=Homo sapiens GN=SDHA PE=1 SV=2	91	73672	2	2	1	1	2.1	1896	1	1	1	737.429	1472.84	2	1472.84	0.0079	0	40.38	0.003	R	LGANSLLDLVVFGR	A
1D-2,2D-26,2D-27	95	sp|P21912|DHSB_HUMAN	sp	P21912	DHSB_HUMAN	Succinate dehydrogenase [ubiquinone] iron-sulfur subunit, mitochondrial OS=Homo sapiens GN=SDHB PE=1 SV=3	133	32407	7	7	3	3	12.5	1222	1	1	1	569.8	1137.59	2	1137.58	0.004	0	42.96	0.0022	K	LQDPFSLYR	C
1D-2,2D-28,2D-29	182	sp|Q99643|C560_HUMAN	sp	Q99643	C560_HUMAN	Succinate dehydrogenase cytochrome b560 subunit, mitochondrial OS=Homo sapiens GN=SDHC PE=1 SV=1	37	18826	1	1	1	1	7.7	2296	1	1	1	690.89	1379.77	2	1379.76	0.0056	0	37.04	0.007	K	SLCLGPALIHTAK	F
1D-5,2D-52,2D-53	105	sp|Q96I99|SUCB2_HUMAN	sp	Q96I99	SUCB2_HUMAN	Succinyl-CoA ligase [GDP-forming] subunit beta, mitochondrial OS=Homo sapiens GN=SUCLG2 PE=1 SV=2	107	46824	3	3	2	2	7.4	4075	1	1	1	1028.06	2054.1	2	2054.09	0.0119	0	60.92	2.8e-05	K	ILNNSGLPITSAIDLEDAAK	K
1D-5,2D-53,2D-56	91	sp|P55809|SCOT1_HUMAN	sp	P55809	SCOT1_HUMAN	Succinyl-CoA:3-ketoacid-coenzyme A transferase 1, mitochondrial OS=Homo sapiens GN=OXCT1 PE=1 SV=1	146	56578	6	6	4	4	12.7	3249	1	1	1	559.278	1674.81	3	1674.81	0.0037	0	29.71	0.045	R	GGHVDLTMLGAMQVSK	Y	2 Oxidation (M)
1D-3	156	sp|P50443|S26A2_HUMAN	sp	P50443	S26A2_HUMAN	Sulfate transporter OS=Homo sapiens GN=SLC26A2 PE=1 SV=2	44	82635	2	2	1	1	1.2	830	1	1	1	529.824	1057.63	2	1057.63	0.0049	0	43.62	0.0014	K	YLLGLNLPR	T
1D-7,2D-75,2D-77	180	sp|P04179|SODM_HUMAN	sp	P04179	SODM_HUMAN	Superoxide dismutase [Mn], mitochondrial OS=Homo sapiens GN=SOD2 PE=1 SV=2	37	24878	2	2	1	1	4.1	746	1	1	1	514.81	1027.61	2	1027.6	0.0037	1	30.38	0.035	K	GELLEAIKR	D
1D-8	80	sp|O15260|SURF4_HUMAN	sp	O15260	SURF4_HUMAN	Surfeit locus protein 4 OS=Homo sapiens GN=SURF4 PE=1 SV=3	142	30602	4	4	2	2	10.8	2082	1	1	1	768.911	1535.81	2	1535.8	0.0061	0	46.83	0.00091	R	LCLISTFLEDGIR	M
1D-8,2D-85,2D-87	212	sp|Q9UGT4|SUSD2_HUMAN	sp	Q9UGT4	SUSD2_HUMAN	Sushi domain-containing protein 2 OS=Homo sapiens GN=SUSD2 PE=1 SV=1	31	91746	2	2	1	1	3	4757	1	1	1	914.127	2739.36	3	2739.34	0.0212	0	31.03	0.026	K	HDPTFEPLFPSETTLNPSLAQEAAK	L
1D-6	158	sp|Q99536|VAT1_HUMAN	sp	Q99536	VAT1_HUMAN	Synaptic vesicle membrane protein VAT-1 homolog OS=Homo sapiens GN=VAT1 PE=1 SV=2	47	42122	1	1	1	1	4.1	3005	1	1	1	795.889	1589.76	2	1589.76	0.0029	0	47.46	0.00072	K	GVDIVMDPLGGSDTAK	G	Oxidation (M)
1D-8,2D-81	179	sp|Q16563|SYPL1_HUMAN	sp	Q16563	SYPL1_HUMAN	Synaptophysin-like protein 1 OS=Homo sapiens GN=SYPL1 PE=1 SV=1	37	28889	2	2	1	1	4.2	1765	1	1	1	630.327	1258.64	2	1258.63	0.0038	0	37.32	0.0085	K	TVTATFGYPFR	L
1D-7,2D-75,2D-77	197	sp|Q9NVN3|RIC8B_HUMAN	sp	Q9NVN3	RIC8B_HUMAN	Synembryn-B OS=Homo sapiens GN=RIC8B PE=1 SV=2	31	59586	1	1	1	1	1.7	1208	1	1	1	574.8	1147.59	2	1147.63	-0.0495	2	30.56	0.044	K	DRKFINDIK	C
1D-8,2D-85,2D-87	210	sp|Q8N4C7|STX19_HUMAN	sp	Q8N4C7	STX19_HUMAN	Syntaxin-19 OS=Homo sapiens GN=STX19 PE=2 SV=1	31	34759	1	1	1	1	2.4	361	2	0	1	457.757	913.5	2	913.534	-0.0344	1	31.47	0.03	R	LQELKQR	T
1D-8,2D-81,2D-82	175	sp|Q9Y490|TLN1_HUMAN	sp	Q9Y490	TLN1_HUMAN	Talin-1 OS=Homo sapiens GN=TLN1 PE=1 SV=3	38	271766	1	1	1	1	0.6	1725	1	1	1	708.895	1415.77	2	1415.77	0.0016	0	37.63	0.0074	K	LAQAAQSSVATITR	L
1D-7,2D-71,2D-77	204	sp|Q9Y4G6|TLN2_HUMAN	sp	Q9Y4G6	TLN2_HUMAN	Talin-2 OS=Homo sapiens GN=TLN2 PE=1 SV=4	31	273781	1	1	1	1	0.6	3540	2	0	1	900.489	1798.96	2	1798.95	0.0088	2	30.76	0.031	R	EQGVDENETLLLRRK	F
1D-3,2D-5,2D-7	216	sp|Q92526|TCPW_HUMAN	sp	Q92526	TCPW_HUMAN	T-complex protein 1 subunit zeta-2 OS=Homo sapiens GN=CCT6B PE=1 SV=5	29	58355	1	0	1	0	1.3	142	1	0	1	422.753	843.491	2	843.506	-0.0159	1	28.97	0.073	K	IIDLKDK	V
1D-4,2D-41	165	sp|Q16881|TRXR1_HUMAN	sp	Q16881	TRXR1_HUMAN	Thioredoxin reductase 1, cytoplasmic OS=Homo sapiens GN=TXNRD1 PE=1 SV=3	46	71832	1	1	1	1	2.3	3209	1	1	1	831.453	1660.89	2	1660.89	0.0054	0	45.95	0.0011	K	VMVLDFVTPTPLGTR	W	Oxidation (M)
1D-4,2D-47	130	sp|P30048|PRDX3_HUMAN	sp	P30048	PRDX3_HUMAN	Thioredoxin-dependent peroxide reductase, mitochondrial OS=Homo sapiens GN=PRDX3 PE=1 SV=3	69	28017	2	2	1	1	5.5	1860	1	1	1	731.903	1461.79	2	1461.78	0.0093	0	68.59	5.8e-06	R	DYGVLLEGSGLALR	G
1D-3	203	sp|P26639|SYTC_HUMAN	sp	P26639	SYTC_HUMAN	Threonyl-tRNA synthetase, cytoplasmic OS=Homo sapiens GN=TARS PE=1 SV=3	30	84294	1	0	1	0	1.1	209	1	1	1	430.24	858.465	2	858.492	-0.0271	0	29.52	0.076	K	ISGTVNIR	T
1D-3,2D-33	102	sp|P24557|THAS_HUMAN	sp	P24557	THAS_HUMAN	Thromboxane-A synthase OS=Homo sapiens GN=TBXAS1 PE=1 SV=3	32	61163	1	1	1	1	1.5	272	1	1	1	441.724	881.434	2	881.432	0.0022	0	31.63	0.022	R	MASGLEFK	S
1D-3,2D-36,2D-39	130	sp|P04216|THY1_HUMAN	sp	P04216	THY1_HUMAN	Thy-1 membrane glycoprotein OS=Homo sapiens GN=THY1 PE=1 SV=2	66	18151	2	2	1	1	8.7	2826	1	1	1	781.917	1561.82	2	1561.81	0.0062	0	66.44	1e-05	K	VTSLTACLVDQSLR	L
1D-4,2D-41,2D-46	162	sp|O95049|ZO3_HUMAN	sp	O95049	ZO3_HUMAN	Tight junction protein ZO-3 OS=Homo sapiens GN=TJP3 PE=1 SV=2	37	102852	2	2	1	1	1	958	2	0	1	544.772	1087.53	2	1087.57	-0.0403	0	34.64	0.016	R	QDVQMKPVK	S	Oxidation (M)
1D-4,2D-45,2D-47	221	sp|O43897|TLL1_HUMAN	sp	O43897	TLL1_HUMAN	Tolloid-like protein 1 OS=Homo sapiens GN=TLL1 PE=1 SV=1	30	116916	2	2	1	1	0.8	136	1	1	1	421.759	841.504	2	841.466	0.0381	0	29.62	0.036	M	GLGTLSPR	M	Acetyl (Protein N-term)
1D-5,2D-52,2D-55	210	sp|Q5JTV8|TOIP1_HUMAN	sp	Q5JTV8	TOIP1_HUMAN	Torsin-1A-interacting protein 1 OS=Homo sapiens GN=TOR1AIP1 PE=1 SV=2	29	66379	2	2	1	1	1.2	360	1	1	1	451.209	900.403	2	900.434	-0.0312	0	29.21	0.017	R	ESAYYLR	S
1D-5,2D-53,2D-57	195	sp|Q14135|VGLL4_HUMAN	sp	Q14135	VGLL4_HUMAN	Transcription cofactor vestigial-like protein 4 OS=Homo sapiens GN=VGLL4 PE=1 SV=4	32	31327	1	1	1	1	3.4	1157	2	0	1	572.816	1143.62	2	1143.63	-0.012	0	31.6	0.038	K	ALGDTWLQIK	A
1D-5	234	sp|Q7KZ85|SPT6H_HUMAN	sp	Q7KZ85	SPT6H_HUMAN	Transcription elongation factor SPT6 OS=Homo sapiens GN=SUPT6H PE=1 SV=2	30	200203	1	1	1	1	0.5	592	1	1	1	495.294	988.573	2	988.563	0.0104	1	32.91	0.019	R	IMKIDIEK	F
1D-8	104	sp|Q15544|TAF11_HUMAN	sp	Q15544	TAF11_HUMAN	Transcription initiation factor TFIID subunit 11 OS=Homo sapiens GN=TAF11 PE=1 SV=1	30	23350	1	1	1	1	4.7	1376	1	1	1	599.827	1197.64	2	1197.59	0.0536	0	30.42	0.039	K	WGEMPPLQPK	H	Oxidation (M)
1D-7	2	sp|P02786|TFR1_HUMAN	sp	P02786	TFR1_HUMAN	Transferrin receptor protein 1 OS=Homo sapiens GN=TFRC PE=1 SV=2	847	85274	33	32	19	19	30	359	1	1	1	468.762	935.509	2	935.508	0.0012	0	33.56	0.017	K	AVLGTSNFK	V
1D-7,2D-72	3	sp|P02786|TFR1_HUMAN	sp	P02786	TFR1_HUMAN	Transferrin receptor protein 1 OS=Homo sapiens GN=TFRC PE=1 SV=2	1076	85274	56	54	23	22	34.9	1017	1	1	1	602.821	1203.63	2	1203.62	0.0031	0	38.99	0.0069	K	LLNENSYVPR	E
1D-7,2D-75,2D-79	56	sp|P55072|TERA_HUMAN	sp	P55072	TERA_HUMAN	Transitional endoplasmic reticulum ATPase OS=Homo sapiens GN=VCP PE=1 SV=4	75	89950	3	3	2	2	2.7	783	1	1	1	525.28	1048.55	2	1048.54	0.002	0	41.08	0.0042	K	DVDLEFLAK	M
1D-8,2D-81,2D-82	119	sp|P29401|TKT_HUMAN	sp	P29401	TKT_HUMAN	Transketolase OS=Homo sapiens GN=TKT PE=1 SV=3	70	68519	3	3	2	2	5.9	3648	1	1	1	942.969	1883.92	2	1883.92	0.0073	0	31.46	0.03	R	SVPTSTVFYPSDGVATEK	A
1D-8,2D-83,2D-85	216	sp|Q8N442|GUF1_HUMAN	sp	Q8N442	GUF1_HUMAN	Translation factor GUF1, mitochondrial OS=Homo sapiens GN=GUF1 PE=1 SV=1	29	74737	1	0	1	0	1.8	2355	1	1	1	709.889	1417.76	2	1417.7	0.0601	1	28.78	0.062	M	WTLVGRGWGCAR	A
1D-8,2D-86,2D-86	192	sp|Q92616|GCN1L_HUMAN	sp	Q92616	GCN1L_HUMAN	Translational activator GCN1 OS=Homo sapiens GN=GCN1L1 PE=1 SV=6	33	294967	1	1	1	1	0.3	469	1	0	1	470.25	938.485	2	938.482	0.0025	1	32.58	0.019	K	HLDKSDPK	V
1D-8,2D-88	182	sp|P43307|SSRA_HUMAN	sp	P43307	SSRA_HUMAN	Translocon-associated protein subunit alpha OS=Homo sapiens GN=SSR1 PE=1 SV=3	36	32215	1	1	1	1	5.2	2558	1	1	1	843.409	1684.8	2	1684.79	0.0084	0	36.47	0.0086	K	GTEDFIVESLDASFR	Y
1D-8,2D-83	210	sp|P51571|SSRD_HUMAN	sp	P51571	SSRD_HUMAN	Translocon-associated protein subunit delta OS=Homo sapiens GN=SSR4 PE=1 SV=1	31	19158	2	2	1	1	11	3706	1	1	1	722.715	2165.12	3	2165.11	0.0115	0	30.95	0.03	R	NNEDISIIPPLFTVSVDHR	G
1D-5,2D-51	209	sp|O15321|TM9S1_HUMAN	sp	O15321	TM9S1_HUMAN	Transmembrane 9 superfamily member 1 OS=Homo sapiens GN=TM9SF1 PE=2 SV=2	31	69330	1	1	1	1	2	1761	1	1	1	630.827	1259.64	2	1259.64	0.0037	0	31.32	0.043	K	SLSLGEVLDGDR	M
1D-5,2D-52	197	sp|Q99805|TM9S2_HUMAN	sp	Q99805	TM9S2_HUMAN	Transmembrane 9 superfamily member 2 OS=Homo sapiens GN=TM9SF2 PE=1 SV=1	33	76809	1	1	1	1	2.3	3532	1	1	1	894.912	1787.81	2	1787.8	0.0081	0	32.79	0.014	R	FCNPGFPIGCYITDK	G
1D-5,2D-54	142	sp|Q13445|TMED1_HUMAN	sp	Q13445	TMED1_HUMAN	Transmembrane emp24 domain-containing protein 1 OS=Homo sapiens GN=TMED1 PE=1 SV=1	54	25361	2	2	1	1	4	934	1	1	1	537.823	1073.63	2	1073.63	0.0042	0	48.39	0.00045	R	SIQMLTLLR	A
1D-5,2D-53	24	sp|P49755|TMEDA_HUMAN	sp	P49755	TMEDA_HUMAN	Transmembrane emp24 domain-containing protein 10 OS=Homo sapiens GN=TMED10 PE=1 SV=2	466	25131	19	18	7	7	25.6	1952	1	1	1	652.848	1303.68	2	1303.68	0.0052	0	75.43	1.5e-06	K	ITDSAGHILYSK	E
1D-5,2D-57	109	sp|Q15363|TMED2_HUMAN	sp	Q15363	TMED2_HUMAN	Transmembrane emp24 domain-containing protein 2 OS=Homo sapiens GN=TMED2 PE=1 SV=1	98	22860	5	5	2	2	10.4	1590	1	1	1	610.774	1219.53	2	1219.53	0.0051	0	42.56	0.0012	K	HEQEYMEVR	E
1D-5,2D-56	182	sp|Q7Z7H5|TMED4_HUMAN	sp	Q7Z7H5	TMED4_HUMAN	Transmembrane emp24 domain-containing protein 4 OS=Homo sapiens GN=TMED4 PE=1 SV=1	33	26097	1	1	1	1	4	1084	1	1	1	558.327	1114.64	2	1114.63	0.0039	1	32.55	0.024	K	DKLTELQLR	A
1D-5,2D-55	125	sp|Q9Y3B3|TMED7_HUMAN	sp	Q9Y3B3	TMED7_HUMAN	Transmembrane emp24 domain-containing protein 7 OS=Homo sapiens GN=TMED7 PE=1 SV=2	79	25498	4	4	2	2	10.3	1795	1	1	1	633.319	1264.62	2	1264.62	0.0044	0	45.79	0.0012	K	SVIDYQTHFR	L
1D-5,2D-56	170	sp|Q9BVK6|TMED9_HUMAN	sp	Q9BVK6	TMED9_HUMAN	Transmembrane emp24 domain-containing protein 9 OS=Homo sapiens GN=TMED9 PE=1 SV=2	29	27374	1	0	1	0	3.8	1149	1	1	1	551.318	1100.62	2	1100.62	0.0021	1	28.61	0.064	K	DKLSELQLR	V
1D-5,2D-59	132	sp|Q14956|GPNMB_HUMAN	sp	Q14956	GPNMB_HUMAN	Transmembrane glycoprotein NMB OS=Homo sapiens GN=GPNMB PE=1 SV=2	76	64623	2	2	1	1	3.1	4259	1	1	1	1073.05	2144.09	2	2144.09	0.005	0	76.06	1.1e-06	K	DVYVVTDQIPVFVTMFQK	N	Oxidation (M)
1D-5,2D-60	139	sp|Q9BVC6|TM109_HUMAN	sp	Q9BVC6	TM109_HUMAN	Transmembrane protein 109 OS=Homo sapiens GN=TMEM109 PE=1 SV=1	59	26194	3	3	1	1	4.9	1347	1	1	1	649.364	1296.71	2	1296.7	0.0097	0	59.12	4.3e-05	R	EAPVDVLTQIGR	S
1D-5,2D-55	155	sp|Q9P0S9|TM14C_HUMAN	sp	Q9P0S9	TM14C_HUMAN	Transmembrane protein 14C OS=Homo sapiens GN=TMEM14C PE=1 SV=1	45	11557	3	3	1	1	15.2	3283	1	1	1	861.472	1720.93	2	1720.93	0.0035	0	42.8	0.0018	K	FMPAGLIAGASLLMVAK	V	2 Oxidation (M)
1D-5,2D-54	145	sp|Q6UW68|TM205_HUMAN	sp	Q6UW68	TM205_HUMAN	Transmembrane protein 205 OS=Homo sapiens GN=TMEM205 PE=1 SV=1	32	21469	1	1	1	1	6.3	1840	1	1	1	630.303	1258.59	2	1258.62	-0.0319	0	32.07	0.019	-	MEEGGNLGGLIK	M	Acetyl (Protein N-term)
1D-5,2D-57	84	sp|P57088|TMM33_HUMAN	sp	P57088	TMM33_HUMAN	Transmembrane protein 33 OS=Homo sapiens GN=TMEM33 PE=1 SV=2	40	28302	2	2	1	1	4.9	1457	1	1	1	607.368	1212.72	2	1212.72	0.0025	0	40.04	0.0028	R	ALLANALTSALR	L
1D-5,2D-56	109	sp|Q9BTV4|TMM43_HUMAN	sp	Q9BTV4	TMM43_HUMAN	Transmembrane protein 43 OS=Homo sapiens GN=TMEM43 PE=1 SV=1	91	44904	2	2	2	2	10.3	2687	1	1	1	865.468	1728.92	2	1728.91	0.012	1	40.51	0.0037	R	FFLSSGLIDKVDNFK	S
1D-5,2D-59	114	sp|Q9HBL7|CI046_HUMAN	sp	Q9HBL7	CI046_HUMAN	Transmembrane protein C9orf46 OS=Homo sapiens GN=C9orf46 PE=2 SV=1	97	17190	4	4	2	2	15.6	2754	1	1	1	754.863	1507.71	2	1507.71	0.0033	1	60.44	3.5e-05	R	MKGEAEDILETEK	S	Oxidation (M)
1D-6	2	sp|P40939|ECHA_HUMAN	sp	P40939	ECHA_HUMAN	Trifunctional enzyme subunit alpha, mitochondrial OS=Homo sapiens GN=HADHA PE=1 SV=2	1099	83688	57	57	20	20	37.7	2216	1	1	1	789.402	1576.79	2	1576.79	-0.0033	0	43.66	0.002	R	FGGGNPELLTQMVSK	G
1D-6	17	sp|P55084|ECHB_HUMAN	sp	P55084	ECHB_HUMAN	Trifunctional enzyme subunit beta, mitochondrial OS=Homo sapiens GN=HADHB PE=1 SV=3	501	51547	19	18	12	12	37.3	272	1	1	1	476.289	950.563	2	950.566	-0.0035	0	28.83	0.026	R	AALTGLLHR	T
1D-6,2D-62,2D-66	58	sp|P60174|TPIS_HUMAN	sp	P60174	TPIS_HUMAN	Triosephosphate isomerase OS=Homo sapiens GN=TPI1 PE=1 SV=3	86	31057	4	4	2	2	9.4	1354	1	1	1	617.806	1233.6	2	1233.59	0.0031	0	39.92	0.0048	K	SNVSDAVAQSTR	I
1D-6,2D-61,2D-63	189	sp|O14773|TPP1_HUMAN	sp	O14773	TPP1_HUMAN	Tripeptidyl-peptidase 1 OS=Homo sapiens GN=TPP1 PE=1 SV=2	36	61723	1	1	1	1	2.5	2636	1	1	1	737.883	1473.75	2	1473.75	0.004	0	36.01	0.013	R	LFGGNFAHQASVAR	V
1D-4,2D-41,2D-42,2D-44,2D-45	158	sp|Q13641|TPBG_HUMAN	sp	Q13641	TPBG_HUMAN	Trophoblast glycoprotein OS=Homo sapiens GN=TPBG PE=1 SV=1	59	46573	1	1	1	1	3.3	2384	1	1	1	718.887	1435.76	2	1435.75	0.0095	0	58.63	6.1e-05	R	SFEGMVVAALLAGR	A	Oxidation (M)
1D-5,2D-52,2D-57	82	sp|P49815|TSC2_HUMAN	sp	P49815	TSC2_HUMAN	Tuberin OS=Homo sapiens GN=TSC2 PE=1 SV=2	41	202591	3	3	1	1	0.8	2326	2	0	1	807.923	1613.83	2	1613.9	-0.0637	2	34.47	0.017	R	ARSTSLNERPKSLR	I
1D-6,2D-66	92	sp|Q9BQE3|TBA1C_HUMAN	sp	Q9BQE3	TBA1C_HUMAN	Tubulin alpha-1C chain OS=Homo sapiens GN=TUBA1C PE=1 SV=1	34	50548	1	1	1	1	3.3	2509	1	1	1	851.46	1700.91	2	1700.9	0.0067	0	33.57	0.019	R	AVFVDLEPTVIDEVR	T
1D-6,2D-63	205	sp|Q9H3D4|P63_HUMAN	sp	Q9H3D4	P63_HUMAN	Tumor protein 63 OS=Homo sapiens GN=TP63 PE=1 SV=1	31	77649	1	1	1	1	1.3	795	2	0	1	568.784	1135.55	2	1135.54	0.0161	0	31.47	0.031	K	IEISMDCIR	M
1D-6,2D-67	139	sp|P09758|TACD2_HUMAN	sp	P09758	TACD2_HUMAN	Tumor-associated calcium signal transducer 2 OS=Homo sapiens GN=TACSTD2 PE=1 SV=3	68	36371	2	2	1	1	5	3418	1	1	1	866.897	1731.78	2	1731.77	0.0052	0	67.78	4.2e-06	K	AAGDVDIGDAAYYFER	D
1D-8	162	sp|P49895|IOD1_HUMAN	sp	P49895	IOD1_HUMAN	Type I iodothyronine deiodinase OS=Homo sapiens GN=DIO1 PE=2 SV=3	30	29135	2	2	1	1	3.6	981	1	0	1	543.334	1084.65	2	1084.66	-0.0106	0	30.28	0.028	K	VLLILFPDR	V
1D-9	255	sp|O15327|INP4B_HUMAN	sp	O15327	INP4B_HUMAN	Type II inositol-3,4-bisphosphate 4-phosphatase OS=Homo sapiens GN=INPP4B PE=2 SV=4	28	105755	1	1	1	1	1.6	3553	1	1	1	896.003	1789.99	2	1789.94	0.0479	1	28.27	0.048	K	SLNCIIAMVDKLIER	D	Oxidation (M)
1D-2,2D-23,2D-28	211	sp|P07101|TY3H_HUMAN	sp	P07101	TY3H_HUMAN	Tyrosine 3-monooxygenase OS=Homo sapiens GN=TH PE=1 SV=5	31	58963	1	1	1	1	1.7	414	1	1	1	465.755	929.495	2	929.529	-0.0342	0	31.07	0.048	R	ATKPSALSR	A
1D-2,2D-23,2D-25	205	sp|P43403|ZAP70_HUMAN	sp	P43403	ZAP70_HUMAN	Tyrosine-protein kinase ZAP-70 OS=Homo sapiens GN=ZAP70 PE=1 SV=1	32	70796	1	1	1	1	1.1	373	2	1	1	465.295	928.576	2	928.597	-0.021	1	31.84	0.02	K	FLLRPRK	E
1D-2,2D-29	147	sp|Q12923|PTN13_HUMAN	sp	Q12923	PTN13_HUMAN	Tyrosine-protein phosphatase non-receptor type 13 OS=Homo sapiens GN=PTPN13 PE=1 SV=2	42	278843	1	1	1	1	0.3	247	1	0	1	441.724	881.434	2	881.468	-0.034	0	41.71	0.0021	K	SMGFLSIK	D
1D-7,2D-71	196	sp|Q99952|PTN18_HUMAN	sp	Q99952	PTN18_HUMAN	Tyrosine-protein phosphatase non-receptor type 18 OS=Homo sapiens GN=PTPN18 PE=1 SV=2	30	51078	1	1	1	1	2.4	2501	2	0	1	731.901	1461.79	2	1461.73	0.0597	1	29.97	0.043	K	EKWLNEDIMLR	T	Oxidation (M)
1D-7,2D-77	174	sp|P54578|UBP14_HUMAN	sp	P54578	UBP14_HUMAN	Ubiquitin carboxyl-terminal hydrolase 14 OS=Homo sapiens GN=USP14 PE=1 SV=3	38	56489	1	1	1	1	2.2	1177	1	0	1	622.852	1243.69	2	1243.71	-0.0241	2	38.13	0.0068	K	EKESVNAKVLK	D
1D-5,2D-55,2D-59	141	sp|P62979|RS27A_HUMAN	sp	P62979	RS27A_HUMAN	Ubiquitin-40S ribosomal protein S27a OS=Homo sapiens GN=RPS27A PE=1 SV=2	58	18296	3	3	1	1	10.3	2838	1	1	1	894.466	1786.92	2	1786.92	-0.0024	0	57.95	7e-05	K	TITLEVEPSDTIENVK	A
1D-6	26	sp|Q9NYU2|UGGG1_HUMAN	sp	Q9NYU2	UGGG1_HUMAN	UDP-glucose:glycoprotein glucosyltransferase 1 OS=Homo sapiens GN=UGGT1 PE=1 SV=3	432	177819	19	19	9	9	7.5	1654	1	1	1	623.793	1245.57	2	1245.57	0.0059	0	51.88	0.00018	R	IEYQFFEDR	H
1D-6,2D-63	176	sp|Q9H799|CE042_HUMAN	sp	Q9H799	CE042_HUMAN	Uncharacterized protein C5orf42 OS=Homo sapiens GN=C5orf42 PE=2 SV=3	34	238393	1	1	1	1	0.5	1237	2	0	1	576.799	1151.58	2	1151.56	0.0194	0	36.66	0.0097	K	NEGMSGLFGLK	Q
1D-1	152	sp|Q6ZUG5|YC006_HUMAN	sp	Q6ZUG5	YC006_HUMAN	Uncharacterized protein FLJ43738 OS=Homo sapiens PE=2 SV=1	30	66283	1	1	1	1	2.1	2523	2	0	1	718.844	1435.67	2	1435.62	0.0527	0	29.64	0.04	R	ETENNPFESQNK	M
1D-1,2D-5,2D-7	238	sp|Q6ICG6|K0930_HUMAN	sp	Q6ICG6	K0930_HUMAN	Uncharacterized protein KIAA0930 OS=Homo sapiens GN=KIAA0930 PE=1 SV=1	30	46164	1	1	1	1	4.2	3547	2	0	1	597.638	1789.89	3	1789.98	-0.0883	2	29.98	0.048	R	SRSLSGTGRSLVGSWLK	L
1D-8	169	sp|Q6NSI8|K1841_HUMAN	sp	Q6NSI8	K1841_HUMAN	Uncharacterized protein KIAA1841 OS=Homo sapiens GN=KIAA1841 PE=2 SV=2	37	83494	2	2	1	1	1.1	578	2	0	1	488.259	974.504	2	974.497	0.0069	1	38.5	0.0086	K	MRLGDLDR	V
1D-7	130	sp|P61165|CK010_HUMAN	sp	P61165	CK010_HUMAN	UPF0197 transmembrane protein C11orf10 OS=Homo sapiens GN=C11orf10 PE=1 SV=1	34	9073	2	2	1	1	10.1	912	1	1	1	520.725	1039.43	2	1039.43	0.0035	0	29.44	0.014	-	MELEAMSR	Y	Acetyl (Protein N-term); 2 Oxidation (M)
1D-7	217	sp|Q8IV36|CQ028_HUMAN	sp	Q8IV36	CQ028_HUMAN	UPF0663 transmembrane protein C17orf28 OS=Homo sapiens GN=C17orf28 PE=1 SV=1	28	89316	1	0	1	0	1	548	2	0	1	494.285	986.556	2	986.558	-0.0024	0	28.5	0.078	K	LPLQTIMR	L	Oxidation (M)
1D-4,2D-45,2D-47	109	sp|Q16851|UGPA_HUMAN	sp	Q16851	UGPA_HUMAN	UTP--glucose-1-phosphate uridylyltransferase OS=Homo sapiens GN=UGP2 PE=1 SV=5	30	57076	1	0	1	0	2.4	1905	1	1	1	666.851	1331.69	2	1331.68	0.0043	0	29.57	0.058	K	SFENSLGINVPR	S
1D-5,2D-51,2D-57	112	sp|Q7Z7G8|VP13B_HUMAN	sp	Q7Z7G8	VP13B_HUMAN	Vacuolar protein sorting-associated protein 13B OS=Homo sapiens GN=VPS13B PE=1 SV=2	43	454309	1	1	1	1	0.2	550	1	1	1	478.757	955.498	2	955.534	-0.0354	1	43.16	0.0016	K	ENIKDIPK	F
1D-3,2D-31,2D-36	184	sp|Q86WP2|GPBP1_HUMAN	sp	Q86WP2	GPBP1_HUMAN	Vasculin OS=Homo sapiens GN=GPBP1 PE=1 SV=1	32	53478	1	1	1	1	1.9	859	1	1	1	532.312	1062.61	2	1062.64	-0.0344	2	32.39	0.018	K	KSEFLKALK	R
1D-4,2D-45,2D-47	82	sp|P49748|ACADV_HUMAN	sp	P49748	ACADV_HUMAN	Very long-chain specific acyl-CoA dehydrogenase, mitochondrial OS=Homo sapiens GN=ACADVL PE=1 SV=1	43	70745	1	1	1	1	2.3	2481	1	1	1	759.894	1517.77	2	1517.77	0.0013	0	43.12	0.0026	R	VPSENVLGEVGSGFK	V
1D-6,2D-65,2D-67	175	sp|O75396|SC22B_HUMAN	sp	O75396	SC22B_HUMAN	Vesicle-trafficking protein SEC22b OS=Homo sapiens GN=SEC22B PE=1 SV=4	39	24806	1	1	1	1	5.6	2480	1	1	1	715.889	1429.76	2	1429.76	0.004	0	38.68	0.0063	R	IMVANIEEVLQR	G	Oxidation (M)
1D-6	36	sp|P08670|VIME_HUMAN	sp	P08670	VIME_HUMAN	Vimentin OS=Homo sapiens GN=VIM PE=1 SV=4	307	53676	14	14	7	7	20.4	1383	1	1	1	656.337	1310.66	2	1310.65	0.0064	0	38.5	0.0058	K	MALDIEIATYR	K	Oxidation (M)
1D-6	23	sp|P18206|VINC_HUMAN	sp	P18206	VINC_HUMAN	Vinculin OS=Homo sapiens GN=VCL PE=1 SV=4	418	124292	17	16	11	11	13.1	1593	1	1	1	615.364	1228.71	2	1228.71	0.0038	0	32.53	0.019	K	ELLPVLISAMK	I	Oxidation (M)
1D-7	107	sp|P21796|VDAC1_HUMAN	sp	P21796	VDAC1_HUMAN	Voltage-dependent anion-selective channel protein 1 OS=Homo sapiens GN=VDAC1 PE=1 SV=2	30	30868	1	1	1	1	7.1	3476	1	1	1	701.726	2102.16	3	2102.17	-0.0174	0	29.99	0.027	K	VNNSSLIGLGYTQTLKPGIK	L
1D-7,2D-75	83	sp|P45880|VDAC2_HUMAN	sp	P45880	VDAC2_HUMAN	Voltage-dependent anion-selective channel protein 2 OS=Homo sapiens GN=VDAC2 PE=1 SV=2	43	32060	2	2	1	1	3.4	646	1	1	1	508.804	1015.59	2	1015.59	0.0023	0	42.72	0.0022	K	LTLSALVDGK	S
1D-7,2D-77	148	sp|Q9Y277|VDAC3_HUMAN	sp	Q9Y277	VDAC3_HUMAN	Voltage-dependent anion-selective channel protein 3 OS=Homo sapiens GN=VDAC3 PE=1 SV=1	50	30981	2	2	1	1	3.5	502	1	0	1	515.812	1029.61	2	1029.61	0.0015	0	39.89	0.0034	K	LTLSALIDGK	N
1D-2,2D-25,2D-28	187	sp|Q93050|VPP1_HUMAN	sp	Q93050	VPP1_HUMAN	V-type proton ATPase 116 kDa subunit a isoform 1 OS=Homo sapiens GN=ATP6V0A1 PE=1 SV=3	33	97148	1	1	1	1	1.1	1115	1	1	1	553.81	1105.61	2	1105.6	0.0043	0	33.3	0.021	R	NFLELTELK	F
1D-2,2D-21,2D-25	113	sp|P27449|VATL_HUMAN	sp	P27449	VATL_HUMAN	V-type proton ATPase 16 kDa proteolipid subunit OS=Homo sapiens GN=ATP6V0C PE=1 SV=1	48	15725	2	2	1	1	11.6	3888	1	1	1	652.32	1953.94	3	1953.93	0.0072	0	36.58	0.0082	K	SGTGIAAMSVMRPEQIMK	S	3 Oxidation (M)
1D-2,2D-28,2D-29	108	sp|P61421|VA0D1_HUMAN	sp	P61421	VA0D1_HUMAN	V-type proton ATPase subunit d 1 OS=Homo sapiens GN=ATP6V0D1 PE=1 SV=1	53	40759	2	2	1	1	3.7	1946	1	1	1	652.83	1303.65	2	1303.64	0.0052	0	52.72	0.00027	K	LLFEGAGSNPGDK	T
1D-6	215	sp|Q8IUA0|WFDC8_HUMAN	sp	Q8IUA0	WFDC8_HUMAN	WAP four-disulfide core domain protein 8 OS=Homo sapiens GN=WFDC8 PE=2 SV=2	29	29516	1	1	1	1	7.1	4217	2	0	1	1029.55	2057.09	2	2057.13	-0.0403	2	28.78	0.05	K	GFCPRKPLLCTKIDKPK	C
1D-6,2D-65,2D-67	103	sp|O75083|WDR1_HUMAN	sp	O75083	WDR1_HUMAN	WD repeat-containing protein 1 OS=Homo sapiens GN=WDR1 PE=1 SV=4	124	66836	4	4	2	2	5	2849	1	1	1	769.431	1536.85	2	1536.84	0.0075	1	54.64	0.00012	R	LYSILGTTLKDEGK	L
1D-6,2D-67	219	sp|Q5JSH3|WDR44_HUMAN	sp	Q5JSH3	WDR44_HUMAN	WD repeat-containing protein 44 OS=Homo sapiens GN=WDR44 PE=1 SV=1	30	101874	2	2	1	1	0.9	556	1	1	1	487.793	973.572	2	973.592	-0.0196	2	29.95	0.041	K	QKTTQLKK	F
1D-5,2D-55,2D-57	86	sp|Q6UE05|WBS28_HUMAN	sp	Q6UE05	WBS28_HUMAN	Williams-Beuren syndrome chromosomal region 28 protein OS=Homo sapiens GN=WBSCR28 PE=2 SV=2	40	29813	1	1	1	1	3.4	812	2	0	1	529.797	1057.58	2	1057.57	0.0086	0	39.53	0.0071	K	ALQVNCVVR	K
1D-5,2D-52,2D-57	128	sp|A4UGR9|XIRP2_HUMAN	sp	A4UGR9	XIRP2_HUMAN	Xin actin-binding repeat-containing protein 2 OS=Homo sapiens GN=XIRP2 PE=1 SV=2	41	383888	1	1	1	1	0.4	2832	1	1	1	780.379	1558.74	2	1558.75	-0.0063	1	41.31	0.0029	K	QQTYELRNDHQK	M
1D-5,2D-54	208	sp|Q8NAP3|ZBT38_HUMAN	sp	Q8NAP3	ZBT38_HUMAN	Zinc finger and BTB domain-containing protein 38 OS=Homo sapiens GN=ZBTB38 PE=1 SV=2	32	136567	1	1	1	1	0.6	59	1	0	1	411.722	821.43	2	821.407	0.0233	1	31.58	0.027	K	KVSDSMR	T
1D-5,2D-55	147	sp|Q96SZ4|ZSC10_HUMAN	sp	Q96SZ4	ZSC10_HUMAN	Zinc finger and SCAN domain-containing protein 10 OS=Homo sapiens GN=ZSCAN10 PE=2 SV=1	30	82503	2	2	1	1	1.4	969	1	1	1	539.769	1077.52	2	1077.53	-0.0047	2	29.04	0.061	R	RSSEGSGSRR	R
1D-5,2D-56	213	sp|Q15911|ZFHX3_HUMAN	sp	Q15911	ZFHX3_HUMAN	Zinc finger homeobox protein 3 OS=Homo sapiens GN=ZFHX3 PE=1 SV=2	29	408841	1	0	1	0	0.2	627	1	1	1	502.781	1003.55	2	1003.55	-0.0006	1	28.96	0.066	K	KLADMIASR	Q
1D-5,2D-56	166	sp|Q5H9K5|ZMAT1_HUMAN	sp	Q5H9K5	ZMAT1_HUMAN	Zinc finger matrin-type protein 1 OS=Homo sapiens GN=ZMAT1 PE=2 SV=1	29	75734	2	1	1	1	1.3	426	1	1	1	453.722	905.43	2	905.391	0.0384	0	29.49	0.049	R	EMVDSGPR	S	Oxidation (M)
1D-5,2D-53,2D-55	164	sp|Q9ULJ3|ZN295_HUMAN	sp	Q9ULJ3	ZN295_HUMAN	Zinc finger protein 295 OS=Homo sapiens GN=ZNF295 PE=1 SV=2	30	120564	1	1	1	1	0.7	109	2	0	1	413.78	825.545	2	825.58	-0.0351	1	29.51	0.01	K	ALIIKLR	R
1D-5,2D-51,2D-53	205	sp|Q9Y6R6|Z780B_HUMAN	sp	Q9Y6R6	Z780B_HUMAN	Zinc finger protein 780B OS=Homo sapiens GN=ZNF780B PE=2 SV=1	30	99595	1	0	1	0	1.2	1336	2	0	1	588.312	1174.61	2	1174.65	-0.0372	0	29.62	0.058	K	AFSLLNQLNR	H
1D-5	203	sp|B4DU55|ZN879_HUMAN	sp	B4DU55	ZN879_HUMAN	Zinc finger protein 879 OS=Homo sapiens GN=ZNF879 PE=2 SV=2	29	66132	1	1	1	1	2.3	3019	2	0	1	811.923	1621.83	2	1621.86	-0.0238	2	29.04	0.057	K	LEKTYINEDKLEK	Q
